# Supplementary material for: Single amino-acid mutation in a Drosoph ila melanogaster ribosomal protein: An insight in uL11 transcriptional activity
Source: PubMed Central journal article supplement (PMC9387862; doi:10.1371/journal.pone.0273198), 2022-08-18
Supplement: pone.0273198.s006.pdf [file pone.0273198.s006.pdf]

|                                                |                                                                                                                                         |
|------------------------------------------------|-----------------------------------------------------------------------------------------------------------------------------------------|
| <b>High Resolution Melting Analysis</b>        |                                                                                                                                         |
| uL11-HRMA_F                                    | 5'-tgcggtaaagtacatgagctg-3'                                                                                                             |
| uL11-HRMA_R                                    | 5'-tcgaagctcaactcctcaca-3'                                                                                                              |
| <b>LNA Primers</b>                             |                                                                                                                                         |
| LNA-WT                                         | 5'-gataccgctatgcctcccaAa-3'                                                                                                             |
| LNA-K3A                                        | 5'-gataccgctatgcctcccgCc-3'                                                                                                             |
| CRISPR1_R                                      | 5'-gaccgaggggaccgatctt-3'                                                                                                               |
| <b>uL11 Sequencing</b>                         |                                                                                                                                         |
| uL11-708_F                                     | 5'-cgctactgagctttgctacacccc-3'                                                                                                          |
| uL11+805_R                                     | 5'-caataacatcgtgagggtgct-3'                                                                                                             |
| <b>Guide RNA</b>                               |                                                                                                                                         |
| sgRNA                                          | 5'-tccgttgggtcgaatttggg-3'                                                                                                              |
| <b>Cloning of sgRNA in pU6-BbsI-chiRNA</b>     |                                                                                                                                         |
| pho-sgRNA_F                                    | 5'-CTTCGtccgttgggtcgaatttggg-3'                                                                                                         |
| pho-sgRNA_R                                    | 5'-AAACcccaaattcgacccaacggac-3'                                                                                                         |
| <b>Template for fly mutagenesis</b>            |                                                                                                                                         |
| ssODN                                          | 5'-agctcaactcctcacaacaaactcgcttacttaccacaatttaacttccgttgggtcg<br>aaGGCgggaggCATagcggatccttggctgaacagtcgctgtaaggcaagattacgtta<br>gttt-3' |
| <b>uL11<sup>K3Y</sup> directed mutagenesis</b> |                                                                                                                                         |
| K3Y_F                                          | 5'-caccatgcctccctacttcgacccaacgg-3'                                                                                                     |
| K3Y_R                                          | 5'-ccgttgggtcgaagtagggaggcatggtg-3'                                                                                                     |
| <b>qRT-PCR</b>                                 |                                                                                                                                         |
| Hsp67Bc_F                                      | 5'-ctgctatattgaggctcca-3'                                                                                                               |
| Hsp67Bc_R                                      | 5'-ttgattgcacaccctgggt-3'                                                                                                               |
| GstE6_F                                        | 5'-gcccaactttcaccggaata-3'                                                                                                              |
| GstE6_R                                        | 5'-tcggcatatttcgagacc-3'                                                                                                                |
| CG13516_F                                      | 5'-gctaactccaggacccatat-3'                                                                                                              |
| CG13516_R                                      | 5'-gcgacaatagtggttccag-3'                                                                                                               |
| GAPDH_F                                        | 5'-gacgaaatcaaggctaaggctcg-3'                                                                                                           |
| GAPDH_R                                        | 5'-aatgggtgctcgctgaagaagtc-3'                                                                                                           |
| RP49_F                                         | 5'-ccgcttcaagggacagtatc-3'                                                                                                              |
| RP49_R                                         | 5'-gacaatctccttgcgcttct-3'                                                                                                              |
