# Supplementary material for: Single amino-acid mutation in a Drosoph ila melanogaster ribosomal protein: An insight in uL11 transcriptional activity
Source: PubMed Central journal article supplement (PMC9387862; doi:10.1371/journal.pone.0273198), 2022-08-18
Supplement: pone.0273198.s007.pdf [file pone.0273198.s007.pdf]

| Sample name  | Genotype                           | Total reads | Unmapped reads | Multimapped reads | Uniquely mapped reads used for the analysis |
|--------------|------------------------------------|-------------|----------------|-------------------|---------------------------------------------|
| wc_1         | $w^{1118}; corto^+$                | 1.50E+07    | 8.56E+05       | 4.29E+05          | 1.36E+07                                    |
| wc_2         | $w^{1118}; corto^+$                | 1.50E+07    | 1.17E+06       | 4.33E+05          | 1.33E+07                                    |
| cortoL1420_1 | $w^{1118}; corto^{L1}/corto^{420}$ | 2.71E+07    | 1.24E+06       | 1.85E+06          | 2.37E+07                                    |
| cortoL1420_2 | $w^{1118}; corto^{L1}/corto^{420}$ | 2.71E+07    | 1.83E+06       | 1.86E+06          | 2.31E+07                                    |
| w_1          | $w^{1118}; uL11^+$                 | 2.58E+07    | 1.36E+05       | 3.04E+06          | 2.21E+07                                    |
| w_2          | $w^{1118}; uL11^+$                 | 3.22E+07    | 1.44E+05       | 2.13E+06          | 2.97E+07                                    |
| w_3          | $w^{1118}; uL11^+$                 | 3.49E+07    | 3.90E+05       | 3.37E+06          | 3.06E+07                                    |
| K3A_1        | $w^{1118}; uL11^{K3A}$             | 2.53E+07    | 2.11E+05       | 2.07E+06          | 2.15E+07                                    |
| K3A_2        | $w^{1118}; uL11^{K3A}$             | 4.01E+07    | 1.66E+06       | 2.32E+07          | 1.16E+07                                    |
| K3A_3        | $w^{1118}; uL11^{K3A}$             | 3.28E+07    | 6.25E+05       | 1.05E+07          | 1.91E+07                                    |
| K3Y_1        | $w^{1118}; uL11^{K3Y}$             | 3.07E+07    | 2.06E+05       | 2.11E+06          | 2.81E+07                                    |
| K3Y_2        | $w^{1118}; uL11^{K3Y}$             | 3.16E+07    | 9.03E+05       | 2.86E+06          | 2.74E+07                                    |
| K3Y_3        | $w^{1118}; uL11^{K3Y}$             | 3.34E+07    | 3.10E+05       | 1.67E+06          | 3.12E+07                                    |
