# Supplementary material for: Single amino-acid mutation in a Drosoph ila melanogaster ribosomal protein: An insight in uL11 transcriptional activity
Source: PubMed Central journal article supplement (PMC9387862; doi:10.1371/journal.pone.0273198), 2022-08-18
Supplement: pone.0273198.s008.pdf [file pone.0273198.s008.pdf]

| Gene ID     | Gene symbol         | Base Mean | log <sub>2</sub> FoldChange<br>corto <sup>L1</sup> /corto <sup>420</sup> versus w <sup>1118</sup> | adj p-value corto <sup>L1</sup> /corto <sup>420</sup><br>versus w <sup>1118</sup> | log <sub>2</sub> FoldChange uL11 <sup>K3A</sup><br>versus w <sup>1118</sup> | adj p-value uL11 <sup>K3A</sup><br>versus w <sup>1118</sup> | log <sub>2</sub> FoldChange uL11 <sup>K3Y</sup><br>versus w <sup>1118</sup> | adj p-value uL11 <sup>K3Y</sup><br>versus w <sup>1118</sup> |
|-------------|---------------------|-----------|---------------------------------------------------------------------------------------------------|-----------------------------------------------------------------------------------|-----------------------------------------------------------------------------|-------------------------------------------------------------|-----------------------------------------------------------------------------|-------------------------------------------------------------|
| FBgn0085813 | 18SrRNA-Psi:CR41602 | 492       | 0.12                                                                                              | 5.47E-01                                                                          | 2.53                                                                        | 1.23E-03                                                    | -0.01                                                                       | 1.00E+00                                                    |
| FBgn0085753 | 28SrRNA-Psi:CR40596 | 815       | 0.17                                                                                              | 2.96E-01                                                                          | 1.41                                                                        | 1.30E-02                                                    | -0.01                                                                       | 1.00E+00                                                    |
| FBgn0085771 | 28SrRNA-Psi:CR40741 | 96        | 3.34                                                                                              | 8.74E-05                                                                          | 3.25                                                                        | 5.48E-05                                                    | -0.01                                                                       | 1.00E+00                                                    |
| FBgn0267508 | 28SrRNA-Psi:CR45848 | 67        | 0.18                                                                                              | 3.14E-01                                                                          | 2.82                                                                        | 4.86E-04                                                    | 0.00                                                                        | 1.00E+00                                                    |
| FBgn0267511 | 28SrRNA-Psi:CR45851 | 67        | -0.02                                                                                             | 8.65E-01                                                                          | 1.85                                                                        | 1.04E-02                                                    | 0.00                                                                        | 1.00E+00                                                    |
| FBgn0267513 | 28SrRNA-Psi:CR45853 | 36        | 0.04                                                                                              | 8.53E-01                                                                          | 2.51                                                                        | 1.39E-03                                                    | -0.01                                                                       | 1.00E+00                                                    |
| FBgn0267515 | 28SrRNA-Psi:CR45855 | 55        | 0.08                                                                                              | 5.85E-01                                                                          | 1.60                                                                        | 9.23E-03                                                    | 0.00                                                                        | 1.00E+00                                                    |
| FBgn0267520 | 28SrRNA-Psi:CR45860 | 204       | 0.27                                                                                              | 8.96E-02                                                                          | 1.47                                                                        | 1.26E-02                                                    | 0.00                                                                        | 1.00E+00                                                    |
| FBgn0052016 | 4E-T                | 2991      | -0.97                                                                                             | 6.64E-13                                                                          | -0.07                                                                       | 3.82E-01                                                    | 0.00                                                                        | 1.00E+00                                                    |
| FBgn0023129 | asy                 | 91        | -0.12                                                                                             | 6.58E-01                                                                          | -1.00                                                                       | 6.49E-03                                                    | -0.18                                                                       | 1.45E-01                                                    |
| FBgn0039890 | ABCD                | 2965      | -0.64                                                                                             | 4.77E-10                                                                          | -0.08                                                                       | 2.74E-01                                                    | -0.06                                                                       | 2.18E-01                                                    |
| FBgn0004852 | Ac76E               | 330       | -3.26                                                                                             | 6.23E-33                                                                          | 0.04                                                                        | 6.42E-01                                                    | 0.00                                                                        | 1.00E+00                                                    |
| FBgn0027620 | Act                 | 2690      | -0.62                                                                                             | 3.33E-06                                                                          | 0.02                                                                        | 8.64E-01                                                    | 0.01                                                                        | 9.06E-01                                                    |
| FBgn0051865 | Ada1-1              | 19        | 0.05                                                                                              | 8.42E-01                                                                          | -5.48                                                                       | 5.96E-05                                                    | 0.07                                                                        | 3.78E-01                                                    |
| FBgn0026086 | Adar                | 2162      | -0.71                                                                                             | 2.33E-05                                                                          | -0.01                                                                       | 9.70E-01                                                    | 0.00                                                                        | 1.00E+00                                                    |
| FBgn0026573 | ADD1                | 1787      | -0.61                                                                                             | 3.07E-10                                                                          | -0.02                                                                       | 9.06E-01                                                    | 0.01                                                                        | 1.00E+00                                                    |
| FBgn0052068 | Adi1                | 187       | 0.12                                                                                              | 6.12E-01                                                                          | 0.41                                                                        | 5.04E-03                                                    | 0.79                                                                        | 4.87E-07                                                    |
| FBgn0038223 | Afti                | 793       | -0.64                                                                                             | 8.75E-06                                                                          | 0.00                                                                        | 1.00E+00                                                    | 0.00                                                                        | 1.00E+00                                                    |
| FBgn0029813 | AgmNAT              | 22        | 0.59                                                                                              | 2.40E-02                                                                          | 0.05                                                                        | 6.08E-01                                                    | 0.00                                                                        | 1.00E+00                                                    |
| FBgn0250816 | AGO3                | 64        | -0.64                                                                                             | 1.52E-02                                                                          | 2.09                                                                        | 1.17E-13                                                    | 0.38                                                                        | 5.07E-02                                                    |
| FBgn0024912 | agt                 | 851       | 0.61                                                                                              | 3.04E-06                                                                          | 1.63                                                                        | 1.55E-43                                                    | 0.21                                                                        | 4.55E-02                                                    |
| FBgn0014455 | Ahcy                | 3702      | 0.65                                                                                              | 5.05E-11                                                                          | 0.02                                                                        | 8.74E-01                                                    | 0.00                                                                        | 1.00E+00                                                    |
| FBgn0033351 | AIMP1               | 804       | 0.72                                                                                              | 4.73E-05                                                                          | 0.05                                                                        | 5.43E-01                                                    | 0.00                                                                        | 1.00E+00                                                    |
| FBgn0050185 | AIMP3               | 582       | 0.65                                                                                              | 2.84E-04                                                                          | 0.03                                                                        | 7.70E-01                                                    | 0.00                                                                        | 1.00E+00                                                    |
| FBgn0027932 | Akap200             | 21721     | -1.15                                                                                             | 5.83E-49                                                                          | 0.04                                                                        | 6.85E-01                                                    | 0.00                                                                        | 1.00E+00                                                    |
| FBgn0012036 | Aldh                | 651       | 0.77                                                                                              | 6.08E-03                                                                          | 0.00                                                                        | 9.72E-01                                                    | 0.07                                                                        | 4.09E-01                                                    |
| FBgn0011297 | Alq3                | 292       | 0.70                                                                                              | 8.24E-06                                                                          | -0.28                                                                       | 7.21E-03                                                    | -0.01                                                                       | 9.05E-01                                                    |
| FBgn0283479 | Alp1                | 47        | 0.10                                                                                              | 5.76E-01                                                                          | -0.60                                                                       | 5.71E-02                                                    | -0.01                                                                       | 1.00E+00                                                    |
| FBgn0033423 | Alp6                | 12        | -0.02                                                                                             | 8.84E-01                                                                          | -1.02                                                                       | 3.05E-02                                                    | -0.09                                                                       | 3.70E-01                                                    |
| FBgn0034710 | Alp7                | 85        | -0.13                                                                                             | 2.20E-01                                                                          | -8.44                                                                       | 5.06E-06                                                    | -0.01                                                                       | 1.00E+00                                                    |
| FBgn0034712 | Alp8                | 99        | -0.07                                                                                             | 4.75E-01                                                                          | -0.66                                                                       | 5.26E-02                                                    | 0.00                                                                        | 1.00E+00                                                    |
| FBgn0086361 | alph                | 3610      | -0.65                                                                                             | 1.44E-17                                                                          | 0.04                                                                        | 6.45E-01                                                    | 0.00                                                                        | 1.00E+00                                                    |
| FBgn0015571 | alpha-Est3          | 211       | 0.63                                                                                              | 2.46E-03                                                                          | 0.42                                                                        | 6.49E-03                                                    | 0.00                                                                        | 1.00E+00                                                    |
| FBgn0003884 | alphaTub84B         | 98958     | 0.58                                                                                              | 2.30E-12                                                                          | -0.03                                                                       | 7.61E-01                                                    | -0.03                                                                       | 4.82E-01                                                    |
| FBgn0003886 | alphaTub85E         | 97        | 3.34                                                                                              | 1.93E-15                                                                          | 0.01                                                                        | 8.95E-01                                                    | 0.01                                                                        | 9.37E-01                                                    |
| FBgn0031068 | Alr                 | 351       | 0.61                                                                                              | 1.35E-03                                                                          | 0.39                                                                        | 6.66E-03                                                    | 0.02                                                                        | 8.04E-01                                                    |
| FBgn0000075 | amd                 | 647       | 0.26                                                                                              | 1.88E-01                                                                          | 1.20                                                                        | 1.13E-18                                                    | 0.00                                                                        | 1.00E+00                                                    |
| FBgn0025686 | Amnionless          | 12        | -0.02                                                                                             | 9.37E-01                                                                          | -0.61                                                                       | 5.12E-02                                                    | -0.01                                                                       | 1.00E+00                                                    |
| FBgn0030328 | Amun                | 7039      | -0.79                                                                                             | 7.59E-17                                                                          | 0.01                                                                        | 9.64E-01                                                    | 0.00                                                                        | 1.00E+00                                                    |
| FBgn0012037 | Ance                | 10590     | -0.08                                                                                             | 5.00E-01                                                                          | -0.70                                                                       | 3.42E-22                                                    | -0.03                                                                       | 4.37E-01                                                    |
| FBgn0032535 | Ance-2              | 17        | -0.11                                                                                             | 5.24E-01                                                                          | -0.59                                                                       | 4.26E-02                                                    | 0.00                                                                        | 1.00E+00                                                    |
| FBgn0032536 | Ance-3              | 9         | 0.02                                                                                              | 8.74E-01                                                                          | 1.73                                                                        | 1.06E-02                                                    | 0.01                                                                        | 1.00E+00                                                    |
| FBgn0011747 | Ank                 | 7198      | -0.65                                                                                             | 1.55E-07                                                                          | -0.04                                                                       | 6.39E-01                                                    | 0.00                                                                        | 1.00E+00                                                    |
| FBgn0052000 | anne                | 6510      | -0.58                                                                                             | 4.18E-05                                                                          | 0.01                                                                        | 9.54E-01                                                    | 0.01                                                                        | 1.00E+00                                                    |
| FBgn0260642 | Antp                | 1348      | -0.77                                                                                             | 7.50E-06                                                                          | -0.02                                                                       | 8.95E-01                                                    | 0.01                                                                        | 1.00E+00                                                    |
| FBgn0267408 | AOX1                | 329       | 0.55                                                                                              | 2.96E-02                                                                          | 3.81                                                                        | 3.49E-23                                                    | 0.01                                                                        | 1.00E+00                                                    |
| FBgn0036111 | Aps                 | 7280      | -0.69                                                                                             | 1.35E-08                                                                          | 0.02                                                                        | 8.52E-01                                                    | 0.00                                                                        | 1.00E+00                                                    |
| FBgn0286516 | aqz                 | 7288      | -1.14                                                                                             | 3.19E-11                                                                          | -0.03                                                                       | 8.04E-01                                                    | 0.00                                                                        | 1.00E+00                                                    |
| FBgn0033928 | Arc2                | 184       | 0.03                                                                                              | 9.37E-01                                                                          | 3.19                                                                        | 8.75E-82                                                    | 0.22                                                                        | 8.41E-02                                                    |
| FBgn0038893 | Archease            | 334       | 0.25                                                                                              | 2.21E-01                                                                          | 0.63                                                                        | 7.35E-06                                                    | 0.00                                                                        | 1.00E+00                                                    |
| FBgn0013749 | Arf102F             | 1709      | -0.65                                                                                             | 3.80E-07                                                                          | -0.06                                                                       | 5.12E-01                                                    | -0.01                                                                       | 1.00E+00                                                    |
| FBgn0017418 | ari-1               | 1097      | -0.60                                                                                             | 1.00E-06                                                                          | 0.04                                                                        | 6.78E-01                                                    | 0.00                                                                        | 1.00E+00                                                    |
| FBgn0041164 | armi                | 2051      | -0.65                                                                                             | 2.47E-07                                                                          | -0.05                                                                       | 6.22E-01                                                    | 0.00                                                                        | 1.00E+00                                                    |
| FBgn0031050 | Arp10               | 640       | 0.68                                                                                              | 3.14E-04                                                                          | 0.00                                                                        | 9.77E-01                                                    | 0.00                                                                        | 1.00E+00                                                    |
| FBgn0001961 | Arpc1               | 2195      | 0.59                                                                                              | 5.56E-08                                                                          | 0.02                                                                        | 8.26E-01                                                    | -0.01                                                                       | 1.00E+00                                                    |
| FBgn0284255 | Arpc4               | 1043      | 1.13                                                                                              | 5.45E-17                                                                          | 0.08                                                                        | 3.28E-01                                                    | 0.00                                                                        | 1.00E+00                                                    |
| FBgn0031437 | Arpc5               | 1308      | 0.77                                                                                              | 7.24E-08                                                                          | 0.00                                                                        | 9.90E-01                                                    | -0.01                                                                       | 9.73E-01                                                    |
| FBgn0033062 | Ars2                | 4686      | -0.64                                                                                             | 7.16E-18                                                                          | -0.01                                                                       | 9.72E-01                                                    | 0.00                                                                        | 1.00E+00                                                    |
| FBgn0039908 | Asator              | 1415      | -0.76                                                                                             | 7.99E-10                                                                          | -0.04                                                                       | 7.13E-01                                                    | 0.00                                                                        | 1.00E+00                                                    |
| FBgn0270926 | AsnS                | 394       | 1.20                                                                                              | 2.78E-06                                                                          | 0.16                                                                        | 1.49E-01                                                    | 0.17                                                                        | 1.29E-01                                                    |
| FBgn0034793 | asrij               | 688       | 0.86                                                                                              | 1.78E-07                                                                          | 0.36                                                                        | 3.09E-03                                                    | 0.00                                                                        | 1.00E+00                                                    |
| FBgn0017424 | asRNA:CR11538       | 422       | 0.58                                                                                              | 1.49E-02                                                                          | -0.04                                                                       | 7.33E-01                                                    | 0.01                                                                        | 1.00E+00                                                    |
| FBgn0265295 | asRNA:CR42871       | 56        | -0.73                                                                                             | 4.32E-03                                                                          | 0.11                                                                        | 3.22E-01                                                    | 0.01                                                                        | 9.91E-01                                                    |
| FBgn0263344 | asRNA:CR43425       | 78        | -0.50                                                                                             | 3.31E-02                                                                          | 0.80                                                                        | 9.37E-03                                                    | 0.00                                                                        | 1.00E+00                                                    |
| FBgn0263345 | asRNA:CR43426       | 51        | 0.67                                                                                              | 1.10E-02                                                                          | 0.01                                                                        | 9.32E-01                                                    | -0.01                                                                       | 1.00E+00                                                    |
| FBgn0263445 | asRNA:CR43468       | 99        | -0.59                                                                                             | 7.51E-03                                                                          | 0.27                                                                        | 4.57E-02                                                    | 0.02                                                                        | 7.54E-01                                                    |
| FBgn0264822 | asRNA:CR44030       | 121       | -0.10                                                                                             | 7.14E-01                                                                          | 0.86                                                                        | 2.95E-04                                                    | 1.64                                                                        | 7.16E-13                                                    |
| FBgn0264823 | asRNA:CR44031       | 97        | 0.54                                                                                              | 1.87E-02                                                                          | 1.28                                                                        | 2.34E-03                                                    | 0.02                                                                        | 7.92E-01                                                    |

|             |               |       |       |          |       |          |       |          |
|-------------|---------------|-------|-------|----------|-------|----------|-------|----------|
| FBgn0264837 | asRNA:CR44045 | 82    | -0.61 | 1.50E-02 | -0.01 | 9.70E-01 | 0.01  | 1.00E+00 |
| FBgn0265499 | asRNA:CR44368 | 337   | 0.00  | 9.87E-01 | 1.03  | 2.46E-15 | -0.60 | 2.20E-04 |
| FBgn0265613 | asRNA:CR44431 | 123   | 0.83  | 5.37E-04 | -0.03 | 7.85E-01 | 0.01  | 1.00E+00 |
| FBgn0266619 | asRNA:CR45126 | 267   | -0.96 | 7.58E-07 | 2.40  | 2.95E-15 | 0.95  | 3.69E-03 |
| FBgn0266633 | asRNA:CR45140 | 31    | 0.34  | 1.70E-01 | 4.88  | 2.30E-13 | -0.02 | 8.78E-01 |
| FBgn0266681 | asRNA:CR45171 | 27    | -1.00 | 3.76E-03 | 0.34  | 9.99E-02 | 0.05  | 5.27E-01 |
| FBgn0266692 | asRNA:CR45182 | 29    | -0.64 | 1.70E-02 | -0.03 | 7.96E-01 | 0.01  | 1.00E+00 |
| FBgn0266705 | asRNA:CR45195 | 68    | 0.10  | 7.19E-01 | 7.75  | 1.00E-27 | 0.00  | 1.00E+00 |
| FBgn0267022 | asRNA:CR45466 | 32    | -0.97 | 1.72E-03 | 0.00  | 9.72E-01 | 0.00  | 1.00E+00 |
| FBgn0267160 | asRNA:CR45600 | 111   | -5.01 | 2.08E-12 | 5.59  | 1.04E-17 | 5.92  | 1.38E-19 |
| FBgn0267223 | asRNA:CR45663 | 34    | 1.49  | 3.22E-04 | 0.02  | 9.09E-01 | 0.00  | 1.00E+00 |
| FBgn0267302 | asRNA:CR45738 | 32    | 0.61  | 2.24E-02 | -0.08 | 4.91E-01 | -0.01 | 1.00E+00 |
| FBgn0267439 | asRNA:CR45789 | 35    | -0.71 | 1.03E-02 | -0.03 | 7.98E-01 | 0.00  | 1.00E+00 |
| FBgn0267485 | asRNA:CR45835 | 898   | 0.61  | 4.33E-07 | -0.03 | 7.65E-01 | 0.00  | 1.00E+00 |
| FBgn0267550 | asRNA:CR45890 | 135   | 0.74  | 2.39E-03 | -0.09 | 4.80E-01 | 0.00  | 1.00E+00 |
| FBgn0267758 | asRNA:CR46089 | 20    | 0.02  | 9.50E-01 | 6.93  | 9.49E-07 | 0.01  | 1.00E+00 |
| FBgn0015591 | AstA          | 15    | -0.47 | 4.28E-02 | -0.85 | 2.71E-02 | -0.03 | 7.69E-01 |
| FBgn0033010 | Atf6          | 1360  | -0.98 | 3.85E-07 | 0.00  | 9.95E-01 | 0.00  | 1.00E+00 |
| FBgn0037363 | Atg17         | 1079  | -0.92 | 3.17E-07 | 0.03  | 7.45E-01 | 0.00  | 1.00E+00 |
| FBgn0032422 | atilla        | 38    | 0.68  | 1.38E-02 | -0.01 | 9.56E-01 | 0.00  | 1.00E+00 |
| FBgn0016120 | ATPsynD       | 4001  | 0.89  | 1.85E-13 | -0.03 | 7.42E-01 | 0.00  | 1.00E+00 |
| FBgn0028342 | ATPsyndelta   | 2959  | 1.17  | 4.25E-42 | 0.05  | 5.61E-01 | 0.00  | 1.00E+00 |
| FBgn0038224 | ATPsynE       | 2430  | 0.91  | 4.10E-08 | -0.01 | 9.18E-01 | 0.00  | 1.00E+00 |
| FBgn0035032 | ATPsynF       | 2536  | 0.99  | 9.61E-19 | 0.00  | 9.76E-01 | 0.00  | 1.00E+00 |
| FBgn0020235 | ATPsyngamma   | 5712  | 0.73  | 9.57E-18 | 0.01  | 9.13E-01 | -0.01 | 1.00E+00 |
| FBgn0016691 | ATPsynO       | 3667  | 0.75  | 2.40E-11 | 0.01  | 9.10E-01 | 0.00  | 1.00E+00 |
| FBgn0000150 | awd           | 22227 | 0.68  | 1.45E-06 | 0.00  | 9.85E-01 | 0.00  | 1.00E+00 |
| FBgn0013751 | Awh           | 61    | -0.10 | 7.33E-01 | -1.11 | 2.95E-03 | 0.00  | 1.00E+00 |
| FBgn0004870 | bab1          | 47    | 0.12  | 6.72E-01 | -1.35 | 7.56E-05 | 0.00  | 1.00E+00 |
| FBgn0011300 | babo          | 2914  | -0.80 | 1.14E-09 | -0.04 | 7.06E-01 | 0.00  | 1.00E+00 |
| FBgn0031453 | Bacc          | 14814 | -1.10 | 3.05E-25 | 0.05  | 5.22E-01 | 0.01  | 9.02E-01 |
| FBgn0031255 | BBS8          | 105   | 0.44  | 6.81E-02 | 0.88  | 5.53E-05 | 0.01  | 1.00E+00 |
| FBgn0052594 | be            | 704   | -0.59 | 7.31E-05 | -0.07 | 4.14E-01 | 0.00  | 1.00E+00 |
| FBgn0000173 | ben           | 4467  | -0.60 | 5.15E-06 | -0.04 | 7.26E-01 | 0.00  | 1.00E+00 |
| FBgn0260860 | Bet5          | 305   | 0.66  | 1.09E-03 | 0.02  | 8.60E-01 | 0.00  | 1.00E+00 |
| FBgn0284243 | betaTub56D    | 87388 | 0.65  | 3.71E-15 | -0.02 | 8.83E-01 | -0.01 | 1.00E+00 |
| FBgn0035871 | Bl-1          | 1623  | -0.69 | 7.33E-12 | 0.30  | 5.15E-05 | 0.00  | 1.00E+00 |
| FBgn0000183 | BicD          | 2135  | -0.68 | 7.68E-09 | 0.06  | 4.83E-01 | 0.00  | 1.00E+00 |
| FBgn0024491 | Bin1          | 1697  | 0.32  | 1.04E-01 | 2.12  | 1.19E-36 | 0.00  | 1.00E+00 |
| FBgn0028262 | bjp2          | 3652  | -1.02 | 1.89E-14 | -0.07 | 3.85E-01 | 0.01  | 8.48E-01 |
| FBgn0085284 | Blos3         | 282   | 0.75  | 3.15E-04 | 0.04  | 6.56E-01 | 0.00  | 1.00E+00 |
| FBgn0036449 | bmm           | 105   | 0.20  | 4.43E-01 | -1.35 | 1.15E-03 | -0.01 | 1.00E+00 |
| FBgn0037007 | BNIP3         | 2102  | -0.67 | 5.46E-06 | 0.02  | 8.57E-01 | 0.00  | 1.00E+00 |
| FBgn0014135 | bnl           | 117   | -0.63 | 1.26E-02 | 0.02  | 8.64E-01 | 0.00  | 1.00E+00 |
| FBgn0261284 | bou           | 1262  | 0.81  | 1.17E-08 | 0.09  | 2.46E-01 | 0.00  | 1.00E+00 |
| FBgn0050169 | Brca2         | 341   | -0.64 | 8.41E-05 | 0.00  | 9.81E-01 | 0.00  | 1.00E+00 |
| FBgn0000216 | Brd           | 509   | 0.53  | 2.95E-03 | 1.17  | 7.95E-18 | 0.01  | 1.00E+00 |
| FBgn0264001 | bru3          | 51    | 0.05  | 8.22E-01 | 4.90  | 3.37E-15 | -0.01 | 1.00E+00 |
| FBgn0261822 | Bsg           | 2702  | -0.77 | 1.00E-06 | 0.00  | 9.76E-01 | 0.00  | 1.00E+00 |
| FBgn0000229 | bsk           | 1275  | -0.72 | 5.53E-12 | 0.03  | 7.89E-01 | 0.00  | 1.00E+00 |
| FBgn0000233 | btd           | 63    | 0.21  | 3.76E-01 | -2.19 | 6.57E-06 | 0.01  | 1.00E+00 |
| FBgn0023096 | btv           | 49    | -0.11 | 6.87E-01 | 0.58  | 6.50E-02 | 0.03  | 7.38E-01 |
| FBgn0259176 | bun           | 5539  | -0.70 | 3.32E-07 | -0.41 | 7.00E-04 | 0.01  | 8.66E-01 |
| FBgn0000246 | c(3)G         | 214   | -0.86 | 2.99E-05 | 0.06  | 5.01E-01 | 0.01  | 1.00E+00 |
| FBgn0004863 | C15           | 235   | 0.36  | 4.16E-02 | -0.61 | 5.84E-06 | 0.00  | 1.00E+00 |
| FBgn0263111 | cac           | 124   | 0.37  | 1.37E-01 | 3.85  | 3.50E-29 | -0.02 | 9.52E-01 |
| FBgn0053653 | Cadps         | 187   | 0.69  | 9.19E-03 | 1.58  | 2.50E-09 | 0.01  | 1.00E+00 |
| FBgn0030054 | Caf1-180      | 1658  | -0.58 | 2.62E-04 | 0.04  | 6.21E-01 | 0.01  | 1.00E+00 |
| FBgn0039928 | Cals          | 4732  | -0.77 | 1.60E-05 | -0.03 | 8.06E-01 | 0.00  | 1.00E+00 |
| FBgn0000253 | Cam           | 12315 | -1.48 | 3.62E-35 | 0.03  | 7.66E-01 | 0.00  | 1.00E+00 |
| FBgn0016126 | CaMKI         | 3031  | -0.81 | 2.36E-10 | 0.00  | 9.77E-01 | 0.01  | 1.00E+00 |
| FBgn0264607 | CaMKII        | 2738  | -0.98 | 1.88E-12 | 0.13  | 1.18E-01 | 0.08  | 2.06E-01 |
| FBgn0267912 | CanA-14F      | 856   | -0.61 | 1.02E-04 | 0.04  | 6.99E-01 | 0.00  | 1.00E+00 |
| FBgn0037831 | Cap-H2        | 1038  | -0.59 | 1.70E-07 | 0.03  | 7.58E-01 | 0.07  | 2.13E-01 |
| FBgn0004878 | cas           | 19    | 0.61  | 1.87E-02 | 0.38  | 8.83E-02 | 0.00  | 1.00E+00 |
| FBgn0285954 | caz           | 3727  | -0.58 | 1.17E-03 | 0.06  | 5.27E-01 | 0.00  | 1.00E+00 |
| FBgn0031148 | Cbs           | 2322  | 0.62  | 2.00E-17 | 0.05  | 5.13E-01 | 0.00  | 1.00E+00 |
| FBgn0030954 | CCKLR-17D3    | 380   | 0.67  | 3.15E-04 | 0.06  | 4.84E-01 | 0.00  | 1.00E+00 |
| FBgn0010621 | CCT5          | 11598 | 0.65  | 5.89E-18 | 0.05  | 5.39E-01 | -0.04 | 3.73E-01 |
| FBgn0052499 | Cda4          | 4755  | 0.63  | 7.21E-13 | 0.03  | 7.32E-01 | 0.02  | 6.49E-01 |
| FBgn0027491 | Cdk5alpha     | 35    | -0.75 | 9.09E-03 | -0.09 | 3.69E-01 | 0.00  | 1.00E+00 |
| FBgn0034437 | CG10051       | 15    | -0.03 | 8.98E-01 | -2.23 | 8.63E-03 | -0.38 | 9.09E-02 |
| FBgn0036369 | CG10089       | 215   | -0.17 | 4.09E-01 | 0.84  | 4.59E-09 | -0.35 | 2.02E-02 |
| FBgn0032800 | CG10137       | 20    | 0.26  | 2.83E-01 | 0.65  | 3.90E-02 | 0.00  | 1.00E+00 |
| FBgn0032793 | CG10189       | 280   | 0.09  | 6.85E-01 | 0.61  | 7.79E-06 | 0.00  | 1.00E+00 |
| FBgn0038454 | CG10324       | 235   | -0.83 | 9.43E-06 | 0.06  | 9.40E-01 | 0.00  | 1.00E+00 |
| FBgn0032805 | CG10337       | 141   | -0.44 | 3.08E-02 | 0.94  | 4.60E-08 | 0.00  | 1.00E+00 |
| FBgn0034972 | CG10339       | 12    | 0.07  | 6.39E-01 | 2.10  | 6.08E-04 | 1.55  | 5.81E-03 |
| FBgn0034729 | CG10344       | 43    | -0.05 | 8.66E-01 | 1.22  | 1.10E-03 | 0.05  | 4.80E-01 |

|             |         |      |       |          |       |          |       |          |
|-------------|---------|------|-------|----------|-------|----------|-------|----------|
| FBgn0033019 | CG10395 | 486  | -0.99 | 3.91E-12 | 0.15  | 5.06E-02 | 0.00  | 1.00E+00 |
| FBgn0033021 | CG10417 | 4149 | -0.87 | 9.78E-43 | -0.05 | 4.73E-01 | -0.02 | 6.07E-01 |
| FBgn0036277 | CG10418 | 472  | 0.97  | 6.82E-07 | 0.03  | 8.02E-01 | 0.00  | 1.00E+00 |
| FBgn0037531 | CG10445 | 247  | -0.36 | 7.85E-02 | 0.81  | 6.20E-08 | 0.02  | 6.24E-01 |
| FBgn0033017 | CG10465 | 1501 | -0.72 | 2.95E-08 | -0.06 | 2.95E-01 | -0.01 | 1.00E+00 |
| FBgn0039312 | CG10514 | 39   | -1.49 | 7.99E-04 | 0.02  | 8.51E-01 | 0.00  | 1.00E+00 |
| FBgn0039323 | CG10559 | 50   | 0.14  | 5.95E-01 | 1.51  | 1.14E-08 | 0.00  | 1.00E+00 |
| FBgn0032717 | CG10600 | 1849 | -0.73 | 1.91E-05 | 0.01  | 9.49E-01 | 0.00  | 1.00E+00 |
| FBgn0036290 | CG10638 | 2684 | 0.14  | 2.79E-01 | 1.24  | 2.06E-62 | 0.00  | 1.00E+00 |
| FBgn0029666 | CG10803 | 1895 | -0.74 | 7.57E-06 | -0.03 | 7.80E-01 | 0.00  | 1.00E+00 |
| FBgn0027552 | CG10863 | 209  | 0.62  | 2.02E-02 | -0.03 | 7.37E-01 | 0.01  | 1.00E+00 |
| FBgn0034312 | CG10816 | 405  | -0.21 | 2.73E-01 | 1.32  | 2.49E-27 | 0.00  | 1.00E+00 |
| FBgn0033149 | CG11060 | 14   | 0.19  | 1.86E-01 | 0.63  | 4.56E-02 | 0.00  | 1.00E+00 |
| FBgn0039930 | CG11077 | 321  | 0.68  | 3.96E-04 | 0.04  | 6.86E-01 | 0.00  | 1.00E+00 |
| FBgn0030519 | CG11151 | 1004 | 0.66  | 1.09E-04 | -0.04 | 6.70E-01 | 0.00  | 1.00E+00 |
| FBgn0039927 | CG11155 | 89   | -0.20 | 4.49E-01 | 0.59  | 1.37E-02 | -0.01 | 1.00E+00 |
| FBgn0030511 | CG11158 | 89   | -0.09 | 7.52E-01 | 1.15  | 9.94E-05 | 0.00  | 1.00E+00 |
| FBgn0034528 | CG11180 | 768  | -1.31 | 7.99E-12 | 0.06  | 4.93E-01 | 0.00  | 1.00E+00 |
| FBgn0037115 | CG11249 | 31   | -0.27 | 2.75E-01 | 0.66  | 1.81E-02 | 0.00  | 1.00E+00 |
| FBgn0036334 | CG11267 | 2756 | 0.80  | 2.32E-09 | -0.01 | 9.69E-01 | 0.00  | 1.00E+00 |
| FBgn0035552 | CG11350 | 22   | 1.08  | 2.47E-03 | 0.01  | 9.10E-01 | 0.07  | 4.10E-01 |
| FBgn0039920 | CG11360 | 3374 | -0.59 | 2.82E-03 | 0.08  | 3.43E-01 | 0.01  | 1.00E+00 |
| FBgn0037181 | CG11370 | 1620 | 0.27  | 2.29E-01 | 0.76  | 6.42E-04 | 0.14  | 1.74E-01 |
| FBgn0031224 | CG11454 | 503  | 0.73  | 1.74E-06 | 0.04  | 6.54E-01 | 0.00  | 1.00E+00 |
| FBgn0037396 | CG11459 | 40   | 0.02  | 9.37E-01 | -3.59 | 5.30E-04 | -0.36 | 9.07E-02 |
| FBgn0031244 | CG11601 | 288  | -1.03 | 8.59E-12 | 0.02  | 8.70E-01 | 0.00  | 1.00E+00 |
| FBgn0036196 | CG11658 | 72   | 0.19  | 4.82E-01 | 0.80  | 4.86E-04 | 0.00  | 1.00E+00 |
| FBgn0030311 | CG11699 | 609  | 0.68  | 5.97E-04 | 0.03  | 7.59E-01 | 0.00  | 1.00E+00 |
| FBgn0030292 | CG11752 | 421  | 0.85  | 9.10E-06 | -0.02 | 8.49E-01 | 0.00  | 1.00E+00 |
| FBgn0037603 | CG11753 | 305  | 0.71  | 1.85E-04 | 0.00  | 9.72E-01 | 0.00  | 1.00E+00 |
| FBgn0031264 | CG11835 | 652  | -0.12 | 5.99E-01 | -0.96 | 6.46E-07 | -0.07 | 2.96E-01 |
| FBgn0039299 | CG11854 | 130  | -0.09 | 5.51E-01 | -0.89 | 3.53E-02 | -0.01 | 1.00E+00 |
| FBgn0014427 | CG11899 | 2687 | 0.58  | 2.36E-04 | -0.04 | 6.96E-01 | -0.04 | 4.40E-01 |
| FBgn0037312 | CG11999 | 699  | 0.71  | 3.22E-04 | 0.09  | 3.31E-01 | 0.00  | 1.00E+00 |
| FBgn0039831 | CG12054 | 2044 | -0.78 | 9.35E-06 | -0.01 | 9.62E-01 | 0.00  | 1.00E+00 |
| FBgn0030098 | CG12057 | 41   | 0.04  | 6.75E-01 | -3.13 | 4.56E-03 | -1.77 | 1.09E-02 |
| FBgn0037386 | CG1208  | 54   | 3.54  | 4.06E-08 | 1.32  | 3.43E-03 | 0.00  | 1.00E+00 |
| FBgn0030048 | CG12112 | 271  | -0.85 | 7.80E-06 | 0.12  | 1.48E-01 | 0.00  | 1.00E+00 |
| FBgn0030097 | CG12115 | 11   | -0.08 | 5.01E-01 | -5.99 | 2.31E-05 | -3.05 | 1.15E-03 |
| FBgn0037356 | CG12170 | 204  | 0.70  | 6.12E-04 | 0.03  | 8.04E-01 | 0.01  | 1.00E+00 |
| FBgn0037354 | CG12171 | 763  | 1.03  | 5.36E-13 | 0.75  | 1.51E-13 | 0.00  | 1.00E+00 |
| FBgn0030510 | CG12177 | 62   | 0.10  | 7.32E-01 | 0.76  | 2.59E-03 | 0.00  | 1.00E+00 |
| FBgn0031022 | CG12204 | 290  | 1.03  | 3.81E-07 | 0.43  | 5.96E-03 | 0.01  | 9.42E-01 |
| FBgn0037974 | CG12224 | 199  | -0.04 | 9.02E-01 | 2.01  | 3.75E-30 | 0.00  | 1.00E+00 |
| FBgn0036514 | CG12301 | 779  | -0.59 | 1.10E-03 | 0.09  | 2.87E-01 | 0.00  | 1.00E+00 |
| FBgn0038590 | CG12320 | 383  | 0.61  | 4.18E-04 | 0.06  | 4.68E-01 | 0.00  | 1.00E+00 |
| FBgn0033558 | CG12344 | 18   | -0.73 | 1.06E-02 | -0.07 | 5.45E-01 | 0.00  | 1.00E+00 |
| FBgn0029657 | CG12535 | 259  | -2.49 | 3.99E-31 | 0.04  | 6.98E-01 | 0.00  | 1.00E+00 |
| FBgn0250830 | CG12547 | 2267 | -0.82 | 2.09E-21 | 0.05  | 5.86E-01 | 0.00  | 1.00E+00 |
| FBgn0037811 | CG12592 | 84   | -5.00 | 3.37E-05 | -0.04 | 6.97E-01 | -0.01 | 1.00E+00 |
| FBgn0037796 | CG12814 | 1934 | -0.66 | 1.10E-11 | 0.05  | 5.48E-01 | 0.03  | 5.19E-01 |
| FBgn0033145 | CG12828 | 151  | 0.87  | 1.14E-04 | -0.05 | 6.52E-01 | -0.02 | 8.92E-01 |
| FBgn0033945 | CG12868 | 154  | -0.36 | 1.17E-01 | 1.52  | 3.95E-16 | 0.00  | 1.00E+00 |
| FBgn0033547 | CG12935 | 370  | 1.10  | 1.08E-10 | -0.02 | 8.88E-01 | 0.00  | 1.00E+00 |
| FBgn0037753 | CG12947 | 202  | -0.18 | 4.28E-01 | -0.63 | 3.27E-04 | 0.00  | 1.00E+00 |
| FBgn0035501 | CG1299  | 414  | 0.26  | 2.45E-01 | 1.01  | 2.72E-08 | 0.00  | 1.00E+00 |
| FBgn0030859 | CG12990 | 39   | -1.81 | 3.29E-05 | 0.02  | 8.45E-01 | 0.00  | 1.00E+00 |
| FBgn0036677 | CG13023 | 385  | 2.05  | 7.22E-11 | -0.32 | 5.69E-02 | -0.14 | 1.79E-01 |
| FBgn0036670 | CG13029 | 41   | 0.35  | 1.31E-01 | 2.92  | 1.84E-18 | 0.12  | 2.40E-01 |
| FBgn0036605 | CG13041 | 54   | 1.02  | 3.83E-03 | -0.07 | 4.61E-01 | -0.40 | 3.96E-02 |
| FBgn0036599 | CG13044 | 661  | 0.68  | 4.80E-03 | 0.05  | 5.92E-01 | 0.02  | 8.05E-01 |
| FBgn0036596 | CG13045 | 48   | -0.59 | 2.66E-02 | -0.06 | 5.40E-01 | -0.01 | 1.00E+00 |
| FBgn0036660 | CG13045 | 470  | -0.83 | 4.04E-09 | 0.18  | 4.71E-02 | 0.13  | 1.00E-01 |
| FBgn0040801 | CG13053 | 118  | 0.97  | 1.90E-03 | -0.96 | 9.37E-03 | -1.91 | 1.24E-04 |
| FBgn0040796 | CG13064 | 52   | 0.81  | 5.07E-03 | 0.05  | 6.12E-01 | 0.00  | 1.00E+00 |
| FBgn0036589 | CG13067 | 78   | 0.87  | 4.69E-03 | 0.06  | 5.01E-01 | 1.27  | 1.22E-05 |
| FBgn0032803 | CG13082 | 663  | 0.62  | 4.19E-03 | -0.07 | 4.59E-01 | 0.00  | 1.00E+00 |
| FBgn0032051 | CG13097 | 1071 | -0.63 | 3.97E-06 | 0.08  | 3.18E-01 | 0.00  | 1.00E+00 |
| FBgn0033608 | CG13220 | 1046 | 0.59  | 1.39E-06 | 0.05  | 5.80E-01 | 0.00  | 1.00E+00 |
| FBgn0033781 | CG13319 | 429  | 0.85  | 1.59E-05 | 0.03  | 7.98E-01 | 0.00  | 1.00E+00 |
| FBgn0029531 | CG13362 | 69   | -0.74 | 3.92E-03 | 0.03  | 7.39E-01 | -0.04 | 6.33E-01 |
| FBgn0028879 | CG13364 | 1664 | 0.76  | 6.87E-06 | 0.00  | 9.93E-01 | 0.00  | 1.00E+00 |
| FBgn0025640 | CG13369 | 355  | 0.63  | 8.83E-04 | -0.01 | 9.12E-01 | 0.00  | 1.00E+00 |
| FBgn0040658 | CG13516 | 84   | 0.91  | 8.75E-04 | -2.22 | 4.86E-15 | -3.17 | 1.48E-27 |
| FBgn0035010 | CG13579 | 278  | -0.03 | 8.28E-01 | 11.51 | 4.85E-23 | 0.00  | 1.00E+00 |
| FBgn0035020 | CG13585 | 575  | 0.95  | 4.94E-11 | 0.13  | 1.02E-01 | 0.02  | 7.52E-01 |
| FBgn0039219 | CG13630 | 1091 | 0.64  | 1.67E-09 | 0.10  | 1.19E-01 | 0.00  | 1.00E+00 |
| FBgn0035859 | CG13678 | 134  | 1.06  | 1.15E-03 | 0.02  | 8.64E-01 | 0.09  | 3.13E-01 |
| FBgn0030539 | CG1368  | 104  | 0.83  | 4.40E-03 | -1.49 | 1.89E-04 | -0.01 | 1.00E+00 |

|             |         |      |        |          |       |          |       |          |
|-------------|---------|------|--------|----------|-------|----------|-------|----------|
| FBgn0031254 | CG13692 | 54   | 0.04   | 8.97E-01 | 1.31  | 2.65E-05 | 0.01  | 1.00E+00 |
| FBgn0035553 | CG13722 | 58   | 0.93   | 4.69E-03 | -0.23 | 1.74E-01 | -0.13 | 2.10E-01 |
| FBgn0036382 | CG13737 | 57   | 0.62   | 1.26E-02 | 0.04  | 6.72E-01 | 0.00  | 1.00E+00 |
| FBgn0033340 | CG13751 | 510  | 1.29   | 9.93E-08 | 0.03  | 7.26E-01 | 0.00  | 1.00E+00 |
| FBgn0031834 | CG13766 | 269  | -1.05  | 7.32E-11 | -0.06 | 5.06E-01 | 0.00  | 1.00E+00 |
| FBgn0035176 | CG13905 | 32   | 1.11   | 1.36E-03 | 0.01  | 9.54E-01 | 0.00  | 1.00E+00 |
| FBgn0040786 | CG14104 | 193  | 1.28   | 2.01E-07 | -0.08 | 3.84E-01 | -0.01 | 1.00E+00 |
| FBgn0040817 | CG14132 | 340  | 0.11   | 6.73E-01 | -0.62 | 1.97E-03 | -0.03 | 5.64E-01 |
| FBgn0038658 | CG14292 | 69   | -1.15  | 1.15E-03 | 0.06  | 6.08E-01 | 0.00  | 1.00E+00 |
| FBgn0038647 | CG14302 | 16   | -0.04  | 7.60E-01 | -1.37 | 2.08E-02 | -0.01 | 1.00E+00 |
| FBgn0038629 | CG14304 | 297  | 0.08   | 7.08E-01 | 0.62  | 1.63E-05 | 0.00  | 1.00E+00 |
| FBgn0038581 | CG14314 | 75   | -0.47  | 5.04E-02 | 1.19  | 4.26E-05 | 0.00  | 1.00E+00 |
| FBgn0038148 | CG14377 | 80   | -1.02  | 2.52E-04 | -0.09 | 4.73E-01 | -0.01 | 1.00E+00 |
| FBgn0032900 | CG14401 | 26   | -0.99  | 2.51E-03 | -0.02 | 8.90E-01 | -0.01 | 1.00E+00 |
| FBgn0030584 | CG14407 | 427  | 0.78   | 1.12E-04 | 0.00  | 9.86E-01 | 0.00  | 1.00E+00 |
| FBgn0029894 | CG14440 | 648  | -0.66  | 2.53E-05 | -0.01 | 9.13E-01 | 0.00  | 1.00E+00 |
| FBgn0033000 | CG14464 | 898  | -0.68  | 2.86E-05 | 0.04  | 7.03E-01 | 0.00  | 1.00E+00 |
| FBgn0037127 | CG14566 | 326  | 1.00   | 4.07E-05 | -0.02 | 8.40E-01 | 0.52  | 1.64E-02 |
| FBgn0037503 | CG14598 | 331  | 1.24   | 1.79E-12 | -0.18 | 6.31E-02 | 0.00  | 1.00E+00 |
| FBgn0031184 | CG14615 | 61   | -0.84  | 2.10E-03 | -0.02 | 8.61E-01 | -0.03 | 6.96E-01 |
| FBgn0037850 | CG14695 | 97   | 0.09   | 5.32E-01 | 7.33  | 1.55E-43 | 0.03  | 7.36E-01 |
| FBgn0037930 | CG14715 | 686  | 0.87   | 8.24E-08 | -0.03 | 7.95E-01 | -0.01 | 1.00E+00 |
| FBgn0033243 | CG14763 | 94   | -0.69  | 4.53E-03 | -0.06 | 6.21E-01 | 0.00  | 1.00E+00 |
| FBgn0038455 | CG14907 | 184  | -0.29  | 2.10E-01 | 0.97  | 2.91E-09 | -0.13 | 1.54E-01 |
| FBgn0032335 | CG14915 | 24   | 0.28   | 2.37E-01 | 0.64  | 2.32E-02 | 0.02  | 9.05E-01 |
| FBgn0035409 | CG14963 | 27   | 0.00   | 9.87E-01 | 0.01  | 9.11E-01 | 0.69  | 4.79E-02 |
| FBgn0035414 | CG14965 | 340  | -0.68  | 9.14E-05 | -0.02 | 8.87E-01 | 0.00  | 1.00E+00 |
| FBgn0035415 | CG14966 | 318  | -0.70  | 7.73E-05 | -0.03 | 7.86E-01 | -0.01 | 9.03E-01 |
| FBgn0035469 | CG14977 | 355  | 0.66   | 3.70E-04 | 0.01  | 9.69E-01 | -0.01 | 1.00E+00 |
| FBgn0035480 | CG14984 | 277  | 0.75   | 9.39E-04 | 0.23  | 5.87E-02 | 0.01  | 1.00E+00 |
| FBgn0034399 | CG15083 | 584  | 0.79   | 1.63E-04 | 0.02  | 8.17E-01 | 0.00  | 1.00E+00 |
| FBgn0032733 | CG15170 | 18   | 0.02   | 9.12E-01 | -2.23 | 8.48E-03 | -0.18 | 1.79E-01 |
| FBgn0030234 | CG15211 | 42   | 0.60   | 2.38E-02 | 0.00  | 9.86E-01 | 0.01  | 1.00E+00 |
| FBgn0033104 | CG15237 | 463  | 0.71   | 3.29E-05 | 0.03  | 8.00E-01 | 0.00  | 1.00E+00 |
| FBgn0030183 | CG15309 | 348  | -1.15  | 2.11E-07 | 0.03  | 7.91E-01 | 0.00  | 1.00E+00 |
| FBgn0030029 | CG15343 | 65   | -0.08  | 7.69E-01 | -1.24 | 6.05E-03 | -0.01 | 1.00E+00 |
| FBgn0030040 | CG15347 | 54   | 4.74   | 6.59E-09 | 0.00  | 9.83E-01 | -0.03 | 7.54E-01 |
| FBgn0040718 | CG15353 | 3826 | 0.82   | 1.11E-05 | 0.03  | 7.62E-01 | 0.61  | 2.02E-03 |
| FBgn0031393 | CG15382 | 81   | -0.62  | 8.94E-03 | -0.11 | 2.88E-01 | -0.01 | 1.00E+00 |
| FBgn0039828 | CG1542  | 1295 | 0.67   | 1.31E-06 | 0.06  | 5.20E-01 | -0.01 | 1.00E+00 |
| FBgn0029719 | CG15473 | 26   | 0.74   | 8.74E-03 | 0.00  | 9.77E-01 | 0.00  | 1.00E+00 |
| FBgn0039807 | CG15546 | 179  | 0.73   | 3.79E-04 | 0.75  | 4.93E-04 | 0.03  | 6.76E-01 |
| FBgn0031632 | CG15628 | 830  | -0.69  | 6.10E-05 | -0.02 | 8.10E-01 | 0.02  | 6.86E-01 |
| FBgn0030309 | CG1572  | 778  | 0.65   | 7.98E-06 | -0.10 | 1.88E-01 | 0.00  | 1.00E+00 |
| FBgn0029766 | CG15784 | 8033 | 0.41   | 1.73E-02 | 5.32  | 0.00E+00 | 0.61  | 6.92E-05 |
| FBgn0030246 | CG1582  | 1397 | 0.03   | 8.89E-01 | 0.74  | 2.03E-15 | 0.01  | 1.00E+00 |
| FBgn0038814 | CG15923 | 256  | -1.32  | 5.53E-08 | 0.07  | 5.34E-01 | 0.01  | 1.00E+00 |
| FBgn0033191 | CG1598  | 1089 | 0.60   | 9.56E-06 | 0.05  | 5.99E-01 | 0.00  | 1.00E+00 |
| FBgn0039602 | CG1647  | 659  | -0.61  | 1.64E-05 | 0.03  | 7.46E-01 | 0.01  | 1.00E+00 |
| FBgn0038719 | CG16727 | 101  | -13.72 | 9.08E-07 | 0.00  | 9.77E-01 | 0.00  | 1.00E+00 |
| FBgn0032488 | CG16812 | 796  | -0.63  | 2.20E-08 | 0.05  | 5.27E-01 | 0.00  | 1.00E+00 |
| FBgn0032495 | CG16820 | 141  | -0.22  | 3.58E-01 | 1.11  | 4.35E-10 | -0.63 | 3.41E-03 |
| FBgn0030321 | CG1703  | 2733 | -0.59  | 3.11E-05 | 0.17  | 5.48E-02 | 0.00  | 1.00E+00 |
| FBgn0040496 | CG17104 | 334  | -0.16  | 5.23E-01 | 1.06  | 2.36E-07 | 0.00  | 1.00E+00 |
| FBgn0036440 | CG17177 | 11   | -0.03  | 8.46E-01 | 6.67  | 3.10E-06 | 0.00  | 1.00E+00 |
| FBgn0038043 | CG17202 | 1061 | 0.69   | 2.76E-04 | 0.01  | 9.18E-01 | 0.00  | 1.00E+00 |
| FBgn0039977 | CG17454 | 820  | -0.64  | 7.83E-09 | 0.13  | 4.25E-02 | 0.00  | 1.00E+00 |
| FBgn0032997 | CG17486 | 1168 | -0.59  | 1.85E-06 | 0.00  | 9.88E-01 | 0.00  | 1.00E+00 |
| FBgn0039959 | CG17514 | 7525 | -0.60  | 2.64E-04 | 0.03  | 7.60E-01 | 0.00  | 1.00E+00 |
| FBgn0261387 | CG17528 | 2579 | -0.62  | 4.04E-09 | -0.01 | 9.46E-01 | 0.00  | 1.00E+00 |
| FBgn0033777 | CG17574 | 551  | 0.29   | 8.95E-02 | 0.91  | 1.94E-17 | -0.67 | 1.94E-08 |
| FBgn0031597 | CG17612 | 367  | -0.72  | 9.48E-06 | 0.04  | 7.15E-01 | 0.01  | 1.00E+00 |
| FBgn0263780 | CG17684 | 127  | -0.31  | 1.98E-01 | 1.48  | 1.26E-18 | -0.11 | 1.79E-01 |
| FBgn0040056 | CG17698 | 1191 | -0.96  | 1.17E-14 | -0.06 | 4.28E-01 | 0.00  | 1.00E+00 |
| FBgn0033802 | CG17724 | 203  | -1.43  | 3.95E-06 | 0.06  | 4.74E-01 | 0.00  | 1.00E+00 |
| FBgn0038718 | CG17752 | 65   | -2.13  | 4.83E-04 | 0.02  | 8.61E-01 | 0.00  | 1.00E+00 |
| FBgn0040899 | CG17776 | 374  | 1.06   | 1.51E-06 | 0.02  | 8.65E-01 | 0.00  | 1.00E+00 |
| FBgn0040005 | CG17883 | 1756 | -0.62  | 7.07E-07 | 0.09  | 2.41E-01 | 0.00  | 1.00E+00 |
| FBgn0028856 | CG18063 | 238  | -0.83  | 8.28E-01 | 8.80  | 7.19E-73 | -0.03 | 7.66E-01 |
| FBgn0038470 | CG18213 | 611  | -0.08  | 7.21E-01 | 0.82  | 1.62E-08 | 0.00  | 1.00E+00 |
| FBgn0033431 | CG1827  | 277  | 1.05   | 3.97E-06 | -0.04 | 6.56E-01 | 0.00  | 1.00E+00 |
| FBgn0030351 | CG1840  | 156  | -0.65  | 5.29E-03 | -0.01 | 9.48E-01 | 0.00  | 1.00E+00 |
| FBgn0037973 | CG18547 | 919  | 0.26   | 1.35E-01 | 1.90  | 8.11E-70 | -0.01 | 1.00E+00 |
| FBgn0031929 | CG18585 | 13   | -0.02  | 8.82E-01 | -1.09 | 2.80E-02 | -0.09 | 3.38E-01 |
| FBgn0033421 | CG1888  | 455  | 0.63   | 3.47E-04 | 0.01  | 9.03E-01 | 0.00  | 1.00E+00 |
| FBgn0039911 | CG1909  | 92   | 0.51   | 4.75E-02 | 3.31  | 4.98E-37 | 0.04  | 5.75E-01 |
| FBgn0022349 | CG1910  | 5653 | -0.77  | 1.49E-09 | -0.01 | 9.26E-01 | 0.00  | 1.00E+00 |
| FBgn0039881 | CG1971  | 10   | -0.03  | 9.12E-01 | 0.70  | 3.73E-02 | 0.00  | 1.00E+00 |
| FBgn0039886 | CG2003  | 66   | 0.01   | 9.87E-01 | -0.65 | 4.84E-03 | -0.09 | 2.74E-01 |

|             |         |      |        |          |       |           |       |          |
|-------------|---------|------|--------|----------|-------|-----------|-------|----------|
| FBgn0039664 | CG2006  | 513  | 0.76   | 3.00E-05 | 0.01  | 9.46E-01  | 0.00  | 1.00E+00 |
| FBgn0035271 | CG2021  | 304  | 0.65   | 5.50E-04 | 0.02  | 8.14E-01  | 0.00  | 1.00E+00 |
| FBgn0033205 | CG2064  | 103  | -0.13  | 6.35E-01 | 1.83  | 6.35E-21  | 0.00  | 1.00E+00 |
| FBgn0017448 | CG2187  | 56   | 0.76   | 7.19E-03 | 1.48  | 2.14E-05  | 1.25  | 4.85E-04 |
| FBgn0030447 | CG2200  | 465  | 0.66   | 5.82E-05 | -0.04 | 7.06E-01  | -0.01 | 1.00E+00 |
| FBgn0039665 | CG2310  | 1991 | 0.82   | 6.19E-05 | 0.02  | 8.88E-01  | 0.00  | 1.00E+00 |
| FBgn0034931 | CG2812  | 789  | 0.77   | 1.36E-07 | 0.55  | 9.49E-07  | 0.52  | 2.63E-05 |
| FBgn0023526 | CG2865  | 935  | -0.93  | 1.42E-06 | 0.02  | 8.50E-01  | 0.01  | 1.00E+00 |
| FBgn0029679 | CG2901  | 32   | 1.17   | 2.64E-03 | 0.06  | 5.87E-01  | -0.01 | 1.00E+00 |
| FBgn0030189 | CG2909  | 129  | 0.00   | 9.91E-01 | 1.71  | 1.07E-19  | 0.01  | 1.00E+00 |
| FBgn0023528 | CG2924  | 2315 | -0.73  | 1.93E-12 | -0.05 | 5.33E-01  | 0.00  | 1.00E+00 |
| FBgn0031643 | CG3008  | 1831 | -0.27  | 1.20E-02 | 1.75  | 8.62E-147 | 0.01  | 9.62E-01 |
| FBgn0050187 | CG30187 | 266  | -0.12  | 6.49E-01 | 1.68  | 1.49E-24  | 0.00  | 1.00E+00 |
| FBgn0050196 | CG30196 | 60   | 0.19   | 2.15E-01 | 2.12  | 1.75E-11  | 0.08  | 3.26E-01 |
| FBgn0050197 | CG30197 | 45   | 0.25   | 3.20E-01 | -2.87 | 5.43E-10  | 0.00  | 1.00E+00 |
| FBgn0031645 | CG3036  | 831  | 0.87   | 2.51E-06 | 0.65  | 6.15E-05  | -0.01 | 8.88E-01 |
| FBgn0050424 | CG30424 | 15   | -0.20  | 3.78E-01 | -1.39 | 6.47E-03  | -0.01 | 1.00E+00 |
| FBgn0050428 | CG30428 | 190  | -0.09  | 7.38E-01 | 0.65  | 6.52E-04  | 0.86  | 1.95E-05 |
| FBgn0050440 | CG30440 | 2603 | -0.80  | 1.00E-14 | -0.07 | 3.70E-01  | 0.00  | 1.00E+00 |
| FBgn0034816 | CG3085  | 164  | 0.45   | 2.53E-02 | 0.73  | 1.11E-06  | 0.00  | 1.00E+00 |
| FBgn0051030 | CG31030 | 110  | -0.64  | 1.41E-02 | -0.16 | 1.63E-01  | 0.00  | 1.00E+00 |
| FBgn0051055 | CG31055 | 196  | 0.70   | 1.15E-03 | -0.04 | 7.60E-01  | 0.00  | 1.00E+00 |
| FBgn0033005 | CG3107  | 2743 | -0.71  | 1.56E-07 | -0.01 | 9.10E-01  | 0.00  | 1.00E+00 |
| FBgn0051076 | CG31076 | 39   | 0.06   | 8.28E-01 | -0.05 | 5.92E-01  | -2.80 | 1.70E-05 |
| FBgn0051126 | CG31126 | 212  | 0.76   | 3.03E-04 | 0.02  | 8.97E-01  | 0.00  | 1.00E+00 |
| FBgn0047114 | CG31142 | 452  | 0.13   | 5.07E-01 | 0.59  | 2.76E-05  | -0.01 | 9.42E-01 |
| FBgn0051156 | CG31156 | 386  | -0.80  | 1.01E-06 | 0.03  | 7.46E-01  | 0.00  | 1.00E+00 |
| FBgn0051157 | CG31157 | 19   | 4.04   | 1.52E-04 | 0.08  | 5.01E-01  | 0.01  | 1.00E+00 |
| FBgn0051391 | CG31391 | 23   | -0.69  | 1.21E-02 | 0.00  | 9.88E-01  | 0.00  | 1.00E+00 |
| FBgn0051431 | CG31431 | 21   | -0.13  | 5.83E-01 | -0.81 | 2.70E-02  | 0.00  | 1.00E+00 |
| FBgn0051467 | CG31467 | 117  | -0.64  | 7.42E-03 | 0.00  | 9.83E-01  | 0.00  | 1.00E+00 |
| FBgn0051510 | CG31510 | 942  | -1.10  | 4.98E-15 | -0.09 | 2.64E-01  | 0.00  | 1.00E+00 |
| FBgn0051548 | CG31548 | 553  | 0.68   | 1.35E-05 | 0.02  | 8.45E-01  | 0.00  | 1.00E+00 |
| FBgn0051549 | CG31549 | 582  | 0.18   | 2.97E-01 | 0.93  | 1.89E-23  | 0.00  | 1.00E+00 |
| FBgn0051559 | CG31559 | 89   | 0.07   | 8.26E-01 | -0.59 | 2.16E-02  | -0.02 | 8.81E-01 |
| FBgn0051633 | CG31633 | 109  | 0.66   | 6.96E-03 | 0.14  | 1.73E-01  | 0.01  | 1.00E+00 |
| FBgn0029896 | CG3168  | 768  | 0.19   | 4.55E-01 | 1.17  | 3.76E-06  | 0.00  | 1.00E+00 |
| FBgn0051898 | CG31898 | 120  | -0.71  | 1.78E-03 | 0.04  | 7.04E-01  | 0.01  | 1.00E+00 |
| FBgn0031360 | CG31937 | 567  | 0.78   | 1.14E-07 | 0.01  | 9.51E-01  | 0.00  | 1.00E+00 |
| FBgn0051955 | CG31955 | 41   | 0.02   | 9.57E-01 | -0.16 | 2.03E-01  | -1.28 | 1.29E-03 |
| FBgn0051997 | CG31997 | 2776 | 0.64   | 9.55E-06 | 0.08  | 3.37E-01  | -0.14 | 9.82E-02 |
| FBgn0051998 | CG31998 | 3283 | -0.73  | 1.38E-04 | 0.00  | 9.83E-01  | 0.01  | 1.00E+00 |
| FBgn0051999 | CG31999 | 642  | 0.48   | 4.40E-04 | 0.94  | 7.82E-23  | -0.52 | 3.45E-06 |
| FBgn0052017 | CG32017 | 50   | -0.13  | 6.30E-01 | 1.88  | 8.72E-06  | 0.03  | 6.95E-01 |
| FBgn0052055 | CG32055 | 76   | 0.88   | 1.45E-03 | -1.68 | 1.85E-07  | -2.31 | 1.15E-12 |
| FBgn0052069 | CG32069 | 283  | 0.66   | 8.71E-04 | 0.00  | 9.89E-01  | -0.01 | 1.00E+00 |
| FBgn0052095 | CG32095 | 635  | -0.64  | 3.32E-07 | 0.01  | 9.67E-01  | 0.00  | 1.00E+00 |
| FBgn0052163 | CG32163 | 213  | 0.66   | 1.33E-03 | 0.01  | 9.06E-01  | 0.00  | 1.00E+00 |
| FBgn0052176 | CG32176 | 526  | -0.83  | 1.30E-07 | 0.02  | 8.39E-01  | 0.00  | 1.00E+00 |
| FBgn0052243 | CG32243 | 1236 | -0.76  | 1.70E-15 | 0.01  | 9.47E-01  | -0.01 | 1.00E+00 |
| FBgn0052354 | CG32354 | 120  | 0.18   | 4.83E-01 | 0.68  | 4.05E-03  | 0.73  | 5.80E-03 |
| FBgn0041706 | CG3253  | 101  | 0.07   | 8.05E-01 | 1.71  | 4.60E-19  | -0.01 | 9.62E-01 |
| FBgn0052532 | CG32532 | 10   | -0.17  | 4.17E-01 | 5.19  | 1.02E-04  | 4.29  | 1.22E-03 |
| FBgn0052544 | CG32544 | 30   | -0.69  | 1.34E-02 | 0.00  | 9.85E-01  | -0.01 | 1.00E+00 |
| FBgn0052549 | CG32549 | 668  | 0.19   | 4.29E-01 | 1.12  | 1.39E-07  | -0.02 | 8.49E-01 |
| FBgn0032986 | CG3262  | 1798 | -0.61  | 1.50E-16 | 0.23  | 1.11E-05  | 0.02  | 5.82E-01 |
| FBgn0052625 | CG32625 | 10   | -0.04  | 8.29E-01 | 2.22  | 9.92E-04  | 0.00  | 1.00E+00 |
| FBgn0052694 | CG32694 | 95   | 0.22   | 3.56E-01 | -0.84 | 2.94E-04  | 0.00  | 1.00E+00 |
| FBgn0052850 | CG32850 | 772  | -1.46  | 4.07E-37 | 0.05  | 5.76E-01  | 0.00  | 1.00E+00 |
| FBgn0053225 | CG33225 | 21   | 0.60   | 1.61E-02 | 0.15  | 2.63E-01  | 0.00  | 1.00E+00 |
| FBgn0053281 | CG33281 | 14   | -10.96 | 7.84E-06 | 0.05  | 6.42E-01  | 0.01  | 1.00E+00 |
| FBgn0053509 | CG33509 | 743  | -0.64  | 6.34E-04 | 1.82  | 4.17E-46  | 0.19  | 6.27E-02 |
| FBgn0031619 | CG3355  | 63   | 0.66   | 1.35E-02 | -0.04 | 6.88E-01  | 0.00  | 1.00E+00 |
| FBgn0052831 | CG33695 | 761  | 0.62   | 7.88E-05 | -0.02 | 8.24E-01  | 0.00  | 1.00E+00 |
| FBgn0262731 | CG33941 | 610  | -1.36  | 5.20E-10 | 0.05  | 5.38E-01  | 0.00  | 1.00E+00 |
| FBgn0053978 | CG33978 | 6959 | -0.69  | 2.06E-04 | 0.11  | 2.26E-01  | 0.04  | 4.82E-01 |
| FBgn0085192 | CG34163 | 279  | -0.70  | 1.49E-03 | 0.00  | 9.76E-01  | 0.00  | 1.00E+00 |
| FBgn0033100 | CG3420  | 534  | 0.60   | 6.60E-04 | 0.03  | 8.04E-01  | 0.00  | 1.00E+00 |
| FBgn0085236 | CG34207 | 212  | -0.84  | 3.04E-05 | -0.02 | 8.28E-01  | 0.00  | 1.00E+00 |
| FBgn0085276 | CG34247 | 87   | 4.23   | 8.81E-18 | 0.05  | 5.80E-01  | -1.88 | 7.16E-04 |
| FBgn0085411 | CG34382 | 59   | 0.85   | 1.89E-03 | -1.48 | 1.98E-05  | -1.22 | 2.36E-04 |
| FBgn0085452 | CG34423 | 18   | 0.32   | 1.61E-01 | -0.96 | 1.15E-02  | -1.98 | 2.34E-04 |
| FBgn0035996 | CG3448  | 164  | -0.30  | 1.51E-01 | 1.45  | 4.49E-18  | -0.01 | 1.00E+00 |
| FBgn0024984 | CG3457  | 47   | 1.34   | 1.07E-04 | 1.75  | 3.05E-08  | 0.00  | 1.00E+00 |
| FBgn0035007 | CG3492  | 22   | -0.03  | 8.41E-01 | 7.08  | 6.14E-09  | -0.01 | 1.00E+00 |
| FBgn0035008 | CG3494  | 13   | 0.00   | 1.00E+00 | 7.85  | 3.38E-08  | 0.00  | 1.00E+00 |
| FBgn0034849 | CG3500  | 293  | 0.62   | 1.41E-03 | 0.01  | 9.05E-01  | 0.00  | 1.00E+00 |
| FBgn0035063 | CG3594  | 504  | 0.59   | 1.16E-03 | 0.06  | 4.53E-01  | 0.00  | 1.00E+00 |
| FBgn0029824 | CG3726  | 143  | 0.27   | 2.31E-01 | 0.78  | 5.21E-05  | 0.03  | 5.79E-01 |

|             |         |      |       |          |       |           |       |          |
|-------------|---------|------|-------|----------|-------|-----------|-------|----------|
| FBgn0035085 | CG3770  | 365  | 0.18  | 3.02E-01 | -0.79 | 4.13E-11  | -0.03 | 5.47E-01 |
| FBgn0036422 | CG3868  | 17   | -0.06 | 6.16E-01 | -1.60 | 1.44E-02  | -0.28 | 1.22E-01 |
| FBgn0058160 | CG40160 | 3127 | -0.80 | 2.78E-16 | -0.05 | 5.08E-01  | -0.01 | 9.40E-01 |
| FBgn0058191 | CG40191 | 1684 | -0.60 | 5.47E-08 | -0.06 | 4.68E-01  | 0.00  | 1.00E+00 |
| FBgn0035986 | CG4022  | 1651 | -0.83 | 7.91E-10 | -0.06 | 4.64E-01  | -0.01 | 9.41E-01 |
| FBgn0063670 | CG40228 | 993  | -1.01 | 2.80E-10 | 0.02  | 8.24E-01  | 0.00  | 1.00E+00 |
| FBgn0039955 | CG41099 | 2624 | -0.75 | 2.20E-08 | -0.07 | 4.01E-01  | 0.00  | 1.00E+00 |
| FBgn0087011 | CG41520 | 382  | -0.08 | 7.78E-01 | 0.72  | 3.67E-04  | -0.02 | 7.95E-01 |
| FBgn0038302 | CG4210  | 304  | 0.06  | 8.08E-01 | 0.84  | 6.58E-11  | 0.01  | 9.40E-01 |
| FBgn0250862 | CG42237 | 12   | -0.60 | 2.25E-02 | -0.05 | 6.20E-01  | 0.00  | 1.00E+00 |
| FBgn0259143 | CG42258 | 765  | -1.18 | 1.27E-20 | 0.02  | 8.81E-01  | 0.00  | 1.00E+00 |
| FBgn0266569 | CG42259 | 221  | -0.77 | 2.05E-03 | 0.02  | 8.22E-01  | 0.00  | 1.00E+00 |
| FBgn0259222 | CG42322 | 26   | -0.66 | 1.61E-02 | 0.03  | 8.02E-01  | 0.01  | 1.00E+00 |
| FBgn0259742 | CG42360 | 459  | -0.79 | 9.71E-08 | 0.07  | 4.15E-01  | 0.00  | 1.00E+00 |
| FBgn0259711 | CG42365 | 141  | -0.21 | 3.83E-01 | 1.18  | 2.56E-11  | 0.00  | 1.00E+00 |
| FBgn0034761 | CG4250  | 49   | 0.70  | 1.17E-02 | 0.09  | 3.74E-01  | 0.01  | 1.00E+00 |
| FBgn0260768 | CG42566 | 16   | 0.14  | 5.66E-01 | -1.69 | 2.81E-03  | -0.84 | 1.90E-02 |
| FBgn0034741 | CG4269  | 32   | -1.33 | 1.99E-03 | -0.02 | 8.60E-01  | 0.01  | 1.00E+00 |
| FBgn0261584 | CG42694 | 19   | -0.16 | 5.02E-01 | -0.86 | 2.34E-02  | 0.00  | 1.00E+00 |
| FBgn0261641 | CG42724 | 4450 | -0.87 | 2.78E-09 | 0.02  | 8.50E-01  | 0.00  | 1.00E+00 |
| FBgn0261995 | CG42813 | 479  | 0.60  | 7.35E-04 | 0.01  | 9.46E-01  | 0.00  | 1.00E+00 |
| FBgn0034742 | CG4294  | 1630 | -0.72 | 3.08E-08 | 0.18  | 3.61E-02  | 0.02  | 7.92E-01 |
| FBgn0038784 | CG4362  | 57   | 0.04  | 8.38E-01 | -1.24 | 1.81E-02  | -0.59 | 5.15E-02 |
| FBgn0263993 | CG43736 | 3291 | -0.60 | 2.45E-04 | -0.03 | 7.64E-01  | 0.00  | 1.00E+00 |
| FBgn0032132 | CG4382  | 1610 | 1.20  | 1.55E-11 | -0.43 | 3.97E-03  | -0.64 | 3.44E-04 |
| FBgn0038771 | CG4390  | 2352 | 0.60  | 4.28E-06 | -0.01 | 9.12E-01  | -0.01 | 1.00E+00 |
| FBgn0264748 | CG44006 | 16   | -0.19 | 3.72E-01 | 0.85  | 1.86E-02  | 0.00  | 1.00E+00 |
| FBgn0264911 | CG44102 | 35   | 0.02  | 9.40E-01 | 2.66  | 5.21E-15  | 0.00  | 1.00E+00 |
| FBgn0265413 | CG44325 | 1479 | 0.60  | 1.75E-04 | -0.03 | 7.71E-01  | 0.00  | 1.00E+00 |
| FBgn0266101 | CG44838 | 1266 | -0.58 | 3.40E-05 | 0.00  | 9.80E-01  | 0.00  | 1.00E+00 |
| FBgn0031896 | CG4502  | 1190 | -0.65 | 9.37E-07 | -0.07 | 3.45E-01  | 0.00  | 1.00E+00 |
| FBgn0266410 | CG45050 | 4461 | -1.41 | 2.07E-17 | 0.01  | 9.46E-01  | 0.00  | 1.00E+00 |
| FBgn0035006 | CG4563  | 11   | -0.02 | 8.74E-01 | 0.61  | 6.06E-02  | 0.00  | 1.00E+00 |
| FBgn0037844 | CG4570  | 35   | 1.56  | 1.77E-04 | 0.00  | 9.85E-01  | 0.01  | 1.00E+00 |
| FBgn0035016 | CG4612  | 3093 | -1.01 | 2.21E-13 | -0.03 | 7.29E-01  | 0.00  | 1.00E+00 |
| FBgn0031299 | CG4629  | 51   | -0.05 | 8.82E-01 | 0.67  | 2.58E-02  | 0.00  | 1.00E+00 |
| FBgn0030776 | CG4653  | 10   | -0.02 | 8.87E-01 | -1.22 | 2.33E-02  | -0.09 | 3.33E-01 |
| FBgn0038739 | CG4686  | 1110 | 0.67  | 8.46E-09 | -0.08 | 2.57E-01  | 0.00  | 1.00E+00 |
| FBgn0037992 | CG4702  | 49   | 0.17  | 5.07E-01 | -1.32 | 4.95E-04  | -0.36 | 5.98E-02 |
| FBgn0033820 | CG4716  | 80   | 0.10  | 4.21E-01 | -2.55 | 6.25E-03  | 0.02  | 9.19E-01 |
| FBgn0030790 | CG4768  | 1064 | -0.63 | 3.80E-07 | -0.05 | 5.59E-01  | 0.00  | 1.00E+00 |
| FBgn0030792 | CG4789  | 1285 | 0.59  | 2.29E-05 | -0.02 | 8.66E-01  | 0.00  | 1.00E+00 |
| FBgn0039013 | CG4813  | 494  | 0.59  | 4.01E-05 | -0.03 | 8.17E-01  | 0.01  | 1.00E+00 |
| FBgn0037999 | CG4860  | 453  | 0.67  | 2.87E-04 | -0.04 | 7.15E-01  | 0.00  | 1.00E+00 |
| FBgn0030803 | CG4880  | 886  | -0.73 | 1.11E-10 | -0.08 | 2.48E-01  | 0.00  | 1.00E+00 |
| FBgn0035959 | CG4911  | 926  | -0.72 | 6.09E-06 | 0.00  | 9.75E-01  | 0.00  | 1.00E+00 |
| FBgn0036587 | CG4950  | 63   | -0.37 | 1.42E-01 | -0.05 | 5.76E-01  | -1.06 | 3.07E-03 |
| FBgn0036579 | CG5027  | 367  | 0.81  | 2.00E-08 | -0.02 | 8.81E-01  | -0.01 | 1.00E+00 |
| FBgn0036576 | CG5151  | 885  | -0.67 | 4.99E-04 | -0.08 | 3.45E-01  | 0.00  | 1.00E+00 |
| FBgn0038943 | CG5391  | 400  | -0.78 | 3.04E-03 | 3.62  | 7.63E-72  | 0.01  | 9.15E-01 |
| FBgn0032429 | CG5446  | 1410 | 0.62  | 1.05E-06 | 0.00  | 9.99E-01  | 0.00  | 1.00E+00 |
| FBgn0039430 | CG5455  | 141  | -0.01 | 9.85E-01 | -0.87 | 5.09E-05  | -2.03 | 7.80E-21 |
| FBgn0036760 | CG5567  | 232  | 0.60  | 1.79E-03 | 0.46  | 6.67E-04  | 0.03  | 4.91E-01 |
| FBgn0036975 | CG5618  | 404  | 0.94  | 3.40E-05 | -0.02 | 8.64E-01  | 0.00  | 1.00E+00 |
| FBgn0036254 | CG5645  | 551  | -1.20 | 2.36E-10 | 0.36  | 8.57E-03  | 0.01  | 9.37E-01 |
| FBgn0037082 | CG5664  | 538  | -0.61 | 3.00E-05 | 0.46  | 6.71E-05  | 0.01  | 1.00E+00 |
| FBgn0032171 | CG5846  | 201  | 0.69  | 1.24E-03 | 0.03  | 7.79E-01  | 0.00  | 1.00E+00 |
| FBgn0025700 | CG5885  | 3676 | 0.60  | 7.64E-10 | -0.05 | 5.96E-01  | -0.01 | 1.00E+00 |
| FBgn0038400 | CG5903  | 2203 | 0.58  | 1.78E-07 | 0.13  | 7.05E-02  | 0.00  | 1.00E+00 |
| FBgn0036997 | CG5955  | 8    | -0.23 | 1.55E-01 | 3.40  | 5.82E-05  | -0.01 | 1.00E+00 |
| FBgn0034725 | CG6044  | 626  | 0.16  | 3.62E-01 | 0.96  | 1.39E-17  | -0.01 | 1.00E+00 |
| FBgn0031918 | CG6055  | 37   | 0.14  | 5.96E-01 | -1.12 | 5.37E-03  | -0.01 | 1.00E+00 |
| FBgn0036186 | CG6071  | 137  | -0.03 | 9.16E-01 | 0.73  | 1.03E-03  | 0.83  | 7.55E-04 |
| FBgn0032453 | CG6180  | 4013 | 0.63  | 5.57E-09 | -0.03 | 8.04E-01  | 0.00  | 1.00E+00 |
| FBgn0032343 | CG6201  | 37   | -0.25 | 3.33E-01 | -0.81 | 1.07E-02  | -0.01 | 1.00E+00 |
| FBgn0038321 | CG6218  | 206  | -0.62 | 1.72E-03 | -0.04 | 6.35E-01  | -0.02 | 7.96E-01 |
| FBgn0033866 | CG6280  | 188  | -0.32 | 9.19E-02 | -0.99 | 2.70E-08  | -0.01 | 1.00E+00 |
| FBgn0037807 | CG6293  | 15   | -0.15 | 5.13E-01 | -1.83 | 4.48E-03  | -0.02 | 7.77E-01 |
| FBgn0036121 | CG6310  | 302  | 0.31  | 1.04E-01 | -0.53 | 1.07E-04  | -1.17 | 6.76E-19 |
| FBgn0039464 | CG6330  | 158  | 0.41  | 8.87E-02 | 0.88  | 6.45E-04  | -0.20 | 1.22E-01 |
| FBgn0033875 | CG6357  | 463  | -0.71 | 3.51E-04 | -1.63 | 2.20E-19  | 0.00  | 1.00E+00 |
| FBgn0029690 | CG6414  | 96   | 0.63  | 1.99E-02 | -1.28 | 1.82E-03  | 0.00  | 1.00E+00 |
| FBgn0036702 | CG6512  | 2297 | 0.13  | 2.43E-01 | 0.63  | 1.96E-19  | 0.01  | 8.51E-01 |
| FBgn0032388 | CG6686  | 1995 | -0.61 | 1.94E-05 | 0.22  | 2.61E-02  | 0.00  | 1.00E+00 |
| FBgn0032305 | CG6700  | 2874 | -0.81 | 6.27E-07 | 0.05  | 5.82E-01  | 0.00  | 1.00E+00 |
| FBgn0037915 | CG6790  | 9    | 0.18  | 2.26E-01 | 3.70  | 8.75E-06  | 0.00  | 1.00E+00 |
| FBgn0038290 | CG6912  | 99   | -5.89 | 1.77E-07 | 4.27  | 3.46E-14  | 4.50  | 3.37E-15 |
| FBgn0036240 | CG6928  | 2325 | -0.21 | 2.85E-01 | 3.92  | 1.78E-156 | 2.87  | 1.32E-82 |
| FBgn0038972 | CG7054  | 111  | -0.57 | 2.87E-02 | 2.11  | 1.30E-26  | 0.33  | 4.67E-02 |

|             |           |       |       |          |       |          |       |          |
|-------------|-----------|-------|-------|----------|-------|----------|-------|----------|
| FBgn0038941 | CG7080    | 40    | 0.15  | 4.58E-01 | 4.03  | 3.25E-20 | 0.00  | 1.00E+00 |
| FBgn0037099 | CG7173    | 192   | 0.15  | 5.00E-01 | -0.65 | 5.38E-04 | -0.52 | 8.92E-03 |
| FBgn0035861 | CG7213    | 27    | 0.29  | 2.45E-01 | 7.51  | 2.14E-09 | 0.00  | 1.00E+00 |
| FBgn0031976 | CG7367    | 156   | -0.70 | 2.69E-03 | -0.17 | 1.49E-01 | -0.02 | 7.39E-01 |
| FBgn0037135 | CG7414    | 11131 | 0.59  | 7.82E-19 | 0.01  | 9.52E-01 | 0.00  | 1.00E+00 |
| FBgn0035833 | CG7565    | 175   | -0.69 | 2.66E-03 | -2.28 | 1.43E-19 | -0.04 | 5.16E-01 |
| FBgn0040793 | CG7630    | 1562  | 1.04  | 1.98E-14 | 0.05  | 5.86E-01 | 0.00  | 1.00E+00 |
| FBgn0033548 | CG7637    | 973   | 1.92  | 5.72E-24 | 0.02  | 8.99E-01 | 0.00  | 1.00E+00 |
| FBgn0036926 | CG7646    | 134   | -1.04 | 3.22E-05 | 0.02  | 8.47E-01 | 0.00  | 1.00E+00 |
| FBgn0036929 | CG7668    | 1484  | -0.86 | 1.89E-13 | -0.02 | 8.26E-01 | -0.01 | 9.40E-01 |
| FBgn0038619 | CG7685    | 164   | 0.63  | 6.57E-03 | 0.04  | 6.43E-01 | 0.00  | 1.00E+00 |
| FBgn0036714 | CG7692    | 656   | -0.87 | 8.80E-12 | 0.04  | 6.82E-01 | 0.03  | 5.49E-01 |
| FBgn0038509 | CG7739    | 1153  | -0.64 | 3.23E-11 | -0.05 | 6.08E-01 | -0.01 | 1.00E+00 |
| FBgn0036124 | CG7839    | 1429  | -0.80 | 6.12E-07 | 0.09  | 2.63E-01 | 0.00  | 1.00E+00 |
| FBgn0037548 | CG7900    | 41    | 4.55  | 2.26E-05 | 2.11  | 6.72E-04 | 0.00  | 1.00E+00 |
| FBgn0028534 | CG7916    | 16    | 0.13  | 3.16E-01 | 0.04  | 7.30E-01 | -1.26 | 2.16E-02 |
| FBgn0039737 | CG7920    | 3784  | 0.65  | 1.36E-09 | -0.26 | 2.06E-03 | 0.00  | 1.00E+00 |
| FBgn0028533 | CG7953    | 31    | -0.07 | 5.70E-01 | -3.18 | 4.57E-04 | -0.52 | 5.46E-02 |
| FBgn0038115 | CG7966    | 139   | 0.86  | 3.03E-03 | -0.07 | 4.85E-01 | 0.01  | 1.00E+00 |
| FBgn0035260 | CG7991    | 93    | 0.16  | 5.45E-01 | -1.20 | 1.07E-04 | 0.01  | 1.00E+00 |
| FBgn0037612 | CG8112    | 68    | 0.33  | 1.87E-01 | -0.92 | 1.04E-02 | -0.03 | 7.02E-01 |
| FBgn0034010 | CG8157    | 91    | 0.13  | 5.33E-01 | -3.51 | 4.35E-08 | 0.00  | 1.00E+00 |
| FBgn0034011 | CG8160    | 19    | 0.19  | 1.39E-01 | -0.66 | 5.32E-02 | 0.00  | 1.00E+00 |
| FBgn0034030 | CG8192    | 167   | 0.76  | 5.57E-04 | -0.26 | 6.59E-02 | 0.00  | 1.00E+00 |
| FBgn0034033 | CG8204    | 166   | 0.65  | 4.51E-03 | 0.01  | 9.09E-01 | 0.00  | 1.00E+00 |
| FBgn0034143 | CG8303    | 208   | 0.46  | 3.10E-02 | 0.69  | 2.01E-04 | 0.00  | 1.00E+00 |
| FBgn0032001 | CG8360    | 132   | 0.71  | 2.84E-03 | 0.03  | 7.61E-01 | 0.00  | 1.00E+00 |
| FBgn0034067 | CG8399    | 2181  | 0.73  | 4.88E-15 | 0.00  | 9.75E-01 | 0.00  | 1.00E+00 |
| FBgn0037754 | CG8500    | 73    | -0.69 | 8.60E-03 | -1.78 | 1.52E-04 | -0.03 | 6.54E-01 |
| FBgn0035791 | CG8539    | 9     | -0.06 | 7.27E-01 | 0.83  | 2.63E-02 | 0.00  | 1.00E+00 |
| FBgn0035714 | CG8549    | 532   | -0.44 | 1.74E-02 | 0.60  | 6.84E-05 | 0.00  | 1.00E+00 |
| FBgn0036386 | CG8833    | 390   | -0.60 | 2.98E-04 | 0.03  | 8.06E-01 | 0.01  | 9.13E-01 |
| FBgn0038404 | CG8925    | 35    | -0.18 | 4.46E-01 | 0.59  | 3.32E-02 | 0.00  | 1.00E+00 |
| FBgn0038405 | CG8927    | 52    | -0.12 | 6.41E-01 | 2.02  | 1.81E-04 | 0.74  | 2.16E-02 |
| FBgn0028920 | CG8997    | 28    | -0.10 | 5.51E-01 | -5.54 | 2.35E-06 | -0.77 | 3.60E-02 |
| FBgn0040931 | CG9034    | 454   | 1.08  | 6.35E-06 | 0.05  | 5.91E-01 | 0.00  | 1.00E+00 |
| FBgn0030610 | CG9065    | 223   | 1.09  | 7.84E-06 | 0.38  | 2.24E-02 | 0.00  | 1.00E+00 |
| FBgn0030716 | CG9170    | 1167  | 0.00  | 9.77E-01 | 0.67  | 9.06E-26 | 0.01  | 9.27E-01 |
| FBgn0035181 | CG9205    | 889   | 1.09  | 7.19E-17 | 0.07  | 3.38E-01 | 0.00  | 1.00E+00 |
| FBgn0030669 | CG9240    | 519   | 0.58  | 4.27E-05 | 0.07  | 3.97E-01 | 0.00  | 1.00E+00 |
| FBgn0032925 | CG9246    | 1988  | -0.61 | 5.99E-06 | 0.06  | 4.73E-01 | 0.00  | 1.00E+00 |
| FBgn0038179 | CG9312    | 150   | 0.53  | 2.53E-02 | -0.70 | 4.84E-03 | -0.21 | 1.14E-01 |
| FBgn0032889 | CG9331    | 2348  | 0.64  | 4.33E-13 | -0.05 | 5.25E-01 | -0.07 | 1.62E-01 |
| FBgn0032897 | CG9336    | 285   | 1.72  | 2.22E-08 | -0.01 | 8.95E-01 | 0.01  | 1.00E+00 |
| FBgn0032899 | CG9338    | 208   | 1.66  | 1.58E-07 | -0.12 | 2.34E-01 | 0.00  | 1.00E+00 |
| FBgn0030569 | CG9411    | 168   | -0.21 | 4.11E-01 | 0.90  | 2.91E-04 | 0.00  | 1.00E+00 |
| FBgn0037721 | CG9427    | 1394  | 0.88  | 9.72E-07 | 0.00  | 9.73E-01 | 0.00  | 1.00E+00 |
| FBgn0037749 | CG9471    | 643   | 0.73  | 3.50E-06 | 0.10  | 2.20E-01 | 0.00  | 1.00E+00 |
| FBgn0030588 | CG9521    | 33    | -0.09 | 7.33E-01 | 1.59  | 1.95E-04 | 0.33  | 7.06E-02 |
| FBgn0031824 | CG9547    | 243   | 0.77  | 3.20E-04 | 0.04  | 7.14E-01 | 0.00  | 1.00E+00 |
| FBgn0034184 | CG9646    | 708   | -0.15 | 4.09E-01 | 0.62  | 8.27E-08 | 0.00  | 1.00E+00 |
| FBgn0029939 | CG9650    | 337   | -0.32 | 1.09E-01 | -0.61 | 9.83E-04 | 0.00  | 1.00E+00 |
| FBgn0030160 | CG9691    | 853   | 0.65  | 4.41E-04 | 0.03  | 7.54E-01 | -0.01 | 1.00E+00 |
| FBgn0039754 | CG9747    | 717   | 1.09  | 4.41E-12 | -0.51 | 1.11E-04 | -0.01 | 1.00E+00 |
| FBgn0024248 | chico     | 1054  | -0.76 | 1.68E-13 | -0.08 | 2.97E-01 | 0.01  | 1.00E+00 |
| FBgn0000307 | chif      | 2908  | -0.58 | 8.33E-04 | 0.04  | 6.23E-01 | 0.00  | 1.00E+00 |
| FBgn0086758 | chinmo    | 519   | 0.32  | 1.69E-01 | 0.72  | 1.56E-03 | 0.35  | 4.97E-02 |
| FBgn0045761 | CHKov1    | 1347  | -0.44 | 8.28E-04 | 0.59  | 8.77E-09 | 0.00  | 1.00E+00 |
| FBgn0039328 | CHKov2    | 325   | -0.17 | 4.44E-01 | 1.30  | 1.30E-01 | 0.00  | 1.00E+00 |
| FBgn0028387 | chm       | 727   | -0.61 | 1.26E-07 | -0.03 | 7.48E-01 | 0.00  | 1.00E+00 |
| FBgn0035589 | CHMP2B    | 224   | 0.81  | 1.72E-04 | 0.03  | 7.93E-01 | 0.00  | 1.00E+00 |
| FBgn0043002 | Chrac-14  | 373   | 0.65  | 1.59E-03 | 0.07  | 4.13E-01 | 0.00  | 1.00E+00 |
| FBgn0036165 | chrB      | 3380  | -0.90 | 1.39E-05 | -0.05 | 5.80E-01 | -0.01 | 1.00E+00 |
| FBgn0022702 | ChT2      | 3503  | 0.66  | 5.55E-09 | -0.06 | 4.38E-01 | -0.01 | 8.73E-01 |
| FBgn0038180 | ChT5      | 1359  | 0.60  | 1.59E-03 | 0.04  | 6.63E-01 | 0.00  | 1.00E+00 |
| FBgn0035398 | ChT7      | 1066  | 0.58  | 3.91E-03 | -0.05 | 5.99E-01 | 0.01  | 9.27E-01 |
| FBgn0004859 | ci        | 8944  | -1.01 | 3.99E-10 | -0.05 | 5.37E-01 | 0.00  | 1.00E+00 |
| FBgn0001977 | CIAPIN1   | 1526  | 0.20  | 1.04E-01 | 0.71  | 1.61E-18 | 0.00  | 1.00E+00 |
| FBgn0026084 | cib       | 15779 | -0.64 | 2.76E-06 | 0.06  | 4.84E-01 | -0.01 | 1.00E+00 |
| FBgn0015024 | Ckl1alpha | 6805  | -1.20 | 3.97E-18 | -0.03 | 7.82E-01 | 0.00  | 1.00E+00 |
| FBgn0000259 | Ckl1beta  | 4366  | -0.71 | 2.16E-16 | 0.01  | 9.62E-01 | 0.00  | 1.00E+00 |
| FBgn0000318 | cl        | 1966  | 1.07  | 9.57E-13 | 0.11  | 1.85E-01 | -0.01 | 1.00E+00 |
| FBgn0052251 | Claspin   | 1098  | -0.97 | 1.62E-05 | 0.02  | 8.37E-01 | 0.00  | 1.00E+00 |
| FBgn0259152 | Clbn      | 1163  | -0.65 | 2.13E-07 | 0.52  | 2.71E-08 | 0.00  | 1.00E+00 |
| FBgn0020503 | CLIP-190  | 1351  | -0.94 | 5.34E-09 | 0.01  | 9.54E-01 | 0.00  | 1.00E+00 |
| FBgn0035767 | Cln7      | 1086  | 0.63  | 1.01E-04 | -0.09 | 2.90E-01 | 0.00  | 1.00E+00 |
| FBgn0026255 | clumsy    | 768   | -0.05 | 8.43E-01 | 1.88  | 6.29E-37 | 0.10  | 1.79E-01 |
| FBgn0034802 | CNBP      | 42330 | -0.99 | 2.65E-17 | 0.03  | 7.85E-01 | 0.00  | 1.00E+00 |
| FBgn0264077 | Cnx14D    | 13    | 0.08  | 7.33E-01 | 6.73  | 7.83E-07 | 0.00  | 1.00E+00 |

|             |               |       |       |          |       |           |       |           |
|-------------|---------------|-------|-------|----------|-------|-----------|-------|-----------|
| FBgn0010105 | comm          | 299   | 0.84  | 5.61E-06 | -0.03 | 7.35E-01  | 0.00  | 1.00E+00  |
| FBgn0039994 | conu          | 1969  | -0.92 | 1.92E-15 | 0.03  | 7.39E-01  | 0.00  | 1.00E+00  |
| FBgn0033192 | Corin         | 24    | -0.10 | 7.04E-01 | -1.49 | 7.09E-03  | 0.00  | 1.00E+00  |
| FBgn0030028 | Corp          | 23    | 0.18  | 4.74E-01 | 0.74  | 1.54E-02  | -0.01 | 1.00E+00  |
| FBgn0032833 | COX4          | 2941  | 0.86  | 5.76E-08 | 0.12  | 1.56E-01  | 0.00  | 1.00E+00  |
| FBgn0019624 | COX5A         | 2606  | 1.17  | 1.83E-09 | 0.05  | 5.56E-01  | 0.00  | 1.00E+00  |
| FBgn0031830 | COX5B         | 1591  | 0.59  | 1.91E-06 | 0.00  | 9.88E-01  | -0.02 | 7.52E-01  |
| FBgn0031066 | COX6B         | 2997  | 0.78  | 3.12E-11 | -0.06 | 5.05E-01  | -0.01 | 1.00E+00  |
| FBgn0040529 | COX7A         | 3160  | 1.11  | 4.94E-14 | -0.01 | 9.48E-01  | 0.00  | 1.00E+00  |
| FBgn0263911 | COX8          | 1195  | 0.59  | 1.97E-04 | 0.02  | 8.62E-01  | 0.00  | 1.00E+00  |
| FBgn0053302 | Cpr31A        | 46    | 1.71  | 3.35E-06 | 0.02  | 8.71E-01  | 0.00  | 1.00E+00  |
| FBgn0028871 | Cpr35B        | 60    | 1.28  | 2.13E-04 | 0.00  | 9.89E-01  | -0.01 | 1.00E+00  |
| FBgn0033598 | Cpr47Eb       | 67    | 1.16  | 1.59E-03 | 0.05  | 6.06E-01  | 0.00  | 1.00E+00  |
| FBgn0033602 | Cpr47Ee       | 24    | -0.03 | 8.88E-01 | -1.69 | 4.84E-03  | 0.00  | 1.00E+00  |
| FBgn0033730 | Cpr49Ag       | 381   | 0.92  | 1.89E-07 | -0.07 | 3.83E-01  | 0.00  | 1.00E+00  |
| FBgn0033731 | Cpr49Ah       | 539   | 0.81  | 1.36E-03 | 1.02  | 1.13E-04  | 0.16  | 1.61E-01  |
| FBgn0033942 | Cpr51A        | 266   | 0.96  | 8.10E-05 | -0.51 | 9.48E-03  | 0.00  | 1.00E+00  |
| FBgn0034499 | Cpr56F        | 33    | -0.17 | 4.91E-01 | -2.07 | 2.64E-04  | -0.01 | 1.00E+00  |
| FBgn0035737 | Cpr65Ec       | 171   | 0.83  | 1.01E-03 | -0.33 | 4.57E-02  | -0.21 | 1.14E-01  |
| FBgn0052029 | Cpr66D        | 478   | 1.87  | 5.31E-25 | -0.03 | 8.00E-01  | 0.00  | 1.00E+00  |
| FBgn0036109 | Cpr67Fa2      | 86    | 0.27  | 2.67E-01 | -0.09 | 3.18E-01  | -0.66 | 5.64E-03  |
| FBgn0036617 | Cpr72Ea       | 13    | 0.83  | 6.43E-03 | 0.03  | 7.54E-01  | 0.00  | 1.00E+00  |
| FBgn0037114 | Cpr78E        | 355   | 0.71  | 9.83E-03 | -0.59 | 2.57E-02  | -0.02 | 8.40E-01  |
| FBgn0042701 | CR12628       | 15    | 0.32  | 1.58E-01 | 1.70  | 3.97E-03  | 0.03  | 7.10E-01  |
| FBgn0040928 | CR15345       | 118   | -0.66 | 4.31E-03 | 0.00  | 9.77E-01  | 0.00  | 1.00E+00  |
| FBgn0262532 | CR43086       | 36    | 0.01  | 9.46E-01 | 5.51  | 5.98E-22  | 3.08  | 3.23E-06  |
| FBgn0263093 | CR43361       | 426   | -0.03 | 8.89E-01 | -1.74 | 1.53E-30  | 0.00  | 1.00E+00  |
| FBgn0263744 | CR43669       | 21    | -0.86 | 5.34E-03 | 0.04  | 7.25E-01  | 0.00  | 1.00E+00  |
| FBgn0035636 | Cralbp        | 80    | 0.73  | 3.28E-03 | -0.10 | 3.25E-01  | 0.00  | 1.00E+00  |
| FBgn0004396 | CrebA         | 1973  | -0.77 | 1.03E-05 | 0.00  | 9.83E-01  | 0.00  | 1.00E+00  |
| FBgn0023023 | CRMP          | 259   | -0.13 | 5.66E-01 | -1.04 | 7.11E-10  | 0.00  | 1.00E+00  |
| FBgn0015924 | crq           | 883   | -0.78 | 1.85E-12 | -0.06 | 4.91E-01  | 0.00  | 1.00E+00  |
| FBgn0036746 | Crtc          | 1137  | -0.88 | 5.35E-06 | 0.04  | 7.12E-01  | 0.00  | 1.00E+00  |
| FBgn0000384 | cta           | 945   | -0.64 | 6.04E-04 | 0.02  | 8.88E-01  | 0.00  | 1.00E+00  |
| FBgn0062412 | Ctr1B         | 34    | 0.02  | 8.78E-01 | -0.82 | 3.92E-02  | -0.07 | 4.03E-01  |
| FBgn0260932 | cuff          | 181   | -0.59 | 9.91E-04 | 0.34  | 1.92E-02  | 0.00  | 1.00E+00  |
| FBgn0032956 | Cul2          | 6827  | -0.48 | 5.97E-05 | 3.49  | 0.00E+00  | 0.01  | 1.00E+00  |
| FBgn0261268 | Cul3          | 3133  | -0.62 | 1.96E-10 | -0.02 | 9.07E-01  | 0.00  | 1.00E+00  |
| FBgn0035880 | Culd          | 2104  | -0.15 | 5.49E-01 | 3.94  | 7.19E-150 | 5.04  | 1.82E-247 |
| FBgn0031689 | Cyp28d1       | 91    | 1.86  | 1.03E-03 | -0.16 | 2.56E-01  | 0.00  | 1.00E+00  |
| FBgn0001992 | Cyp303a1      | 68    | -0.99 | 1.46E-03 | 0.02  | 8.88E-01  | 0.02  | 9.40E-01  |
| FBgn0034756 | Cyp6d2        | 381   | 0.01  | 9.79E-01 | 4.75  | 2.83E-216 | 0.02  | 7.02E-01  |
| FBgn0039006 | Cyp6d4        | 137   | 0.36  | 1.38E-01 | 1.42  | 6.67E-10  | 0.00  | 1.00E+00  |
| FBgn0025454 | Cyp6g1        | 147   | 0.24  | 3.07E-01 | -1.83 | 1.59E-04  | -0.01 | 1.00E+00  |
| FBgn0031126 | Cyp6v1        | 1037  | -1.19 | 1.46E-27 | -0.18 | 5.37E-03  | 0.00  | 1.00E+00  |
| FBgn0000411 | D             | 14    | 0.19  | 2.73E-01 | -0.62 | 4.04E-02  | 0.01  | 1.00E+00  |
| FBgn0005677 | dac           | 806   | -0.13 | 4.87E-01 | -0.95 | 7.73E-13  | 0.03  | 5.06E-01  |
| FBgn0263852 | Dad1          | 1589  | 1.13  | 4.02E-14 | 0.00  | 9.86E-01  | -0.01 | 1.00E+00  |
| FBgn0263930 | dally         | 6391  | -0.67 | 2.37E-07 | 0.06  | 4.68E-01  | 0.00  | 1.00E+00  |
| FBgn0262636 | datl          | 43    | -0.07 | 7.98E-01 | 3.80  | 3.07E-10  | 5.11  | 4.48E-18  |
| FBgn0031820 | Daxx          | 2065  | -0.59 | 3.50E-06 | -0.02 | 8.83E-01  | 0.01  | 1.00E+00  |
| FBgn0067779 | dbr           | 1696  | -0.84 | 1.08E-11 | 0.01  | 9.73E-01  | 0.00  | 1.00E+00  |
| FBgn0002413 | dco           | 3330  | -0.72 | 1.41E-14 | -0.01 | 9.24E-01  | 0.00  | 1.00E+00  |
| FBgn0036534 | DCCP2         | 6445  | -0.99 | 5.36E-08 | 0.03  | 7.18E-01  | 0.00  | 1.00E+00  |
| FBgn0029067 | Dd            | 965   | -0.87 | 1.81E-10 | -0.02 | 8.60E-01  | 0.00  | 1.00E+00  |
| FBgn0086251 | del           | 642   | -0.93 | 2.75E-08 | -0.05 | 5.91E-01  | 0.00  | 1.00E+00  |
| FBgn0267972 | Der-1         | 1024  | 0.64  | 1.65E-07 | 0.03  | 7.60E-01  | 0.00  | 1.00E+00  |
| FBgn0022893 | Df31          | 48354 | -0.63 | 6.61E-10 | 0.02  | 8.64E-01  | 0.00  | 1.00E+00  |
| FBgn0013812 | Dhc93AB       | 47    | -0.10 | 7.32E-01 | 0.83  | 4.04E-03  | 0.00  | 1.00E+00  |
| FBgn0000449 | dib           | 86    | -0.60 | 1.66E-02 | -1.67 | 3.76E-06  | -0.04 | 5.19E-01  |
| FBgn0011274 | Dif           | 323   | -0.45 | 3.54E-02 | 2.57  | 3.24E-38  | 0.00  | 1.00E+00  |
| FBgn0000459 | disco         | 168   | -0.02 | 9.57E-01 | -0.73 | 2.21E-03  | 0.02  | 8.78E-01  |
| FBgn0285879 | disco-r       | 318   | 0.11  | 6.79E-01 | -1.45 | 2.90E-11  | 0.04  | 4.80E-01  |
| FBgn0263106 | DnaJ-1        | 4644  | -0.23 | 5.57E-01 | -0.72 | 2.47E-05  | 0.00  | 1.00E+00  |
| FBgn0286075 | DNAIlg3       | 384   | 0.13  | 1.73E-01 | 0.73  | 5.92E-14  | 0.00  | 1.00E+00  |
| FBgn0030506 | DNAIlg4       | 262   | -0.19 | 3.68E-01 | 0.74  | 2.66E-08  | 0.00  | 1.00E+00  |
| FBgn0002891 | DNApol-zeta   | 1022  | -0.31 | 3.75E-02 | 0.88  | 1.75E-15  | 0.02  | 6.30E-01  |
| FBgn0035542 | DOR           | 485   | -0.62 | 6.59E-03 | 0.00  | 9.77E-01  | 0.00  | 1.00E+00  |
| FBgn0024558 | Dph5          | 1749  | 0.65  | 2.00E-07 | 0.09  | 2.15E-01  | 0.00  | 1.00E+00  |
| FBgn0037295 | dpr16         | 116   | 2.16  | 3.85E-14 | 0.00  | 9.71E-01  | -0.01 | 9.39E-01  |
| FBgn0053196 | dpy           | 6720  | 1.12  | 5.51E-07 | 0.63  | 1.77E-03  | 0.01  | 1.00E+00  |
| FBgn0032293 | Dpy-30L1      | 556   | 0.88  | 3.89E-06 | -0.01 | 9.49E-01  | 0.00  | 1.00E+00  |
| FBgn0260006 | drd           | 87    | 0.15  | 5.72E-01 | 1.73  | 4.49E-05  | 0.01  | 1.00E+00  |
| FBgn0004638 | drk           | 3220  | -0.61 | 7.50E-08 | -0.02 | 8.51E-01  | 0.00  | 1.00E+00  |
| FBgn0024244 | drrm          | 2325  | -0.71 | 1.13E-07 | -0.15 | 8.06E-02  | -0.01 | 1.00E+00  |
| FBgn0278608 | Dsp1          | 6983  | -0.58 | 7.34E-05 | 0.00  | 9.82E-01  | 0.00  | 1.00E+00  |
| FBgn0261799 | dsx-c73A      | 101   | 1.06  | 6.38E-06 | 0.37  | 2.38E-02  | 0.00  | 1.00E+00  |
| FBgn0027101 | DyrK3         | 2604  | -0.88 | 1.38E-09 | -0.03 | 7.75E-01  | 0.00  | 1.00E+00  |
| FBgn0002592 | E(sp)jml2-BFM | 1109  | 0.65  | 6.60E-06 | -0.12 | 1.52E-01  | 0.00  | 1.00E+00  |



|             |                  |       |       |          |       |           |       |          |
|-------------|------------------|-------|-------|----------|-------|-----------|-------|----------|
| FBgn0002629 | E(spl)m4-BFM     | 800   | 0.72  | 3.01E-07 | 0.05  | 5.64E-01  | 0.09  | 1.63E-01 |
| FBgn0002732 | E(spl)malpha-BFM | 2631  | 0.76  | 1.39E-05 | -0.01 | 9.10E-01  | 0.00  | 1.00E+00 |
| FBgn0002735 | E(spl)mgamma-HLH | 148   | 0.65  | 4.39E-03 | 0.05  | 9.80E-01  | 0.01  | 8.87E-01 |
| FBgn0011766 | E2f1             | 4380  | -0.84 | 3.21E-10 | 0.01  | 9.30E-01  | 0.01  | 1.00E+00 |
| FBgn0069242 | eca              | 731   | 0.68  | 1.04E-03 | 0.00  | 9.98E-01  | -0.01 | 1.00E+00 |
| FBgn0033879 | Echs1            | 3518  | 0.92  | 3.48E-26 | -0.02 | 8.64E-01  | 0.00  | 1.00E+00 |
| FBgn0260746 | Ect3             | 339   | -1.92 | 2.07E-19 | 0.04  | 7.15E-01  | -0.01 | 1.00E+00 |
| FBgn0028737 | eEF1beta         | 17684 | 0.95  | 5.64E-23 | -0.07 | 3.37E-01  | 0.00  | 1.00E+00 |
| FBgn0029176 | eEF1gamma        | 47067 | 0.69  | 1.56E-30 | -0.04 | 6.50E-01  | 0.00  | 1.00E+00 |
| FBgn0034883 | Egfp2            | 10    | 0.03  | 8.59E-01 | 1.95  | 2.90E-03  | 0.19  | 1.44E-01 |
| FBgn0037270 | eIF3f1           | 6584  | 0.80  | 1.53E-14 | -0.04 | 7.25E-01  | 0.00  | 1.00E+00 |
| FBgn0022023 | eIF3h            | 7150  | 0.90  | 6.93E-21 | 0.00  | 9.80E-01  | 0.00  | 1.00E+00 |
| FBgn0020660 | eIF4B            | 389   | -0.77 | 7.87E-03 | -0.12 | 2.19E-01  | -0.07 | 3.37E-01 |
| FBgn0053100 | eIF4EHP          | 1127  | -1.07 | 3.14E-18 | 0.03  | 7.43E-01  | 0.00  | 1.00E+00 |
| FBgn0023213 | eIF4G1           | 11399 | -0.77 | 1.42E-10 | -0.03 | 7.86E-01  | 0.00  | 1.00E+00 |
| FBgn0262734 | eIF4H1           | 7393  | -1.47 | 7.70E-14 | 0.01  | 9.18E-01  | 0.00  | 1.00E+00 |
| FBgn0030719 | eIF5             | 87    | -2.37 | 1.38E-05 | 0.03  | 7.39E-01  | 0.00  | 1.00E+00 |
| FBgn0034915 | eIF6             | 2129  | 0.36  | 8.36E-03 | 0.83  | 2.03E-15  | 0.00  | 1.00E+00 |
| FBgn0004858 | eIb              | 1567  | -0.77 | 1.52E-09 | 0.04  | 6.25E-01  | 0.00  | 1.00E+00 |
| FBgn0037534 | ELOVL            | 41    | 0.60  | 2.45E-02 | -0.09 | 4.12E-01  | 0.00  | 1.00E+00 |
| FBgn0062440 | EMRE             | 456   | 0.87  | 1.66E-05 | 0.01  | 9.36E-01  | 0.00  | 1.00E+00 |
| FBgn0000579 | Eno              | 10736 | 0.65  | 1.05E-11 | -0.03 | 7.79E-01  | -0.01 | 1.00E+00 |
| FBgn0264693 | ens              | 3968  | -0.63 | 2.15E-06 | 0.01  | 9.18E-01  | 0.00  | 1.00E+00 |
| FBgn0036319 | Ent3             | 19    | -0.14 | 4.83E-01 | -0.83 | 1.87E-02  | -0.01 | 1.00E+00 |
| FBgn0025936 | Eph              | 4729  | -0.81 | 1.92E-08 | -0.07 | 4.30E-01  | 0.00  | 1.00E+00 |
| FBgn0040324 | Ephrin           | 2393  | -0.62 | 2.73E-03 | -0.01 | 9.53E-01  | 0.00  | 1.00E+00 |
| FBgn0005660 | Ets21C           | 87    | 0.15  | 5.10E-01 | 2.51  | 3.68E-04  | 0.00  | 1.00E+00 |
| FBgn0033668 | exp              | 166   | -0.65 | 1.72E-03 | -0.06 | 4.78E-01  | 0.00  | 1.00E+00 |
| FBgn0034529 | FAM21            | 494   | -0.58 | 1.42E-05 | 0.02  | 8.90E-01  | 0.01  | 1.00E+00 |
| FBgn0032428 | Fam92            | 20    | 0.07  | 7.33E-01 | 3.79  | 5.35E-11  | 0.00  | 1.00E+00 |
| FBgn0042627 | FASN2            | 15    | 0.06  | 6.87E-01 | 0.67  | 4.83E-02  | 0.10  | 2.91E-01 |
| FBgn0034999 | Fatp3            | 93    | 0.25  | 3.03E-01 | -1.49 | 1.09E-03  | -0.09 | 3.00E-01 |
| FBgn0014163 | fax              | 30703 | -0.92 | 3.44E-16 | -0.10 | 1.77E-01  | 0.00  | 1.00E+00 |
| FBgn0000639 | Fbp1             | 20462 | 0.58  | 1.65E-02 | -0.05 | 6.80E-01  | 0.00  | 1.00E+00 |
| FBgn0004897 | fd96Ca           | 39    | 0.18  | 2.26E-01 | -2.52 | 9.80E-08  | 0.00  | 1.00E+00 |
| FBgn0004898 | fd96Cb           | 154   | 1.83  | 1.09E-03 | -1.96 | 8.37E-05  | 0.01  | 1.00E+00 |
| FBgn0011768 | Fdh              | 3119  | 1.45  | 1.89E-32 | 0.12  | 9.98E-02  | 0.02  | 6.08E-01 |
| FBgn0015221 | Fer2LCH          | 4994  | 0.62  | 1.05E-16 | 0.11  | 6.21E-02  | 0.00  | 1.00E+00 |
| FBgn0039969 | Fis1             | 1106  | -0.59 | 9.95E-05 | -0.02 | 8.95E-01  | 0.00  | 1.00E+00 |
| FBgn0000658 | fj               | 5209  | -0.81 | 3.71E-11 | 0.11  | 9.65E-02  | 0.00  | 1.00E+00 |
| FBgn0013954 | Fkbp12           | 9074  | 1.03  | 6.70E-36 | 0.08  | 2.51E-01  | 0.00  | 1.00E+00 |
| FBgn0033806 | FLASH            | 452   | -0.84 | 2.02E-07 | 0.04  | 6.52E-01  | 0.00  | 1.00E+00 |
| FBgn0028734 | Fmr1             | 5727  | -0.78 | 5.68E-09 | 0.05  | 5.79E-01  | 0.00  | 1.00E+00 |
| FBgn0286222 | Fum1             | 4193  | 0.72  | 1.52E-10 | -0.04 | 7.12E-01  | 0.00  | 1.00E+00 |
| FBgn0039932 | fuss             | 37    | -0.01 | 9.66E-01 | 2.22  | 1.05E-05  | 0.00  | 1.00E+00 |
| FBgn0001085 | fz               | 2807  | -0.62 | 1.53E-06 | -0.08 | 3.18E-01  | 0.00  | 1.00E+00 |
| FBgn0031275 | GABA-B-R3        | 12    | 0.31  | 1.46E-01 | 3.04  | 4.22E-05  | 0.00  | 1.00E+00 |
| FBgn0033153 | Gadd45           | 924   | -0.03 | 8.97E-01 | 1.85  | 2.07E-41  | 0.00  | 1.00E+00 |
| FBgn0001122 | Galphao          | 883   | -0.93 | 4.45E-10 | -0.02 | 8.19E-01  | 0.00  | 1.00E+00 |
| FBgn0004435 | Galphaq          | 656   | -1.67 | 8.33E-15 | 0.00  | 9.86E-01  | 0.00  | 1.00E+00 |
| FBgn0001123 | Galphas          | 2681  | -0.69 | 1.58E-16 | -0.03 | 8.08E-01  | 0.00  | 1.00E+00 |
| FBgn0001091 | Gapdh1           | 5452  | 0.68  | 3.17E-08 | 0.03  | 7.91E-01  | 0.00  | 1.00E+00 |
| FBgn0001092 | Gapdh2           | 16172 | 0.72  | 1.33E-21 | 0.08  | 2.03E-01  | 0.00  | 1.00E+00 |
| FBgn0032223 | GATAd            | 1049  | -0.75 | 4.92E-07 | -0.05 | 6.16E-01  | 0.00  | 1.00E+00 |
| FBgn0001105 | Gbeta13F         | 6116  | -1.18 | 2.14E-13 | -0.02 | 8.45E-01  | 0.00  | 1.00E+00 |
| FBgn0040319 | Gclc             | 466   | -0.10 | 6.52E-01 | 0.86  | 6.23E-10  | 0.00  | 1.00E+00 |
| FBgn0020388 | Gcn5             | 1584  | 0.01  | 9.38E-01 | 1.05  | 8.06E-33  | 0.01  | 1.00E+00 |
| FBgn0000808 | gd               | 21    | 0.13  | 5.32E-01 | 3.47  | 7.24E-13  | 0.00  | 1.00E+00 |
| FBgn0033081 | geminin          | 1895  | 0.66  | 1.64E-06 | -0.02 | 9.04E-01  | 0.00  | 1.00E+00 |
| FBgn0250823 | gish             | 4407  | -0.94 | 4.34E-13 | 0.03  | 7.82E-01  | 0.00  | 1.00E+00 |
| FBgn0015229 | glec             | 1116  | -0.61 | 3.40E-05 | 0.02  | 8.88E-01  | -0.01 | 1.00E+00 |
| FBgn0004913 | Gnfr1            | 1884  | -0.64 | 1.25E-06 | -0.01 | 9.54E-01  | 0.01  | 1.00E+00 |
| FBgn0263048 | Gpdh3            | 671   | -0.71 | 1.65E-07 | 0.05  | 5.72E-01  | 0.01  | 1.00E+00 |
| FBgn0260798 | Gprk1            | 1444  | -0.93 | 2.42E-16 | -0.06 | 4.44E-01  | 0.00  | 1.00E+00 |
| FBgn0035167 | Gr61a            | 111   | 0.64  | 1.02E-02 | 1.25  | 3.97E-08  | 0.00  | 1.00E+00 |
| FBgn0039494 | grass            | 168   | 0.95  | 6.23E-04 | -0.03 | 7.66E-01  | 0.00  | 1.00E+00 |
| FBgn0001137 | grk              | 60    | -1.88 | 3.50E-06 | 0.01  | 9.09E-01  | -0.01 | 1.00E+00 |
| FBgn0019982 | Gs1l             | 293   | 0.61  | 5.31E-03 | 0.00  | 9.95E-01  | 0.00  | 1.00E+00 |
| FBgn0001148 | gsb              | 14    | 0.09  | 6.04E-01 | -1.84 | 2.89E-03  | 0.00  | 1.00E+00 |
| FBgn0001147 | gsb-n            | 13    | 0.07  | 6.91E-01 | -1.55 | 4.35E-03  | 0.00  | 1.00E+00 |
| FBgn0001149 | GstD1            | 10655 | 1.18  | 7.26E-22 | 0.08  | 3.21E-01  | -0.01 | 1.00E+00 |
| FBgn0010039 | GstD3            | 959   | -1.17 | 1.90E-10 | 0.63  | 3.50E-07  | 0.00  | 1.00E+00 |
| FBgn0038020 | GstD9            | 723   | -0.53 | 5.19E-03 | 0.89  | 3.62E-10  | 0.02  | 7.52E-01 |
| FBgn0034335 | GstE1            | 1270  | 0.50  | 2.32E-02 | 5.48  | 0.00E+00  | 0.62  | 1.95E-05 |
| FBgn0027590 | GstE12           | 2243  | 0.80  | 1.39E-08 | 0.06  | 5.13E-01  | 0.00  | 1.00E+00 |
| FBgn0063498 | GstE2            | 76    | 0.03  | 8.52E-01 | 6.89  | 9.09E-39  | 0.00  | 1.00E+00 |
| FBgn0063495 | GstE5            | 41    | 0.36  | 1.44E-01 | 1.34  | 9.60E-05  | -0.01 | 1.00E+00 |
| FBgn0063494 | GstE6            | 374   | 0.19  | 4.42E-01 | 4.52  | 2.60E-102 | 0.80  | 1.67E-03 |
| FBgn0063492 | GstE8            | 106   | 0.14  | 5.85E-01 | 1.66  | 7.07E-11  | 0.63  | 1.24E-02 |

|             |               |        |       |          |       |          |       |          |
|-------------|---------------|--------|-------|----------|-------|----------|-------|----------|
| FBgn0050000 | GstT1         | 515    | -0.02 | 9.28E-01 | 1.05  | 3.81E-19 | 0.00  | 1.00E+00 |
| FBgn0031117 | GstT3         | 109    | 0.98  | 3.51E-04 | 0.02  | 8.80E-01 | -0.03 | 6.08E-01 |
| FBgn0026238 | gus           | 2692   | -0.99 | 3.39E-18 | -0.01 | 9.44E-01 | 0.00  | 1.00E+00 |
| FBgn0039936 | Gyf           | 5384   | -0.60 | 9.10E-09 | -0.05 | 5.59E-01 | 0.00  | 1.00E+00 |
| FBgn0016660 | H15           | 67     | 0.29  | 1.75E-01 | -1.81 | 1.80E-04 | 0.01  | 1.00E+00 |
| FBgn0032394 | Hacd1         | 670    | 0.71  | 1.68E-07 | -0.22 | 1.37E-02 | 0.00  | 1.00E+00 |
| FBgn0034488 | Hacl          | 2789   | 0.59  | 1.23E-11 | -0.03 | 7.67E-01 | 0.00  | 1.00E+00 |
| FBgn0286508 | Had1          | 310    | 0.66  | 8.55E-03 | -0.01 | 9.16E-01 | 0.01  | 1.00E+00 |
| FBgn0033949 | Had2          | 63     | 0.21  | 4.30E-01 | -0.31 | 7.20E-02 | -0.59 | 2.15E-02 |
| FBgn0046706 | Haspin        | 1098   | -1.00 | 3.56E-13 | 0.01  | 9.18E-01 | -0.01 | 9.13E-01 |
| FBgn0051119 | HDAC11        | 108    | -0.87 | 4.32E-04 | 0.13  | 3.37E-01 | -0.01 | 1.00E+00 |
| FBgn0011224 | heph          | 19761  | -0.80 | 6.76E-07 | -0.01 | 9.33E-01 | 0.00  | 1.00E+00 |
| FBgn0001185 | her           | 823    | -0.85 | 6.24E-10 | 0.00  | 9.90E-01 | 0.00  | 1.00E+00 |
| FBgn0031459 | HINT1         | 2526   | 1.22  | 1.99E-18 | 0.04  | 6.85E-01 | 0.00  | 1.00E+00 |
| FBgn0029676 | HIP-R         | 1449   | -1.00 | 1.27E-11 | 0.02  | 8.36E-01 | -0.01 | 1.00E+00 |
| FBgn0010228 | HmgZ          | 5046   | -1.13 | 3.34E-40 | -0.06 | 4.70E-01 | 0.00  | 1.00E+00 |
| FBgn0035160 | hng3          | 952    | 0.83  | 6.58E-08 | 0.03  | 7.51E-01 | -0.02 | 7.72E-01 |
| FBgn0286786 | holp          | 2078   | 0.67  | 3.30E-05 | 0.06  | 4.66E-01 | 0.00  | 1.00E+00 |
| FBgn0025777 | homer         | 1227   | -0.59 | 2.79E-06 | -0.01 | 9.45E-01 | 0.00  | 1.00E+00 |
| FBgn0039019 | HP1c          | 924    | 0.74  | 1.49E-08 | 0.02  | 8.82E-01 | -0.01 | 1.00E+00 |
| FBgn0035829 | HP4           | 943    | 0.86  | 1.33E-08 | -0.01 | 9.47E-01 | 0.00  | 1.00E+00 |
| FBgn0036992 | Hpd           | 47     | -0.06 | 8.29E-01 | 1.06  | 2.78E-02 | 0.00  | 1.00E+00 |
| FBgn0062928 | hpRNA:CR33940 | 1575   | 0.04  | 8.63E-01 | 0.08  | 3.50E-01 | -0.63 | 6.35E-05 |
| FBgn0261239 | Hr39          | 2570   | -0.62 | 2.60E-04 | 0.03  | 7.29E-01 | 0.00  | 1.00E+00 |
| FBgn0040438 | Hrb27C        | 27370  | -0.74 | 5.65E-06 | 0.00  | 9.93E-01 | 0.00  | 1.00E+00 |
| FBgn0015949 | hrg           | 4460   | -0.65 | 6.58E-08 | -0.01 | 9.30E-01 | 0.00  | 1.00E+00 |
| FBgn0001217 | Hsc70-2       | 69     | 6.71  | 3.42E-10 | -0.17 | 2.55E-01 | -0.01 | 1.00E+00 |
| FBgn0266599 | Hsc70-4       | 117280 | 0.62  | 2.13E-13 | -0.02 | 8.37E-01 | -0.01 | 1.00E+00 |
| FBgn0001225 | Hsp26         | 9822   | 1.22  | 1.08E-09 | -0.76 | 2.25E-05 | -0.01 | 9.36E-01 |
| FBgn0015245 | Hsp60A        | 10641  | 0.72  | 1.47E-15 | 0.03  | 7.32E-01 | 0.00  | 1.00E+00 |
| FBgn0001229 | Hsp67Bc       | 154    | 0.75  | 5.60E-03 | -0.25 | 1.02E-01 | 1.19  | 2.82E-04 |
| FBgn0001230 | Hsp68         | 4283   | 2.04  | 3.72E-05 | -0.23 | 1.53E-01 | 0.00  | 1.00E+00 |
| FBgn0013276 | Hsp70Ab       | 244    | 1.56  | 5.11E-05 | -0.04 | 6.54E-01 | 0.00  | 1.00E+00 |
| FBgn0013278 | Hsp70Bb       | 477    | 3.65  | 6.59E-06 | -0.04 | 6.85E-01 | 0.00  | 1.00E+00 |
| FBgn0013279 | Hsp70Bc       | 336    | 0.14  | 5.78E-01 | -0.60 | 2.76E-02 | 0.00  | 1.00E+00 |
| FBgn0061198 | HSPC300       | 346    | 0.67  | 1.15E-03 | 0.03  | 7.98E-01 | 0.00  | 1.00E+00 |
| FBgn0001235 | hth           | 8836   | -1.34 | 8.95E-12 | -0.03 | 7.37E-01 | 0.00  | 1.00E+00 |
| FBgn0010389 | hitl          | 655    | -0.47 | 5.38E-04 | -0.68 | 7.42E-11 | -0.03 | 5.57E-01 |
| FBgn0033968 | hui           | 830    | 1.30  | 1.52E-31 | -0.25 | 1.07E-03 | -0.40 | 2.25E-06 |
| FBgn0038556 | hzig          | 1250   | -0.84 | 3.30E-07 | -0.04 | 6.88E-01 | 0.00  | 1.00E+00 |
| FBgn0286204 | ich           | 15     | -0.15 | 4.49E-01 | 0.76  | 3.76E-02 | 0.82  | 3.10E-02 |
| FBgn0001248 | ldh           | 11385  | 0.64  | 1.66E-18 | -0.41 | 1.55E-11 | -0.79 | 3.46E-41 |
| FBgn0038690 | llp8          | 61     | 0.10  | 4.72E-01 | 7.14  | 7.50E-17 | 0.00  | 1.00E+00 |
| FBgn0285926 | lmp           | 2083   | -0.92 | 7.76E-06 | 0.01  | 9.32E-01 | 0.00  | 1.00E+00 |
| FBgn0001255 | lmpE3         | 1673   | 0.60  | 8.75E-03 | -0.03 | 8.00E-01 | -0.01 | 1.00E+00 |
| FBgn0001256 | lmpL1         | 53     | 0.18  | 4.69E-01 | -2.17 | 5.55E-05 | -0.01 | 1.00E+00 |
| FBgn0001263 | inaD          | 152    | -1.09 | 6.41E-06 | -0.33 | 1.27E-01 | -0.05 | 5.16E-01 |
| FBgn0039459 | IntS12        | 266    | 0.59  | 4.56E-03 | 0.12  | 1.91E-01 | 0.84  | 3.22E-06 |
| FBgn0262117 | IntS3         | 2249   | -0.72 | 5.69E-13 | -0.03 | 8.06E-01 | 0.00  | 1.00E+00 |
| FBgn0027106 | inx7          | 34     | 1.67  | 7.61E-05 | 0.00  | 9.88E-01 | -0.01 | 1.00E+00 |
| FBgn0259683 | ir40a         | 56     | 0.12  | 4.36E-01 | 5.29  | 3.59E-25 | 0.01  | 1.00E+00 |
| FBgn0050081 | ir51b         | 36     | -0.63 | 1.99E-02 | 0.00  | 9.89E-01 | 0.00  | 1.00E+00 |
| FBgn0011774 | irbp          | 458    | -0.04 | 8.60E-01 | 1.22  | 2.35E-45 | 0.02  | 6.08E-01 |
| FBgn0036126 | irbp18        | 342    | -0.22 | 2.45E-01 | 1.38  | 2.54E-33 | 0.00  | 1.00E+00 |
| FBgn0037637 | iscU          | 1069   | -0.24 | 1.13E-01 | 1.08  | 5.20E-30 | 0.00  | 1.00E+00 |
| FBgn0034005 | ItgaPS4       | 26     | 0.83  | 6.27E-03 | 0.28  | 1.34E-01 | 0.00  | 1.00E+00 |
| FBgn0010053 | Jheh1         | 254    | 0.43  | 2.53E-02 | -0.67 | 4.97E-05 | 0.00  | 1.00E+00 |
| FBgn0028424 | Jhl-26        | 62     | -0.06 | 8.21E-01 | 1.56  | 1.78E-03 | 0.00  | 1.00E+00 |
| FBgn0020906 | Jon25Bi       | 21     | -0.13 | 2.46E-01 | -2.69 | 6.00E-03 | -0.01 | 1.00E+00 |
| FBgn0031654 | Jon25Bii      | 14     | -0.12 | 2.89E-01 | -1.07 | 2.92E-02 | -0.01 | 1.00E+00 |
| FBgn0035665 | Jon65Aiii     | 69     | -0.02 | 8.87E-01 | -3.27 | 4.09E-03 | -0.02 | 9.06E-01 |
| FBgn0250815 | Jon65Aiv      | 95     | -0.01 | 9.39E-01 | -5.49 | 2.64E-04 | -0.02 | 1.00E+00 |
| FBgn0025820 | JTBR          | 391    | 0.66  | 1.51E-04 | 0.04  | 6.21E-01 | 0.00  | 1.00E+00 |
| FBgn0001296 | kar           | 177    | 0.71  | 1.82E-03 | 0.08  | 3.88E-01 | -0.01 | 1.00E+00 |
| FBgn0015399 | kek1          | 2777   | -0.75 | 1.30E-07 | -0.10 | 1.92E-01 | 0.15  | 8.10E-02 |
| FBgn0039925 | Kif3C         | 10     | -0.20 | 3.61E-01 | 0.22  | 1.84E-01 | 1.55  | 9.41E-03 |
| FBgn0001323 | knrl          | 445    | -0.98 | 3.52E-07 | 0.18  | 9.48E-02 | 0.00  | 1.00E+00 |
| FBgn0034098 | krimp         | 58     | 0.81  | 5.98E-03 | 0.02  | 8.22E-01 | 0.53  | 3.30E-02 |
| FBgn0040206 | krz           | 1877   | -0.74 | 4.98E-07 | 0.02  | 8.67E-01 | 0.00  | 1.00E+00 |
| FBgn0040890 | ksh           | 432    | 0.80  | 1.06E-04 | 0.01  | 9.07E-01 | 0.00  | 1.00E+00 |
| FBgn0041627 | Ku80          | 500    | -0.25 | 7.23E-02 | 1.10  | 1.85E-41 | 0.02  | 6.49E-01 |
| FBgn0036667 | kud           | 749    | 0.74  | 1.15E-04 | 0.01  | 9.30E-01 | 0.00  | 1.00E+00 |
| FBgn0259984 | kuz           | 2737   | -0.59 | 1.26E-03 | -0.04 | 6.48E-01 | 0.00  | 1.00E+00 |
| FBgn0040153 | l(1)G0469     | 354    | -0.48 | 2.80E-02 | -0.66 | 2.67E-03 | -0.01 | 1.00E+00 |
| FBgn0284251 | l(2)J5287     | 1676   | -0.58 | 6.07E-06 | 0.03  | 8.01E-01 | 0.00  | 1.00E+00 |
| FBgn0002031 | l(2)J37Cc     | 3950   | 0.63  | 7.33E-12 | 0.12  | 4.75E-02 | 0.00  | 1.00E+00 |
| FBgn0002121 | l(2)jl        | 5956   | -0.66 | 9.23E-06 | -0.03 | 7.39E-01 | 0.00  | 1.00E+00 |
| FBgn0284244 | l(2)k05911    | 1160   | -0.03 | 8.80E-01 | 0.95  | 2.58E-13 | -0.05 | 3.65E-01 |
| FBgn0035617 | l(3)psg2      | 1918   | -0.65 | 2.42E-05 | 0.04  | 6.68E-01 | 0.00  | 1.00E+00 |

|             |                |      |       |          |       |           |       |          |
|-------------|----------------|------|-------|----------|-------|-----------|-------|----------|
| FBgn0008651 | lbi            | 44   | 0.20  | 2.70E-01 | -2.03 | 4.28E-05  | 0.00  | 1.00E+00 |
| FBgn0001258 | Ldh            | 467  | 0.64  | 4.76E-03 | 1.77  | 2.03E-15  | 0.07  | 3.52E-01 |
| FBgn0016675 | Lectin-galC1   | 18   | 0.05  | 7.07E-01 | 1.81  | 1.00E-02  | 0.97  | 3.10E-02 |
| FBgn0034877 | levy           | 2150 | 0.87  | 1.58E-07 | 0.02  | 8.52E-01  | 0.00  | 1.00E+00 |
| FBgn0025692 | Lfg            | 29   | -0.11 | 6.55E-01 | -0.99 | 2.30E-02  | -0.02 | 8.66E-01 |
| FBgn0039907 | Igs            | 3040 | -0.63 | 1.33E-06 | -0.03 | 7.79E-01  | 0.00  | 1.00E+00 |
| FBgn0041111 | lilli          | 1423 | -0.65 | 1.41E-04 | -0.01 | 9.51E-01  | 0.00  | 1.00E+00 |
| FBgn0026411 | Lim1           | 66   | 0.31  | 1.24E-01 | -2.43 | 3.62E-08  | 0.01  | 1.00E+00 |
| FBgn0032253 | LManI          | 47   | -0.30 | 2.32E-01 | -0.82 | 3.71E-03  | -0.16 | 1.60E-01 |
| FBgn0027611 | LManII         | 658  | 0.16  | 5.25E-01 | -0.98 | 2.09E-04  | -0.03 | 7.07E-01 |
| FBgn0051044 | lncRNA:CR31044 | 109  | -0.62 | 1.51E-02 | -0.06 | 4.99E-01  | 0.00  | 1.00E+00 |
| FBgn0063127 | lncRNA:CR33938 | 820  | 2.12  | 4.16E-22 | 0.14  | 1.56E-01  | 0.00  | 1.00E+00 |
| FBgn0267910 | lncRNA:CR34335 | 7316 | 1.25  | 1.68E-05 | 0.02  | 8.76E-01  | 0.00  | 1.00E+00 |
| FBgn0259993 | lncRNA:CR42491 | 1363 | 0.61  | 4.70E-06 | 0.06  | 4.52E-01  | -0.94 | 5.20E-17 |
| FBgn0261813 | lncRNA:CR42755 | 10   | -0.25 | 2.06E-01 | -0.12 | 3.37E-01  | -2.47 | 2.02E-03 |
| FBgn0262620 | lncRNA:CR43144 | 765  | 0.08  | 7.87E-01 | 5.09  | 1.28E-279 | 0.02  | 7.45E-01 |
| FBgn0262886 | lncRNA:CR43241 | 230  | -1.36 | 3.84E-09 | 0.04  | 7.17E-01  | 0.00  | 1.00E+00 |
| FBgn0266827 | lncRNA:CR43334 | 202  | 0.33  | 1.75E-01 | 0.68  | 2.98E-02  | -0.03 | 7.07E-01 |
| FBgn0263415 | lncRNA:CR43461 | 36   | -0.06 | 8.34E-01 | 0.61  | 3.42E-02  | 0.00  | 1.00E+00 |
| FBgn0263617 | lncRNA:CR43626 | 25   | -0.89 | 4.25E-03 | 0.00  | 9.88E-01  | 0.00  | 1.00E+00 |
| FBgn0263626 | lncRNA:CR43635 | 12   | 0.86  | 5.82E-03 | 0.02  | 8.52E-01  | 0.00  | 1.00E+00 |
| FBgn0264721 | lncRNA:CR43989 | 32   | -0.04 | 9.11E-01 | 0.85  | 7.12E-03  | 0.01  | 1.00E+00 |
| FBgn0264794 | lncRNA:CR44024 | 20   | 0.03  | 9.25E-01 | 2.10  | 2.05E-06  | 0.00  | 1.00E+00 |
| FBgn0264834 | lncRNA:CR44042 | 177  | -0.77 | 1.55E-03 | 0.63  | 1.55E-03  | 0.00  | 1.00E+00 |
| FBgn0264942 | lncRNA:CR44111 | 42   | 0.09  | 5.34E-01 | 5.99  | 1.17E-27  | 0.00  | 1.00E+00 |
| FBgn0264984 | lncRNA:CR44135 | 23   | -0.29 | 1.06E-01 | 1.21  | 3.43E-03  | -0.01 | 1.00E+00 |
| FBgn0265422 | lncRNA:CR44334 | 427  | -0.68 | 3.70E-04 | 0.20  | 6.50E-02  | 0.01  | 8.66E-01 |
| FBgn0265497 | lncRNA:CR44366 | 18   | -0.66 | 1.58E-02 | -0.03 | 7.38E-01  | 0.00  | 1.00E+00 |
| FBgn0265651 | lncRNA:CR44458 | 17   | -0.04 | 8.81E-01 | 1.51  | 3.11E-03  | -0.01 | 1.00E+00 |
| FBgn0266049 | lncRNA:CR44814 | 120  | -1.88 | 1.42E-09 | 0.04  | 7.13E-01  | 0.00  | 1.00E+00 |
| FBgn0266051 | lncRNA:CR44816 | 80   | -1.42 | 2.27E-06 | 0.00  | 9.92E-01  | -0.01 | 1.00E+00 |
| FBgn0266414 | lncRNA:CR45054 | 19   | 0.14  | 3.83E-01 | 0.79  | 3.16E-02  | 0.00  | 1.00E+00 |
| FBgn0266549 | lncRNA:CR45102 | 308  | -2.24 | 1.22E-12 | 0.02  | 8.91E-01  | 0.00  | 1.00E+00 |
| FBgn0266691 | lncRNA:CR45181 | 18   | 0.87  | 5.43E-03 | 0.52  | 4.50E-02  | 0.01  | 9.89E-01 |
| FBgn0267793 | lncRNA:CR45232 | 366  | -0.73 | 3.43E-04 | -0.15 | 1.61E-01  | 0.00  | 1.00E+00 |
| FBgn0266866 | lncRNA:CR45327 | 19   | -0.60 | 2.28E-02 | -0.03 | 8.04E-01  | -0.01 | 1.00E+00 |
| FBgn0266958 | lncRNA:CR45409 | 159  | -1.00 | 1.92E-05 | -0.03 | 7.29E-01  | 0.00  | 1.00E+00 |
| FBgn0267029 | lncRNA:CR45473 | 135  | -0.38 | 7.22E-02 | 0.78  | 1.73E-05  | 0.01  | 1.00E+00 |
| FBgn0267073 | lncRNA:CR45517 | 44   | -0.04 | 8.97E-01 | 2.24  | 6.58E-11  | 0.04  | 5.85E-01 |
| FBgn0267126 | lncRNA:CR45566 | 684  | 0.92  | 7.68E-13 | 0.05  | 6.05E-01  | 0.00  | 1.00E+00 |
| FBgn0267635 | lncRNA:CR45973 | 81   | -0.26 | 3.03E-01 | 1.44  | 1.55E-08  | 0.00  | 1.00E+00 |
| FBgn0278598 | lncRNA:CR46268 | 190  | -1.19 | 1.56E-06 | 0.03  | 7.60E-01  | 0.00  | 1.00E+00 |
| FBgn0267585 | lncRNA:dntiRL  | 95   | -0.03 | 9.12E-01 | 1.02  | 6.17E-06  | 0.00  | 1.00E+00 |
| FBgn0022238 | lolal          | 3178 | -1.02 | 7.82E-19 | 0.05  | 5.82E-01  | 0.00  | 1.00E+00 |
| FBgn0052699 | LPCAT          | 956  | -0.61 | 5.17E-07 | 0.00  | 9.93E-01  | 0.00  | 1.00E+00 |
| FBgn0028582 | lof            | 1867 | -0.59 | 1.74E-08 | -0.01 | 9.20E-01  | 0.00  | 1.00E+00 |
| FBgn0267861 | Maf1           | 2161 | -0.95 | 1.80E-17 | 0.00  | 9.83E-01  | 0.00  | 1.00E+00 |
| FBgn0029979 | mahe           | 4391 | -0.78 | 1.42E-04 | -0.03 | 7.25E-01  | 0.00  | 1.00E+00 |
| FBgn0032382 | Mal-B2         | 163  | 0.24  | 3.10E-01 | 2.29  | 9.15E-07  | 0.00  | 1.00E+00 |
| FBgn0034282 | Mapmodulin     | 8990 | -0.84 | 1.93E-15 | 0.05  | 5.94E-01  | 0.00  | 1.00E+00 |
| FBgn0039972 | Marf1          | 212  | 0.44  | 4.74E-02 | 1.26  | 1.83E-10  | -0.01 | 1.00E+00 |
| FBgn0039914 | mav            | 2998 | -0.75 | 1.06E-16 | 0.07  | 3.67E-01  | 0.00  | 1.00E+00 |
| FBgn0035811 | Mcad           | 4056 | 0.66  | 1.26E-09 | -0.26 | 2.17E-03  | 0.00  | 1.00E+00 |
| FBgn0032929 | Mcm10          | 613  | -0.83 | 1.75E-08 | 0.06  | 4.99E-01  | 0.02  | 7.84E-01 |
| FBgn0284442 | Mcm3           | 2442 | 0.59  | 1.94E-05 | -0.01 | 9.16E-01  | 0.00  | 1.00E+00 |
| FBgn0032116 | Mco1           | 31   | -0.16 | 5.19E-01 | -0.74 | 2.10E-02  | 0.00  | 1.00E+00 |
| FBgn0262782 | Mdh1           | 2243 | 0.69  | 7.72E-06 | -0.03 | 7.73E-01  | 0.00  | 1.00E+00 |
| FBgn0262559 | Mdh2           | 2464 | 0.61  | 1.94E-06 | 0.05  | 5.86E-01  | 0.00  | 1.00E+00 |
| FBgn0034707 | MED16          | 746  | 0.29  | 2.14E-02 | -0.58 | 1.75E-11  | 0.00  | 1.00E+00 |
| FBgn0039923 | MED26          | 3695 | -0.93 | 2.24E-08 | -0.04 | 6.74E-01  | 0.00  | 1.00E+00 |
| FBgn0039337 | MED28          | 361  | 0.64  | 1.35E-03 | 0.03  | 7.60E-01  | 0.00  | 1.00E+00 |
| FBgn0024556 | mEFTu1         | 2555 | 0.70  | 8.55E-10 | 0.15  | 4.44E-02  | 0.00  | 1.00E+00 |
| FBgn0039851 | mey            | 1124 | 1.29  | 3.47E-17 | 1.26  | 1.81E-23  | 1.01  | 3.55E-15 |
| FBgn0031307 | MFS3           | 3325 | 0.69  | 9.89E-07 | 0.00  | 9.93E-01  | 0.00  | 1.00E+00 |
| FBgn0025814 | Mgst1          | 739  | 0.87  | 2.43E-05 | -0.03 | 7.47E-01  | 0.00  | 1.00E+00 |
| FBgn0036333 | MICAL-like     | 1637 | -0.63 | 2.14E-13 | -0.12 | 3.63E-02  | 0.00  | 1.00E+00 |
| FBgn0261963 | mid            | 203  | 0.43  | 4.48E-02 | -0.58 | 3.07E-03  | 0.01  | 1.00E+00 |
| FBgn0039250 | Mink           | 2302 | -0.60 | 9.89E-07 | -0.06 | 4.88E-01  | 0.00  | 1.00E+00 |
| FBgn0026061 | Mipp1          | 38   | 1.35  | 5.54E-04 | 0.00  | 9.98E-01  | 0.00  | 1.00E+00 |
| FBgn0263112 | Mitf           | 2077 | -0.73 | 4.40E-07 | 0.00  | 9.90E-01  | 0.04  | 4.11E-01 |
| FBgn0024326 | Mkk4           | 1861 | -0.65 | 1.15E-11 | -0.02 | 9.00E-01  | 0.00  | 1.00E+00 |
| FBgn0002774 | mle            | 2065 | -0.88 | 3.04E-14 | -0.08 | 2.61E-01  | 0.00  | 1.00E+00 |
| FBgn0259168 | mb             | 2631 | -0.67 | 4.00E-06 | -0.05 | 6.05E-01  | 0.00  | 1.00E+00 |
| FBgn0263241 | Mocs1          | 299  | 0.02  | 9.55E-01 | 1.00  | 6.99E-12  | -0.02 | 7.07E-01 |
| FBgn0026409 | Mpcp2          | 7899 | 0.69  | 8.14E-23 | 0.05  | 5.80E-01  | 0.00  | 1.00E+00 |
| FBgn0020270 | mre11          | 1699 | 0.34  | 1.30E-03 | 1.11  | 7.59E-75  | 0.35  | 3.50E-07 |
| FBgn0034091 | mrj            | 966  | -0.79 | 8.03E-13 | -0.01 | 9.45E-01  | 0.00  | 1.00E+00 |
| FBgn0032456 | MRP            | 3772 | 0.06  | 7.35E-01 | 1.55  | 5.28E-48  | 0.00  | 1.00E+00 |
| FBgn0011787 | mRpL12         | 969  | 0.91  | 4.58E-07 | 0.02  | 8.61E-01  | 0.00  | 1.00E+00 |

|             |                |        |       |           |       |          |       |          |
|-------------|----------------|--------|-------|-----------|-------|----------|-------|----------|
| FBgn0035122 | mRpL17         | 461    | 0.68  | 2.30E-05  | 0.04  | 6.74E-01 | 0.00  | 1.00E+00 |
| FBgn0036135 | mRpL2          | 767    | 0.65  | 2.40E-05  | 0.01  | 9.37E-01 | 0.00  | 1.00E+00 |
| FBgn0040907 | mRpL33         | 284    | 1.11  | 1.42E-07  | 0.00  | 9.86E-01 | -0.01 | 1.00E+00 |
| FBgn0038923 | mRpL35         | 302    | 0.61  | 9.42E-04  | -0.01 | 9.37E-01 | 0.00  | 1.00E+00 |
| FBgn0030552 | mRpL38         | 817    | 0.65  | 1.45E-05  | 0.02  | 8.73E-01 | 0.00  | 1.00E+00 |
| FBgn0037330 | mRpL44         | 725    | 0.66  | 2.81E-05  | 0.02  | 8.52E-01 | 0.00  | 1.00E+00 |
| FBgn0031357 | mRpL48         | 312    | 0.58  | 5.52E-03  | 0.01  | 9.18E-01 | 0.00  | 1.00E+00 |
| FBgn0030433 | mRpL49         | 450    | 0.84  | 2.67E-05  | 0.03  | 8.00E-01 | 0.00  | 1.00E+00 |
| FBgn0028648 | mRpL50         | 407    | 0.69  | 2.41E-04  | 0.01  | 9.24E-01 | 0.00  | 1.00E+00 |
| FBgn0032053 | mRpL51         | 425    | 0.96  | 1.82E-08  | 0.01  | 9.68E-01 | -0.01 | 1.00E+00 |
| FBgn0033208 | mRpL52         | 367    | 0.95  | 2.88E-07  | 0.03  | 7.47E-01 | 0.00  | 1.00E+00 |
| FBgn0038678 | mRpL55         | 253    | 0.72  | 4.36E-04  | 0.00  | 9.72E-01 | 0.00  | 1.00E+00 |
| FBgn0044030 | mRpS14         | 193    | 1.02  | 3.28E-05  | 0.07  | 4.31E-01 | 0.00  | 1.00E+00 |
| FBgn0030572 | mRpS25         | 392    | 0.59  | 8.81E-04  | 0.03  | 7.83E-01 | 0.00  | 1.00E+00 |
| FBgn0044510 | mRpS5          | 493    | -0.93 | 9.94E-07  | -0.01 | 9.26E-01 | 0.00  | 1.00E+00 |
| FBgn0011666 | msi            | 2622   | -0.62 | 3.63E-04  | 0.01  | 9.71E-01 | 0.00  | 1.00E+00 |
| FBgn0027948 | msps           | 6613   | -0.62 | 3.50E-06  | -0.01 | 9.70E-01 | 0.00  | 1.00E+00 |
| FBgn0013672 | mtATPase6      | 7880   | -3.31 | 5.37E-41  | -0.02 | 8.94E-01 | 0.00  | 1.00E+00 |
| FBgn0013673 | mtATPase8      | 1600   | -3.84 | 3.78E-230 | 0.02  | 9.06E-01 | 0.02  | 9.34E-01 |
| FBgn0013674 | mtCol          | 59337  | -0.61 | 1.51E-02  | 0.01  | 8.92E-01 | 0.00  | 1.00E+00 |
| FBgn0013675 | mtColl         | 18791  | -1.47 | 1.12E-09  | 0.00  | 9.75E-01 | -0.01 | 1.00E+00 |
| FBgn0013686 | mtlrrRNA       | 420131 | -2.84 | 3.45E-10  | 0.02  | 8.37E-01 | 0.00  | 1.00E+00 |
| FBgn0013679 | mtND1          | 4891   | -3.62 | 7.13E-14  | 0.02  | 8.91E-01 | 0.00  | 1.00E+00 |
| FBgn0013680 | mtND2          | 1185   | -4.38 | 3.24E-10  | -0.03 | 7.42E-01 | 0.00  | 1.00E+00 |
| FBgn0013681 | mtND3          | 583    | -3.85 | 7.22E-11  | 0.02  | 8.24E-01 | 0.01  | 1.00E+00 |
| FBgn0262952 | mtND4          | 3538   | -2.38 | 7.67E-11  | 0.04  | 7.12E-01 | 0.00  | 1.00E+00 |
| FBgn0013684 | mtND5          | 6582   | -2.51 | 1.53E-58  | 0.00  | 9.88E-01 | 0.03  | 4.80E-01 |
| FBgn0013685 | mtND6          | 440    | -0.91 | 5.02E-03  | -0.02 | 8.68E-01 | 0.00  | 1.00E+00 |
| FBgn0013688 | mtsrrRNA       | 534    | -0.37 | 6.27E-02  | 1.14  | 2.01E-02 | 0.00  | 1.00E+00 |
| FBgn0013698 | mttRNA:Leu-TAG | 25     | -2.56 | 3.95E-05  | 0.02  | 9.10E-01 | 0.00  | 1.00E+00 |
| FBgn0013710 | mttRNA:Tyr-GTA | 24     | -0.61 | 2.14E-02  | -0.01 | 9.71E-01 | 0.00  | 1.00E+00 |
| FBgn0028956 | mthl3          | 3240   | -0.66 | 8.47E-16  | 0.05  | 5.44E-01 | 0.00  | 1.00E+00 |
| FBgn0034219 | mthl4          | 587    | -0.91 | 1.26E-09  | -0.02 | 8.83E-01 | 0.00  | 1.00E+00 |
| FBgn0052475 | mthl8          | 493    | -0.52 | 7.63E-04  | -0.06 | 6.13E-01 | 10.83 | 1.59E-36 |
| FBgn0025352 | Mtpbeta        | 4531   | 0.62  | 3.72E-12  | -0.09 | 1.74E-01 | 0.00  | 1.00E+00 |
| FBgn0262737 | mub            | 5736   | -0.69 | 5.78E-07  | -0.05 | 5.79E-01 | 0.00  | 1.00E+00 |
| FBgn0002887 | mus201         | 555    | -0.84 | 2.67E-06  | 0.57  | 8.19E-05 | 0.00  | 1.00E+00 |
| FBgn0264272 | mwh            | 95     | -0.49 | 2.83E-02  | -1.28 | 1.73E-08 | 0.00  | 1.00E+00 |
| FBgn0262656 | Myc            | 3026   | -1.25 | 4.29E-08  | 0.01  | 9.30E-01 | 0.00  | 1.00E+00 |
| FBgn0026199 | myo            | 1852   | -1.04 | 1.52E-11  | 0.02  | 8.64E-01 | 0.00  | 1.00E+00 |
| FBgn0039157 | Myo95E         | 879    | -0.68 | 4.80E-07  | 0.00  | 9.96E-01 | 0.00  | 1.00E+00 |
| FBgn0051216 | Naam           | 156    | -0.21 | 3.64E-01  | 0.62  | 4.56E-04 | 0.01  | 1.00E+00 |
| FBgn0086904 | Nacalpha       | 17191  | 0.66  | 9.52E-13  | -0.05 | 5.39E-01 | 0.00  | 1.00E+00 |
| FBgn0260795 | NaPI-III       | 1252   | -0.59 | 1.45E-05  | -0.07 | 3.45E-01 | -0.04 | 4.03E-01 |
| FBgn0085417 | natalisin      | 246    | 1.08  | 1.55E-09  | 0.12  | 1.55E-01 | 0.02  | 6.27E-01 |
| FBgn0013303 | Nca            | 871    | -0.82 | 8.10E-09  | -0.03 | 8.10E-01 | 0.00  | 1.00E+00 |
| FBgn0086707 | ncm            | 2162   | -1.09 | 8.23E-10  | 0.03  | 7.48E-01 | 0.00  | 1.00E+00 |
| FBgn0031021 | ND-18          | 707    | 0.84  | 1.01E-05  | 0.08  | 3.70E-01 | 0.00  | 1.00E+00 |
| FBgn0266582 | ND-30          | 1362   | 0.67  | 1.79E-09  | 0.04  | 6.37E-01 | 0.00  | 1.00E+00 |
| FBgn0037001 | ND-39          | 2350   | 0.93  | 2.39E-21  | 0.03  | 7.96E-01 | -0.01 | 1.00E+00 |
| FBgn0058002 | ND-AGGG        | 176    | -1.41 | 4.06E-09  | 0.04  | 6.30E-01 | 0.00  | 1.00E+00 |
| FBgn0034645 | ND-B12         | 751    | 0.88  | 5.97E-07  | -0.06 | 4.68E-01 | 0.00  | 1.00E+00 |
| FBgn0025839 | ND-B14.5A      | 357    | 0.75  | 3.67E-05  | 0.06  | 5.10E-01 | 0.00  | 1.00E+00 |
| FBgn0034576 | ND-B14.7       | 900    | 0.81  | 1.14E-06  | 0.04  | 6.74E-01 | 0.00  | 1.00E+00 |
| FBgn0033961 | ND-B15         | 514    | 0.94  | 2.40E-06  | 0.03  | 7.82E-01 | 0.00  | 1.00E+00 |
| FBgn0029868 | ND-B16.6       | 1491   | 0.95  | 1.26E-13  | 0.02  | 9.07E-01 | 0.00  | 1.00E+00 |
| FBgn0001989 | ND-B17         | 829    | 0.73  | 7.01E-07  | -0.01 | 9.18E-01 | 0.00  | 1.00E+00 |
| FBgn0031436 | ND-B17.2       | 939    | 1.38  | 2.39E-21  | -0.01 | 9.33E-01 | 0.00  | 1.00E+00 |
| FBgn0030605 | ND-B18         | 697    | 0.72  | 1.67E-08  | 0.07  | 4.19E-01 | 0.00  | 1.00E+00 |
| FBgn0085468 | ND-MWFE        | 607    | 0.80  | 3.40E-05  | 0.00  | 9.82E-01 | 0.00  | 1.00E+00 |
| FBgn0021967 | ND-PDSW        | 1240   | 1.05  | 1.19E-06  | 0.10  | 2.58E-01 | 0.00  | 1.00E+00 |
| FBgn0017430 | Nelf-E         | 566    | 0.19  | 2.49E-01  | 0.51  | 4.14E-07 | 0.90  | 5.05E-21 |
| FBgn0027570 | Nep2           | 1864   | 0.24  | 1.37E-01  | -1.19 | 2.14E-22 | -0.72 | 4.22E-08 |
| FBgn0039564 | Nep7           | 118    | 0.99  | 2.44E-04  | 0.02  | 8.45E-01 | 0.10  | 2.75E-01 |
| FBgn0032393 | Nfs1           | 892    | 0.16  | 3.80E-01  | 1.00  | 1.30E-19 | 0.00  | 1.00E+00 |
| FBgn0036101 | NijA           | 1536   | -0.22 | 1.07E-01  | -0.38 | 2.26E-04 | -0.67 | 1.96E-10 |
| FBgn0038079 | NijC           | 67     | 0.83  | 2.32E-03  | 0.01  | 9.16E-01 | -0.01 | 1.00E+00 |
| FBgn0259896 | NimC1          | 57     | 0.18  | 4.82E-01  | -2.27 | 4.02E-06 | -0.01 | 1.00E+00 |
| FBgn0026401 | Nipped-B       | 5024   | -1.01 | 7.71E-10  | 0.01  | 9.69E-01 | 0.00  | 1.00E+00 |
| FBgn0024321 | NK7.1          | 331    | -0.67 | 2.02E-04  | -0.02 | 8.22E-01 | 0.03  | 5.71E-01 |
| FBgn0051547 | NKCC           | 84     | 0.03  | 9.36E-01  | 1.28  | 1.77E-03 | -0.01 | 1.00E+00 |
| FBgn0031866 | Nlg2           | 15     | 2.40  | 3.35E-04  | -0.03 | 7.75E-01 | 0.00  | 1.00E+00 |
| FBgn0011817 | nmo            | 3519   | -0.72 | 9.06E-07  | 0.04  | 6.54E-01 | 0.00  | 1.00E+00 |
| FBgn0037617 | nom            | 365    | -0.63 | 4.56E-04  | 0.05  | 6.11E-01 | 0.01  | 1.00E+00 |
| FBgn0015520 | nonA-1         | 647    | -0.65 | 1.76E-06  | -0.11 | 1.51E-01 | 0.00  | 1.00E+00 |
| FBgn0033029 | NoI3           | 5518   | -0.69 | 2.88E-13  | -0.05 | 5.72E-01 | 0.00  | 1.00E+00 |
| FBgn0027785 | NP15.6         | 1071   | 1.36  | 1.53E-13  | 0.02  | 8.85E-01 | 0.00  | 1.00E+00 |
| FBgn0031381 | Npc2a          | 201    | 0.59  | 1.30E-02  | -0.01 | 9.10E-01 | 0.00  | 1.00E+00 |
| FBgn0035092 | Nplp1          | 42     | -0.16 | 5.61E-01  | -1.43 | 6.65E-05 | 0.00  | 1.00E+00 |

|             |            |       |       |          |       |          |       |          |
|-------------|------------|-------|-------|----------|-------|----------|-------|----------|
| FBgn0040717 | Nplp4      | 686   | 1.01  | 6.07E-04 | -0.62 | 1.63E-02 | 0.96  | 4.01E-03 |
| FBgn0261526 | NT1        | 183   | -0.07 | 8.23E-01 | -0.80 | 1.26E-03 | 0.00  | 1.00E+00 |
| FBgn0028411 | Nxt1       | 883   | 0.59  | 7.17E-04 | 0.13  | 1.56E-01 | 0.00  | 1.00E+00 |
| FBgn0027791 | O-fut2     | 218   | 0.96  | 2.28E-05 | 0.00  | 9.76E-01 | 0.00  | 1.00E+00 |
| FBgn0022774 | Oat        | 220   | -0.06 | 8.35E-01 | -0.69 | 2.98E-02 | -0.01 | 1.00E+00 |
| FBgn0038344 | obe        | 1568  | -0.17 | 2.99E-01 | 0.87  | 8.91E-14 | 0.01  | 1.00E+00 |
| FBgn0046875 | Obp83g     | 76    | 1.39  | 1.93E-05 | -0.07 | 4.76E-01 | 0.00  | 1.00E+00 |
| FBgn0039678 | Obp99a     | 345   | 2.49  | 2.05E-15 | -2.20 | 1.17E-27 | 0.00  | 1.00E+00 |
| FBgn0027600 | obst-B     | 1761  | 0.83  | 9.71E-08 | -0.04 | 6.25E-01 | 0.00  | 1.00E+00 |
| FBgn0028996 | onecut     | 28    | -0.17 | 4.64E-01 | 2.85  | 7.82E-12 | 0.04  | 6.14E-01 |
| FBgn0028393 | Or43b      | 242   | -0.70 | 3.46E-05 | 0.04  | 7.13E-01 | 0.00  | 1.00E+00 |
| FBgn0039551 | Or98a      | 41    | -0.03 | 8.31E-01 | 8.76  | 7.97E-13 | 0.00  | 1.00E+00 |
| FBgn0040279 | Osi14      | 132   | 0.95  | 6.82E-04 | 1.56  | 3.99E-09 | 0.18  | 1.42E-01 |
| FBgn0032197 | ova        | 1116  | -0.77 | 3.32E-07 | 0.00  | 9.86E-01 | 0.00  | 1.00E+00 |
| FBgn0011227 | ox         | 799   | 2.14  | 2.56E-01 | 0.02  | 6.38E-01 | 0.00  | 1.00E+00 |
| FBgn0260799 | p120ctn    | 3379  | -1.11 | 1.81E-16 | 0.00  | 9.86E-01 | 0.00  | 1.00E+00 |
| FBgn0265297 | pAbp       | 44968 | -0.66 | 4.08E-04 | 0.02  | 8.24E-01 | 0.00  | 1.00E+00 |
| FBgn0005648 | Pabp2      | 4791  | -0.80 | 3.13E-09 | 0.15  | 7.73E-02 | 0.00  | 1.00E+00 |
| FBgn0060296 | pain       | 1156  | -0.10 | 5.67E-01 | -0.63 | 8.12E-08 | -0.03 | 4.82E-01 |
| FBgn0038100 | Paip2      | 1311  | -0.80 | 1.58E-07 | 0.00  | 1.00E+00 | 0.00  | 1.00E+00 |
| FBgn0085432 | pan        | 2131  | -0.59 | 6.42E-03 | 0.00  | 9.77E-01 | 0.00  | 1.00E+00 |
| FBgn0035397 | PAN3       | 3490  | -0.71 | 4.02E-11 | -0.10 | 1.74E-01 | 0.00  | 1.00E+00 |
| FBgn0010247 | Parp       | 2656  | -0.94 | 3.12E-08 | 0.38  | 6.00E-03 | 0.00  | 1.00E+00 |
| FBgn0036007 | path       | 4128  | 0.03  | 8.74E-01 | 0.03  | 8.10E-01 | 0.80  | 5.05E-13 |
| FBgn0027580 | PCB        | 2192  | 0.26  | 2.54E-01 | -0.84 | 2.06E-04 | -0.02 | 7.92E-01 |
| FBgn0024841 | Pcd        | 661   | 0.96  | 6.82E-08 | -0.02 | 8.22E-01 | 0.00  | 1.00E+00 |
| FBgn0086768 | Pcmt       | 1557  | 0.98  | 5.51E-10 | 0.02  | 8.59E-01 | 0.00  | 1.00E+00 |
| FBgn0005655 | PCNA       | 4886  | 0.69  | 2.73E-15 | 0.06  | 3.90E-01 | 0.00  | 1.00E+00 |
| FBgn0036580 | PDCCD-5    | 930   | 0.91  | 5.47E-08 | 0.04  | 6.66E-01 | 0.00  | 1.00E+00 |
| FBgn0039635 | Pdhh       | 1804  | 0.61  | 4.78E-04 | 0.03  | 7.61E-01 | 0.00  | 1.00E+00 |
| FBgn0016694 | Pdp1       | 373   | -1.14 | 5.67E-06 | 0.00  | 9.98E-01 | 0.00  | 1.00E+00 |
| FBgn0031969 | pes        | 393   | -0.80 | 8.68E-06 | 0.00  | 9.86E-01 | 0.00  | 1.00E+00 |
| FBgn0031530 | Pgant2     | 288   | 0.65  | 9.45E-04 | 0.04  | 6.43E-01 | 0.00  | 1.00E+00 |
| FBgn0031681 | Pgant5     | 2854  | -0.59 | 8.73E-06 | -0.05 | 5.36E-01 | 0.00  | 1.00E+00 |
| FBgn0014869 | Pglym78    | 1405  | 0.87  | 6.68E-09 | 0.25  | 1.76E-02 | 0.00  | 1.00E+00 |
| FBgn0035976 | PGRP-LC    | 112   | 0.10  | 7.03E-01 | -0.74 | 1.85E-04 | -1.41 | 7.16E-13 |
| FBgn0035438 | PHGPx      | 2555  | 0.73  | 1.23E-05 | 0.04  | 7.06E-01 | 0.00  | 1.00E+00 |
| FBgn0035089 | Phk-3      | 2712  | 0.81  | 2.59E-09 | -0.04 | 6.45E-01 | -0.01 | 1.00E+00 |
| FBgn0002521 | pho        | 2284  | -1.27 | 2.01E-21 | -0.06 | 5.03E-01 | 0.00  | 1.00E+00 |
| FBgn0036522 | Phs        | 2259  | -0.66 | 1.14E-07 | 0.03  | 7.54E-01 | 0.00  | 1.00E+00 |
| FBgn0033479 | PIG-N      | 188   | -0.69 | 2.91E-04 | -0.08 | 3.40E-01 | 0.00  | 1.00E+00 |
| FBgn0086448 | PIG-O      | 352   | -0.84 | 5.87E-05 | -0.10 | 2.17E-01 | -0.01 | 1.00E+00 |
| FBgn0038966 | pinta      | 68    | -0.07 | 8.23E-01 | 2.59  | 5.85E-18 | 1.24  | 2.00E-04 |
| FBgn0038924 | PIP4K      | 2088  | -0.89 | 2.33E-15 | -0.03 | 8.07E-01 | -0.01 | 1.00E+00 |
| FBgn0030400 | Piis       | 2206  | -0.74 | 4.02E-07 | 0.01  | 9.52E-01 | 0.00  | 1.00E+00 |
| FBgn0004872 | piwi       | 37    | -0.40 | 1.07E-01 | -0.69 | 2.81E-02 | 0.00  | 1.00E+00 |
| FBgn0022382 | Pka-R2     | 572   | -0.62 | 4.35E-03 | 0.01  | 9.63E-01 | 0.00  | 1.00E+00 |
| FBgn0036192 | Pldn       | 144   | -0.60 | 3.59E-03 | -0.02 | 8.38E-01 | 0.00  | 1.00E+00 |
| FBgn0259214 | PMCA       | 7693  | -0.73 | 5.33E-08 | -0.01 | 9.33E-01 | 0.00  | 1.00E+00 |
| FBgn0037737 | Pnn        | 621   | -0.66 | 3.63E-06 | 0.00  | 9.86E-01 | 0.00  | 1.00E+00 |
| FBgn0036696 | Pop5       | 239   | 0.63  | 2.04E-03 | 0.17  | 9.54E-02 | 0.01  | 1.00E+00 |
| FBgn0003130 | Poxn       | 231   | 0.63  | 5.12E-04 | 0.64  | 4.29E-06 | 0.05  | 3.88E-01 |
| FBgn0053508 | ppk13      | 1275  | -0.27 | 1.10E-01 | 1.86  | 1.49E-64 | 0.45  | 1.10E-03 |
| FBgn0261363 | PPO3       | 59    | 0.63  | 1.08E-02 | 0.03  | 7.94E-01 | 0.00  | 1.00E+00 |
| FBgn0011474 | PR-Set7    | 2050  | -0.63 | 3.34E-05 | 0.01  | 9.28E-01 | 0.00  | 1.00E+00 |
| FBgn0033635 | Prjp       | 107   | -0.08 | 7.73E-01 | -0.62 | 4.40E-03 | -0.06 | 3.60E-01 |
| FBgn0086134 | Prosalpha2 | 4106  | 0.70  | 1.72E-16 | -0.03 | 7.26E-01 | -0.03 | 5.00E-01 |
| FBgn0261394 | Prosalpha3 | 3487  | 0.71  | 2.64E-08 | -0.03 | 7.85E-01 | 0.00  | 1.00E+00 |
| FBgn0027587 | Prp4k      | 992   | -0.65 | 1.36E-11 | 0.03  | 7.55E-01 | 0.16  | 1.67E-02 |
| FBgn0033518 | Prx2540-2  | 56    | 0.53  | 4.22E-02 | -0.62 | 1.93E-02 | 0.00  | 1.00E+00 |
| FBgn0035770 | pst        | 722   | 0.88  | 2.24E-04 | 0.18  | 1.36E-01 | 0.00  | 1.00E+00 |
| FBgn0026379 | Pten       | 1333  | -0.83 | 2.36E-09 | -0.05 | 5.30E-01 | 0.00  | 1.00E+00 |
| FBgn0034085 | Ptp52F     | 12    | -0.16 | 4.59E-01 | -0.29 | 1.17E-01 | -0.60 | 3.13E-02 |
| FBgn0014007 | Ptp69D     | 2086  | -0.89 | 2.12E-13 | -0.14 | 6.28E-02 | 0.00  | 1.00E+00 |
| FBgn0243512 | puc        | 688   | -0.86 | 6.08E-06 | 0.00  | 9.80E-01 | -0.01 | 1.00E+00 |
| FBgn0033226 | puml       | 453   | 0.27  | 1.11E-01 | 0.65  | 3.52E-09 | 0.01  | 1.00E+00 |
| FBgn0022361 | Pur-alpha  | 1438  | -1.00 | 6.23E-08 | 0.01  | 9.30E-01 | 0.00  | 1.00E+00 |
| FBgn0004577 | Pxd        | 86    | -0.01 | 9.75E-01 | -0.87 | 3.05E-02 | -0.03 | 6.72E-01 |
| FBgn0033649 | pyr        | 313   | -0.85 | 3.77E-07 | -0.05 | 5.43E-01 | 0.00  | 1.00E+00 |
| FBgn0052412 | QC         | 164   | 0.44  | 5.93E-02 | -0.01 | 9.12E-01 | -1.14 | 2.11E-06 |
| FBgn0022987 | qkr54B     | 1628  | -1.10 | 1.29E-12 | -0.05 | 5.42E-01 | 0.00  | 1.00E+00 |
| FBgn0022986 | qkr58E-1   | 1684  | -0.95 | 7.55E-09 | -0.02 | 8.81E-01 | 0.00  | 1.00E+00 |
| FBgn0022984 | qkr58E-3   | 1887  | -0.87 | 6.58E-09 | 0.06  | 4.61E-01 | 0.00  | 1.00E+00 |
| FBgn0051864 | Qtzl       | 82    | -0.35 | 1.62E-01 | 1.34  | 6.16E-08 | -0.01 | 9.19E-01 |
| FBgn0014010 | Rab5       | 3111  | -0.75 | 1.02E-15 | 0.00  | 9.99E-01 | -0.01 | 1.00E+00 |
| FBgn0030290 | RabX2      | 20    | 0.03  | 8.57E-01 | 6.65  | 2.74E-11 | 0.00  | 1.00E+00 |
| FBgn0014011 | Rac2       | 1610  | -0.87 | 1.83E-12 | -0.04 | 6.69E-01 | -0.01 | 1.00E+00 |
| FBgn0020618 | Rack1      | 56381 | 1.07  | 6.74E-36 | -0.32 | 1.48E-05 | 0.00  | 1.00E+00 |
| FBgn0034728 | rad50      | 1403  | -0.96 | 1.79E-10 | 0.87  | 1.40E-13 | 0.01  | 9.73E-01 |

|             |              |       |       |          |       |          |       |          |
|-------------|--------------|-------|-------|----------|-------|----------|-------|----------|
| FBgn0034646 | Rae1         | 1214  | 0.61  | 3.94E-06 | 0.06  | 4.85E-01 | 0.00  | 1.00E+00 |
| FBgn0003079 | Raf          | 1265  | -0.81 | 2.61E-16 | -0.03 | 7.61E-01 | 0.00  | 1.00E+00 |
| FBgn0039110 | RanBP3       | 2099  | 0.62  | 1.98E-08 | -0.02 | 8.88E-01 | -0.01 | 9.85E-01 |
| FBgn0004636 | Rap1         | 4020  | -1.04 | 1.23E-12 | -0.01 | 9.55E-01 | 0.00  | 1.00E+00 |
| FBgn0031745 | rau          | 255   | 0.61  | 1.41E-03 | -0.05 | 5.50E-01 | 0.00  | 1.00E+00 |
| FBgn0030479 | Rbp1-like    | 2083  | -1.39 | 8.00E-35 | 0.06  | 4.91E-01 | 0.01  | 1.00E+00 |
| FBgn0031047 | Rcd-1        | 3879  | 0.62  | 4.92E-07 | -0.02 | 8.48E-01 | 0.00  | 1.00E+00 |
| FBgn0039644 | rdog         | 430   | -0.19 | 4.02E-01 | 2.41  | 3.73E-52 | 0.00  | 1.00E+00 |
| FBgn0264493 | rdx          | 1794  | -0.80 | 1.57E-15 | 0.00  | 9.77E-01 | 0.01  | 1.00E+00 |
| FBgn0027375 | RecQ5        | 730   | -1.02 | 3.31E-11 | 0.00  | 1.00E+00 | 0.01  | 1.00E+00 |
| FBgn0021800 | Reph         | 522   | -0.83 | 9.85E-06 | 0.07  | 4.30E-01 | 0.01  | 9.70E-01 |
| FBgn0021906 | RFeSP        | 1542  | 0.74  | 6.01E-07 | 0.06  | 5.05E-01 | -0.01 | 1.00E+00 |
| FBgn0014020 | Rho1         | 8527  | -0.78 | 9.28E-22 | 0.03  | 7.71E-01 | 0.00  | 1.00E+00 |
| FBgn0265605 | Ric          | 315   | -0.61 | 4.46E-04 | -0.02 | 8.59E-01 | 0.00  | 1.00E+00 |
| FBgn0003256 | r1           | 1022  | -0.65 | 3.22E-05 | -0.01 | 9.40E-01 | 0.00  | 1.00E+00 |
| FBgn0014022 | Rib1         | 390   | -0.84 | 1.02E-05 | 0.04  | 6.98E-01 | 0.00  | 1.00E+00 |
| FBgn0262116 | RNASEK       | 1235  | -0.70 | 2.47E-07 | 0.09  | 2.58E-01 | -0.03 | 5.42E-01 |
| FBgn0065098 | RNaseMRP:RNA | 80    | 4.59  | 4.42E-10 | 0.57  | 3.60E-02 | -0.03 | 6.87E-01 |
| FBgn0046696 | RNaseP:RNA   | 131   | 2.12  | 4.96E-12 | 0.05  | 5.84E-01 | 0.00  | 1.00E+00 |
| FBgn0250838 | roh          | 1748  | 0.64  | 8.88E-05 | -0.03 | 7.61E-01 | 0.00  | 1.00E+00 |
| FBgn0005649 | Rox8         | 5628  | -0.89 | 7.39E-27 | -0.13 | 3.05E-02 | 0.00  | 1.00E+00 |
| FBgn0010173 | RpA-70       | 3830  | -0.17 | 1.04E-01 | 0.58  | 8.68E-17 | 0.00  | 1.00E+00 |
| FBgn0262954 | Rpb12        | 562   | 1.01  | 4.13E-07 | 0.06  | 4.95E-01 | -0.01 | 9.40E-01 |
| FBgn0050499 | Rpe          | 1477  | 0.82  | 4.26E-11 | -0.02 | 8.91E-01 | 0.00  | 1.00E+00 |
| FBgn0004855 | Rpl115       | 1036  | 0.63  | 2.77E-06 | -0.01 | 9.39E-01 | -0.01 | 1.00E+00 |
| FBgn0026373 | Rpl133       | 900   | 0.63  | 3.15E-05 | 0.02  | 8.21E-01 | 0.00  | 1.00E+00 |
| FBgn0022981 | rpK          | 458   | 0.06  | 7.97E-01 | 0.75  | 1.76E-08 | -0.01 | 1.00E+00 |
| FBgn0036213 | RpL10Ab      | 42243 | 0.74  | 3.62E-14 | -0.35 | 3.27E-05 | 0.00  | 1.00E+00 |
| FBgn0013325 | RpL11        | 28172 | 0.92  | 3.13E-18 | -0.02 | 8.26E-01 | 0.00  | 1.00E+00 |
| FBgn0034968 | RpL12        | 29887 | 0.59  | 9.92E-06 | -0.13 | 1.05E-01 | 0.00  | 1.00E+00 |
| FBgn0011272 | RpL13        | 31038 | 1.32  | 7.08E-19 | 0.01  | 9.16E-01 | 0.00  | 1.00E+00 |
| FBgn0037351 | RpL13A       | 29649 | 1.58  | 4.20E-41 | -0.03 | 7.96E-01 | 0.00  | 1.00E+00 |
| FBgn0017579 | RpL14        | 24860 | 1.54  | 1.76E-29 | -0.04 | 7.13E-01 | 0.00  | 1.00E+00 |
| FBgn0029897 | RpL17        | 24696 | 1.51  | 2.72E-26 | -0.03 | 7.43E-01 | 0.00  | 1.00E+00 |
| FBgn0035753 | RpL18        | 25719 | 1.26  | 6.13E-19 | -0.04 | 7.01E-01 | 0.00  | 1.00E+00 |
| FBgn0010409 | RpL18A       | 33698 | 1.19  | 5.09E-22 | 0.01  | 9.46E-01 | 0.00  | 1.00E+00 |
| FBgn0285950 | RpL19        | 37514 | 0.70  | 2.79E-10 | -0.02 | 8.39E-01 | 0.00  | 1.00E+00 |
| FBgn0034837 | RpL22-like   | 14    | 0.31  | 1.65E-01 | -2.96 | 6.20E-04 | 0.00  | 1.00E+00 |
| FBgn0010078 | RpL23        | 29740 | 1.18  | 6.09E-15 | -0.01 | 9.33E-01 | 0.00  | 1.00E+00 |
| FBgn0032518 | RpL24        | 20688 | 1.16  | 1.40E-10 | 0.00  | 9.94E-01 | 0.00  | 1.00E+00 |
| FBgn0036825 | RpL26        | 26262 | 1.18  | 5.38E-19 | -0.09 | 2.57E-01 | 0.00  | 1.00E+00 |
| FBgn0039359 | RpL27        | 30893 | 1.82  | 7.59E-44 | -0.07 | 4.00E-01 | 0.00  | 1.00E+00 |
| FBgn0035422 | RpL28        | 33296 | 0.92  | 3.35E-12 | -0.05 | 5.91E-01 | 0.00  | 1.00E+00 |
| FBgn0016726 | RpL29        | 15027 | 2.47  | 1.56E-58 | -0.03 | 7.67E-01 | 0.00  | 1.00E+00 |
| FBgn0020910 | RpL3         | 84241 | 0.82  | 9.57E-18 | -0.32 | 1.18E-04 | 0.00  | 1.00E+00 |
| FBgn0086710 | RpL30        | 15925 | 0.82  | 5.69E-08 | -0.15 | 9.68E-02 | 0.00  | 1.00E+00 |
| FBgn0285949 | RpL31        | 23945 | 1.87  | 4.08E-31 | -0.07 | 3.96E-01 | 0.00  | 1.00E+00 |
| FBgn0002626 | RpL32        | 26148 | 1.55  | 3.34E-30 | -0.08 | 3.38E-01 | 0.00  | 1.00E+00 |
| FBgn0039406 | RpL34a       | 4745  | 0.79  | 2.78E-08 | 0.00  | 9.93E-01 | 0.00  | 1.00E+00 |
| FBgn0037686 | RpL34b       | 14511 | 1.00  | 8.70E-10 | 0.00  | 1.00E+00 | 0.00  | 1.00E+00 |
| FBgn0029785 | RpL35        | 22897 | 1.11  | 1.57E-14 | -0.04 | 6.97E-01 | 0.00  | 1.00E+00 |
| FBgn0037328 | RpL35A       | 18082 | 1.07  | 1.66E-06 | 0.03  | 7.56E-01 | 0.00  | 1.00E+00 |
| FBgn0002579 | RpL36        | 22750 | 0.63  | 4.03E-05 | -0.05 | 5.93E-01 | 0.00  | 1.00E+00 |
| FBgn0031980 | RpL36A       | 20310 | 1.45  | 5.37E-17 | -0.01 | 9.36E-01 | 0.00  | 1.00E+00 |
| FBgn0030616 | RpL37a       | 28870 | 1.44  | 2.13E-31 | -0.01 | 9.31E-01 | 0.00  | 1.00E+00 |
| FBgn0261608 | RpL37A       | 15974 | 1.17  | 6.51E-15 | -0.05 | 5.40E-01 | 0.00  | 1.00E+00 |
| FBgn0040007 | RpL38        | 10930 | -1.22 | 8.25E-12 | 0.01  | 9.45E-01 | 0.00  | 1.00E+00 |
| FBgn0023170 | RpL39        | 14842 | 1.09  | 6.07E-13 | -0.01 | 9.54E-01 | 0.00  | 1.00E+00 |
| FBgn0003279 | RpL4         | 68623 | 0.74  | 7.97E-10 | -0.01 | 9.31E-01 | 0.00  | 1.00E+00 |
| FBgn0003941 | RpL40        | 28783 | 1.13  | 3.13E-23 | -0.04 | 6.70E-01 | 0.00  | 1.00E+00 |
| FBgn0066084 | RpL41        | 44221 | 1.27  | 1.23E-12 | -0.10 | 2.39E-01 | 0.00  | 1.00E+00 |
| FBgn0039857 | RpL6         | 40858 | 0.66  | 5.68E-09 | -0.02 | 8.96E-01 | 0.00  | 1.00E+00 |
| FBgn0005593 | RpL7         | 46015 | 0.88  | 6.36E-19 | -0.07 | 3.97E-01 | 0.00  | 1.00E+00 |
| FBgn0014026 | RpL7A        | 51685 | 0.64  | 1.91E-08 | -0.04 | 6.85E-01 | 0.00  | 1.00E+00 |
| FBgn0261602 | RpL8         | 41973 | 0.93  | 2.53E-13 | -0.03 | 7.65E-01 | 0.00  | 1.00E+00 |
| FBgn0015756 | RpL9         | 33572 | 1.23  | 3.91E-24 | -0.04 | 6.30E-01 | 0.00  | 1.00E+00 |
| FBgn0000100 | RpLP0        | 49121 | 0.88  | 2.69E-10 | -0.02 | 8.64E-01 | 0.00  | 1.00E+00 |
| FBgn0002593 | RpLP1        | 34330 | 1.50  | 2.88E-29 | -0.05 | 6.18E-01 | 0.00  | 1.00E+00 |
| FBgn0003274 | RpLP2        | 29029 | 0.72  | 3.01E-04 | 0.02  | 8.90E-01 | 0.00  | 1.00E+00 |
| FBgn0015283 | Rpn10        | 3237  | 0.60  | 8.41E-07 | -0.04 | 6.60E-01 | -0.01 | 8.51E-01 |
| FBgn0285947 | RpS10b       | 22456 | 0.90  | 7.94E-17 | -0.04 | 7.10E-01 | 0.00  | 1.00E+00 |
| FBgn0033699 | RpS11        | 27054 | 1.05  | 7.21E-11 | -0.02 | 8.37E-01 | 0.00  | 1.00E+00 |
| FBgn0286213 | RpS12        | 22585 | 1.49  | 7.12E-26 | -0.27 | 1.12E-02 | 0.00  | 1.00E+00 |
| FBgn0010265 | RpS13        | 36129 | 0.85  | 1.52E-13 | -0.04 | 7.11E-01 | 0.00  | 1.00E+00 |
| FBgn0004403 | RpS14a       | 14676 | 0.84  | 1.97E-10 | -0.02 | 8.88E-01 | 0.00  | 1.00E+00 |
| FBgn0004404 | RpS14b       | 5724  | 1.39  | 5.22E-15 | 0.00  | 9.94E-01 | 0.00  | 1.00E+00 |
| FBgn0034138 | RpS15        | 32466 | 1.00  | 1.50E-15 | -0.12 | 1.11E-01 | 0.00  | 1.00E+00 |
| FBgn0010198 | RpS15Aa      | 22650 | 0.73  | 3.20E-09 | -0.08 | 3.36E-01 | 0.00  | 1.00E+00 |
| FBgn0033555 | RpS15Ab      | 2011  | 0.81  | 1.69E-12 | -0.06 | 5.17E-01 | 0.00  | 1.00E+00 |

|             |                   |       |       |          |       |           |       |          |
|-------------|-------------------|-------|-------|----------|-------|-----------|-------|----------|
| FBgn0005533 | RpS17             | 26903 | 1.72  | 4.39E-37 | -0.06 | 4.59E-01  | 0.00  | 1.00E+00 |
| FBgn0010411 | RpS18             | 32633 | 1.38  | 2.01E-26 | -0.05 | 5.78E-01  | 0.00  | 1.00E+00 |
| FBgn0010412 | RpS19a            | 27379 | 1.20  | 1.49E-08 | 0.00  | 9.88E-01  | 0.00  | 1.00E+00 |
| FBgn0004867 | RpS2              | 48438 | 0.78  | 4.36E-11 | -0.12 | 1.17E-01  | 0.00  | 1.00E+00 |
| FBgn0019936 | RpS20             | 22643 | 1.07  | 7.12E-14 | -0.18 | 4.75E-02  | 0.00  | 1.00E+00 |
| FBgn0015521 | RpS21             | 11086 | 0.72  | 1.53E-06 | -0.03 | 8.07E-01  | 0.00  | 1.00E+00 |
| FBgn0033912 | RpS23             | 31632 | 1.84  | 3.62E-35 | -0.04 | 6.97E-01  | 0.00  | 1.00E+00 |
| FBgn0261596 | RpS24             | 32050 | 1.17  | 2.61E-22 | -0.08 | 2.62E-01  | -0.01 | 1.00E+00 |
| FBgn0086472 | RpS25             | 28124 | 0.59  | 1.91E-05 | -0.04 | 6.82E-01  | 0.00  | 1.00E+00 |
| FBgn0261597 | RpS26             | 31285 | 1.52  | 3.40E-35 | -0.02 | 8.47E-01  | 0.00  | 1.00E+00 |
| FBgn0030136 | RpS28b            | 20297 | 0.86  | 1.46E-06 | -0.07 | 3.87E-01  | 0.00  | 1.00E+00 |
| FBgn0261599 | RpS29             | 31258 | 0.83  | 1.80E-11 | -0.07 | 4.10E-01  | 0.00  | 1.00E+00 |
| FBgn0002622 | RpS3              | 41096 | 1.00  | 7.80E-28 | -0.10 | 1.22E-01  | 0.00  | 1.00E+00 |
| FBgn0038834 | RpS30             | 22722 | 0.64  | 4.12E-07 | -0.04 | 6.49E-01  | 0.00  | 1.00E+00 |
| FBgn0011284 | RpS4              | 55820 | 1.07  | 4.18E-29 | -0.06 | 4.68E-01  | 0.00  | 1.00E+00 |
| FBgn0002590 | RpS5a             | 46391 | 0.92  | 1.61E-23 | -0.07 | 3.37E-01  | 0.00  | 1.00E+00 |
| FBgn0261592 | RpS6              | 46007 | 1.20  | 1.79E-20 | -0.04 | 6.36E-01  | 0.00  | 1.00E+00 |
| FBgn0039757 | RpS7              | 40640 | 0.89  | 5.35E-11 | -0.05 | 5.82E-01  | 0.00  | 1.00E+00 |
| FBgn0039713 | RpS8              | 39353 | 1.28  | 3.54E-25 | -0.04 | 6.64E-01  | 0.00  | 1.00E+00 |
| FBgn0010408 | RpS9              | 31452 | 0.59  | 9.82E-06 | -0.15 | 7.18E-02  | 0.00  | 1.00E+00 |
| FBgn0028686 | Rpt3              | 3750  | 0.69  | 2.73E-15 | -0.02 | 8.50E-01  | -0.01 | 9.19E-01 |
| FBgn0283472 | S6k               | 1848  | -1.11 | 1.68E-13 | 0.06  | 4.86E-01  | 0.02  | 7.50E-01 |
| FBgn0262866 | S6kl1             | 523   | -0.60 | 8.22E-05 | 0.05  | 5.74E-01  | 0.00  | 1.00E+00 |
| FBgn0037672 | sage              | 118   | -0.97 | 7.66E-04 | 0.02  | 8.54E-01  | 0.00  | 1.00E+00 |
| FBgn0026371 | SAK               | 1348  | -0.58 | 1.68E-07 | -0.05 | 6.10E-01  | 0.01  | 1.00E+00 |
| FBgn0013334 | Sap47             | 1082  | -0.65 | 1.87E-05 | 0.00  | 9.73E-01  | 0.00  | 1.00E+00 |
| FBgn0267378 | sau               | 2766  | -0.71 | 2.10E-12 | -0.08 | 2.97E-01  | 0.00  | 1.00E+00 |
| FBgn0051950 | Sbat              | 156   | 1.17  | 4.34E-07 | 0.07  | 4.00E-01  | -0.01 | 1.00E+00 |
| FBgn0261872 | scaf6             | 2332  | -0.63 | 8.81E-18 | -0.03 | 7.70E-01  | 0.00  | 1.00E+00 |
| FBgn0038038 | Scppdh2           | 466   | 1.03  | 4.86E-08 | -0.02 | 8.24E-01  | 0.08  | 2.30E-01 |
| FBgn0020907 | Scp2              | 14    | 0.05  | 7.27E-01 | 0.07  | 5.58E-01  | 0.78  | 4.12E-02 |
| FBgn0021765 | scu               | 3185  | 1.00  | 5.91E-14 | -0.11 | 1.65E-01  | 0.00  | 1.00E+00 |
| FBgn0041094 | scyl              | 8561  | -1.33 | 8.68E-18 | -0.06 | 4.87E-01  | -0.01 | 1.00E+00 |
| FBgn0003345 | sd                | 7654  | -0.68 | 6.92E-06 | -0.01 | 9.09E-01  | 0.00  | 1.00E+00 |
| FBgn0010415 | Sdc               | 5389  | -0.69 | 8.04E-06 | -0.01 | 9.30E-01  | 0.00  | 1.00E+00 |
| FBgn0014028 | SdhB              | 1621  | 0.63  | 1.89E-06 | 0.00  | 9.76E-01  | 0.00  | 1.00E+00 |
| FBgn0039112 | SdhD              | 864   | 0.75  | 4.35E-07 | -0.02 | 8.28E-01  | 0.00  | 1.00E+00 |
| FBgn0053497 | Sdic2             | 15    | -0.38 | 1.03E-01 | 0.06  | 5.87E-01  | 2.96  | 5.80E-04 |
| FBgn0035771 | Sec63             | 3488  | 0.58  | 7.21E-13 | 0.02  | 8.44E-01  | 0.00  | 1.00E+00 |
| FBgn0010414 | SerT              | 71    | -0.42 | 8.67E-02 | -1.55 | 5.72E-07  | -0.03 | 6.87E-01 |
| FBgn0040022 | Set1              | 2236  | -1.19 | 1.64E-18 | -0.04 | 6.94E-01  | 0.00  | 1.00E+00 |
| FBgn0003371 | sgg               | 3372  | -0.85 | 5.82E-06 | 0.07  | 4.58E-01  | 0.00  | 1.00E+00 |
| FBgn0052423 | shcp              | 1920  | -0.90 | 1.74E-10 | 0.04  | 6.70E-01  | 0.00  | 1.00E+00 |
| FBgn0003392 | shi               | 2787  | -0.60 | 3.04E-06 | -0.03 | 7.56E-01  | 0.00  | 1.00E+00 |
| FBgn0263873 | sick              | 3454  | 0.08  | 6.69E-01 | 3.08  | 4.79E-168 | 0.00  | 1.00E+00 |
| FBgn0010762 | sirj              | 2866  | -0.61 | 1.03E-05 | -0.07 | 4.22E-01  | 0.00  | 1.00E+00 |
| FBgn0037802 | Sirt6             | 173   | -0.63 | 1.58E-03 | 0.03  | 7.51E-01  | 0.00  | 1.00E+00 |
| FBgn0031971 | Sirup             | 481   | 0.45  | 4.83E-02 | -0.90 | 1.93E-04  | 0.00  | 1.00E+00 |
| FBgn0031998 | SLC5A11           | 132   | -0.38 | 1.05E-01 | -0.99 | 6.52E-04  | -0.01 | 9.70E-01 |
| FBgn0037810 | sle               | 3373  | -0.67 | 2.17E-05 | 0.02  | 8.42E-01  | 0.00  | 1.00E+00 |
| FBgn0037203 | slif              | 87    | -0.66 | 1.01E-02 | -0.06 | 5.03E-01  | 0.00  | 1.00E+00 |
| FBgn0040011 | Slmap             | 2039  | -0.78 | 5.55E-15 | 0.04  | 7.15E-01  | 0.00  | 1.00E+00 |
| FBgn0040283 | SMC1              | 3037  | -0.64 | 1.85E-06 | -0.02 | 8.19E-01  | 0.00  | 1.00E+00 |
| FBgn0261789 | SmD2              | 1956  | 0.73  | 2.12E-06 | 0.04  | 6.65E-01  | 0.00  | 1.00E+00 |
| FBgn0000426 | SmF               | 1111  | 0.73  | 3.23E-05 | 0.01  | 9.46E-01  | 0.00  | 1.00E+00 |
| FBgn0003444 | smo               | 2301  | -0.63 | 3.91E-07 | -0.10 | 2.03E-01  | 0.00  | 1.00E+00 |
| FBgn0036282 | Smyd4-2           | 19    | 1.33  | 8.38E-04 | 1.15  | 6.49E-03  | 0.00  | 1.00E+00 |
| FBgn0086129 | snama             | 1490  | -0.65 | 8.22E-09 | 0.02  | 8.84E-01  | 0.01  | 1.00E+00 |
| FBgn0011288 | Snap25            | 98    | -0.08 | 7.87E-01 | 4.02  | 5.30E-61  | -0.02 | 8.64E-01 |
| FBgn0030026 | sni               | 488   | 0.71  | 2.21E-08 | 0.07  | 3.85E-01  | 0.00  | 1.00E+00 |
| FBgn0083027 | snoRNA:Psi18S-531 | 228   | 0.76  | 7.84E-06 | 0.01  | 9.54E-01  | -0.99 | 6.07E-15 |
| FBgn0065099 | snRNA:7SK         | 74    | 0.77  | 8.34E-03 | 0.12  | 3.03E-01  | -0.01 | 1.00E+00 |
| FBgn0041721 | snRNA:U12         | 72    | 0.99  | 6.65E-04 | 0.25  | 9.48E-02  | 0.02  | 9.19E-01 |
| FBgn0052758 | Snx27             | 1056  | -0.64 | 4.13E-06 | 0.00  | 9.90E-01  | 0.00  | 1.00E+00 |
| FBgn0003462 | Sod1              | 4607  | 0.82  | 6.89E-09 | -0.01 | 9.62E-01  | -0.02 | 7.72E-01 |
| FBgn0033631 | Sod3              | 3675  | 0.63  | 1.89E-07 | -0.08 | 3.00E-01  | -0.01 | 1.00E+00 |
| FBgn0042630 | Sox21b            | 15    | 0.01  | 9.47E-01 | -0.84 | 2.59E-02  | 0.01  | 1.00E+00 |
| FBgn0020378 | Sp1               | 380   | 0.20  | 4.39E-01 | -2.11 | 5.44E-08  | 0.01  | 1.00E+00 |
| FBgn0035710 | SP1173            | 2433  | 0.10  | 5.98E-01 | 0.11  | 1.58E-01  | 0.66  | 3.68E-07 |
| FBgn0028562 | SPARC             | 1433  | 0.81  | 2.04E-06 | -0.34 | 1.04E-02  | 0.00  | 1.00E+00 |
| FBgn0040623 | Spase12           | 1070  | 0.90  | 4.41E-07 | 0.02  | 8.81E-01  | -0.01 | 1.00E+00 |
| FBgn0039172 | Spase22-23        | 2345  | 0.62  | 4.08E-07 | 0.01  | 9.32E-01  | -0.01 | 1.00E+00 |
| FBgn0037025 | Spc105R           | 1970  | -0.64 | 3.39E-06 | 0.00  | 9.82E-01  | 0.02  | 6.88E-01 |
| FBgn0031549 | Spindly           | 889   | -0.77 | 1.08E-11 | -0.58 | 2.41E-11  | -0.47 | 5.60E-07 |
| FBgn0003483 | spn-E             | 262   | 0.05  | 8.37E-01 | 0.95  | 2.55E-08  | 0.01  | 1.00E+00 |
| FBgn0039795 | Spn100A           | 2226  | 0.21  | 4.08E-01 | -0.60 | 2.38E-02  | -0.01 | 1.00E+00 |
| FBgn0028990 | Spn27A            | 3624  | 0.72  | 4.88E-15 | -0.12 | 5.13E-02  | 0.00  | 1.00E+00 |
| FBgn0033115 | Spn42De           | 140   | 1.10  | 3.10E-06 | 0.08  | 3.73E-01  | 0.00  | 1.00E+00 |
| FBgn0024294 | Spn43Aa           | 3847  | 0.81  | 1.21E-04 | -0.01 | 9.37E-01  | -0.02 | 8.73E-01 |

|             |           |       |       |          |       |           |       |          |
|-------------|-----------|-------|-------|----------|-------|-----------|-------|----------|
| FBgn0033574 | Spn47C    | 40    | -2.01 | 4.50E-05 | 2.30  | 2.05E-07  | 0.00  | 1.00E+00 |
| FBgn0003486 | spo       | 14    | -0.61 | 1.57E-02 | 0.01  | 9.14E-01  | 0.00  | 1.00E+00 |
| FBgn0263987 | spoon     | 4782  | -0.94 | 1.55E-08 | -0.01 | 9.13E-01  | 0.00  | 1.00E+00 |
| FBgn0031260 | Spp       | 2973  | 0.59  | 1.42E-06 | -0.01 | 9.49E-01  | 0.00  | 1.00E+00 |
| FBgn0032362 | spz4      | 38    | -1.26 | 9.87E-05 | -0.02 | 8.49E-01  | 0.00  | 1.00E+00 |
| FBgn0263396 | sqd       | 24176 | -1.21 | 2.03E-15 | 0.01  | 9.25E-01  | 0.00  | 1.00E+00 |
| FBgn0037248 | srl       | 2653  | -0.64 | 2.17E-06 | -0.05 | 5.95E-01  | 0.00  | 1.00E+00 |
| FBgn0011481 | Ssdp      | 3514  | -1.21 | 3.35E-12 | -0.02 | 8.47E-01  | 0.00  | 1.00E+00 |
| FBgn0037665 | St2       | 912   | 0.77  | 6.07E-04 | -0.05 | 5.42E-01  | -0.09 | 2.64E-01 |
| FBgn0265052 | St3       | 62    | 0.34  | 1.70E-01 | 1.40  | 5.50E-08  | 1.21  | 3.44E-06 |
| FBgn0003517 | sta       | 62664 | 1.36  | 1.84E-26 | -0.14 | 8.33E-02  | 0.00  | 1.00E+00 |
| FBgn0086779 | step      | 1533  | -0.70 | 1.73E-06 | 0.05  | 5.62E-01  | 0.00  | 1.00E+00 |
| FBgn0048692 | Stk       | 960   | -0.69 | 1.41E-04 | 0.03  | 7.66E-01  | 0.00  | 1.00E+00 |
| FBgn0020299 | slumps    | 1216  | -0.16 | 1.84E-01 | -0.61 | 1.14E-13  | -0.01 | 1.00E+00 |
| FBgn0086708 | stv       | 2256  | 0.16  | 5.24E-01 | -1.48 | 4.91E-10  | 0.01  | 1.00E+00 |
| FBgn0014388 | sty       | 1582  | -0.70 | 7.56E-06 | 0.04  | 6.80E-01  | 0.00  | 1.00E+00 |
| FBgn0003567 | su(Hw)    | 2513  | -0.63 | 1.09E-08 | -0.01 | 9.69E-01  | 0.00  | 1.00E+00 |
| FBgn0014391 | sun       | 1616  | 1.01  | 5.14E-09 | 0.01  | 9.64E-01  | -0.01 | 1.00E+00 |
| FBgn0028675 | Sur       | 11    | -0.09 | 6.53E-01 | 0.58  | 4.64E-02  | 0.00  | 1.00E+00 |
| FBgn0261403 | sxc       | 3212  | -0.69 | 8.92E-08 | -0.05 | 6.02E-01  | 0.00  | 1.00E+00 |
| FBgn0038826 | Syp       | 23681 | -1.10 | 4.58E-08 | -0.03 | 7.82E-01  | 0.00  | 1.00E+00 |
| FBgn0028400 | Syt4      | 264   | 7.49  | 1.96E-06 | 4.89  | 1.96E-08  | 6.07  | 2.24E-12 |
| FBgn0028398 | Taf10     | 549   | 0.66  | 1.19E-04 | -0.01 | 9.18E-01  | 0.00  | 1.00E+00 |
| FBgn0004406 | tam       | 490   | 0.29  | 8.95E-02 | 0.72  | 1.51E-09  | 0.01  | 8.66E-01 |
| FBgn0021795 | Tapdelta  | 3819  | 0.58  | 3.60E-05 | -0.02 | 8.76E-01  | 0.00  | 1.00E+00 |
| FBgn0034451 | TBCB      | 731   | 0.19  | 2.42E-01 | 0.68  | 1.75E-10  | 0.58  | 3.63E-07 |
| FBgn0285892 | tea       | 768   | -0.63 | 4.20E-05 | -0.03 | 7.57E-01  | 0.00  | 1.00E+00 |
| FBgn0261953 | TfAP-2    | 180   | 0.34  | 1.52E-01 | -2.03 | 5.20E-06  | 0.01  | 1.00E+00 |
| FBgn0013347 | TfIIA-S   | 1676  | 0.94  | 1.18E-09 | 0.02  | 8.85E-01  | 0.00  | 1.00E+00 |
| FBgn0026869 | Thd1      | 3729  | -0.71 | 8.71E-05 | -0.03 | 7.71E-01  | 0.01  | 1.00E+00 |
| FBgn0261560 | Thor      | 335   | 1.02  | 1.07E-03 | -0.09 | 4.00E-01  | 0.00  | 1.00E+00 |
| FBgn0032988 | Tif1A     | 2210  | -0.65 | 1.22E-11 | -0.06 | 4.87E-01  | 0.00  | 1.00E+00 |
| FBgn0027359 | Tim8      | 995   | 0.89  | 3.09E-07 | 0.03  | 7.23E-01  | 0.00  | 1.00E+00 |
| FBgn0025879 | Timp      | 183   | 1.31  | 4.85E-08 | 0.00  | 9.93E-01  | 0.00  | 1.00E+00 |
| FBgn0004841 | TKR86C    | 16    | 2.44  | 5.62E-04 | 6.69  | 3.31E-07  | 6.67  | 9.56E-07 |
| FBgn0003721 | Tm1       | 10585 | -0.87 | 8.91E-13 | -0.01 | 9.30E-01  | 0.00  | 1.00E+00 |
| FBgn0267796 | Tmc       | 187   | -1.09 | 6.16E-06 | -0.01 | 9.30E-01  | -0.01 | 9.67E-01 |
| FBgn0026160 | tna       | 4864  | -0.86 | 1.63E-08 | -0.01 | 9.53E-01  | 0.00  | 1.00E+00 |
| FBgn0033357 | Tom7      | 1314  | 1.19  | 2.26E-12 | 0.04  | 6.63E-01  | 0.00  | 1.00E+00 |
| FBgn0037751 | topi      | 17    | 0.16  | 2.73E-01 | 3.33  | 7.94E-09  | 0.01  | 1.00E+00 |
| FBgn0086355 | Tpi       | 3109  | 0.75  | 5.13E-06 | 0.06  | 4.99E-01  | 0.00  | 1.00E+00 |
| FBgn0031692 | TpnC25D   | 30    | -0.49 | 4.92E-02 | -0.68 | 4.79E-02  | -0.05 | 5.00E-01 |
| FBgn0086674 | Tpst      | 715   | -1.40 | 5.38E-11 | 0.03  | 7.58E-01  | 0.00  | 1.00E+00 |
| FBgn0030748 | Traf1like | 115   | -0.73 | 5.07E-03 | -0.08 | 4.80E-01  | 0.00  | 1.00E+00 |
| FBgn0026319 | Traf4     | 481   | 0.24  | 1.13E-01 | 0.76  | 4.59E-17  | 0.00  | 1.00E+00 |
| FBgn0261793 | Trf2      | 2420  | -0.99 | 3.98E-07 | 0.03  | 7.55E-01  | 0.00  | 1.00E+00 |
| FBgn0013263 | Trf       | 369   | -1.26 | 3.45E-08 | -0.01 | 9.05E-01  | 0.00  | 1.00E+00 |
| FBgn0050343 | Tsen15    | 167   | -1.57 | 1.05E-14 | 0.02  | 8.94E-01  | 0.00  | 1.00E+00 |
| FBgn0003866 | tsh       | 5545  | -0.66 | 4.17E-20 | -0.16 | 2.69E-03  | 0.00  | 1.00E+00 |
| FBgn0031850 | Tsp       | 2665  | 0.69  | 2.98E-10 | -0.34 | 3.00E-04  | 0.00  | 1.00E+00 |
| FBgn0032943 | Tsp39D    | 1560  | -0.58 | 8.20E-05 | 0.01  | 9.37E-01  | 0.00  | 1.00E+00 |
| FBgn0029507 | Tsp42Ed   | 56    | 0.33  | 1.26E-01 | 1.57  | 7.02E-04  | -0.02 | 8.30E-01 |
| FBgn0033130 | Tsp42Ei   | 87    | 0.57  | 2.08E-02 | -0.61 | 1.22E-02  | -0.02 | 7.84E-01 |
| FBgn0043550 | Tsp68C    | 24    | 0.92  | 4.23E-03 | 3.43  | 4.52E-12  | 0.04  | 5.83E-01 |
| FBgn0027865 | Tsp96F    | 1091  | -0.73 | 1.13E-04 | 0.00  | 9.93E-01  | 0.00  | 1.00E+00 |
| FBgn0032744 | Ttc19     | 220   | -0.65 | 9.39E-04 | 1.15  | 1.18E-14  | 0.01  | 1.00E+00 |
| FBgn0051108 | TTL5      | 618   | -0.89 | 5.37E-10 | 0.00  | 9.85E-01  | 0.00  | 1.00E+00 |
| FBgn0052364 | tut       | 126   | -0.50 | 3.44E-02 | -0.04 | 6.75E-01  | -3.19 | 3.46E-25 |
| FBgn0039434 | TwdIM     | 16    | 0.92  | 5.02E-03 | 0.34  | 1.02E-01  | 2.59  | 7.18E-05 |
| FBgn0029170 | TwdIT     | 119   | 0.43  | 7.55E-02 | -1.52 | 1.34E-06  | -0.11 | 2.46E-01 |
| FBgn0003900 | twi       | 636   | 0.03  | 8.92E-01 | -0.69 | 5.16E-11  | -0.12 | 1.00E-01 |
| FBgn0262801 | twr       | 2970  | 0.60  | 6.91E-05 | -0.03 | 8.10E-01  | -0.01 | 1.00E+00 |
| FBgn0034636 | twz       | 761   | 0.58  | 1.40E-03 | -0.01 | 9.54E-01  | 0.03  | 6.00E-01 |
| FBgn0029996 | UbcE2H    | 1978  | -0.73 | 9.00E-09 | 0.15  | 6.58E-02  | 0.01  | 1.00E+00 |
| FBgn0026076 | UBL3      | 1245  | -0.79 | 6.80E-08 | -0.02 | 8.24E-01  | 0.00  | 1.00E+00 |
| FBgn0003944 | Ubx       | 347   | -0.41 | 9.19E-02 | -1.48 | 4.15E-08  | 0.00  | 1.00E+00 |
| FBgn0262124 | uex       | 1998  | -0.87 | 4.48E-09 | 0.01  | 9.32E-01  | 0.00  | 1.00E+00 |
| FBgn0040259 | Ugt302C1  | 1204  | -0.23 | 8.13E-02 | 0.70  | 2.85E-15  | 0.00  | 1.00E+00 |
| FBgn0040251 | Ugt302K1  | 820   | -1.93 | 1.49E-26 | 2.29  | 4.84E-76  | 0.00  | 1.00E+00 |
| FBgn0040091 | Ugt317A1  | 411   | 0.43  | 6.49E-03 | -1.04 | 4.52E-19  | -1.12 | 4.52E-23 |
| FBgn0045800 | Uhg1      | 543   | -0.82 | 8.92E-04 | 0.04  | 6.63E-01  | 0.00  | 1.00E+00 |
| FBgn0083124 | Uhg4      | 570   | -0.83 | 2.41E-04 | -0.02 | 8.43E-01  | 0.00  | 1.00E+00 |
| FBgn0025549 | unc-119   | 1224  | -0.71 | 1.70E-13 | -0.09 | 1.90E-01  | 0.00  | 1.00E+00 |
| FBgn0025726 | unc-13    | 8539  | -0.16 | 3.82E-01 | 3.08  | 1.68E-117 | 0.01  | 9.70E-01 |
| FBgn0024184 | unc-4     | 56    | 0.21  | 1.73E-01 | -1.78 | 2.44E-04  | 0.01  | 1.00E+00 |
| FBgn0263352 | Unr       | 3986  | -1.51 | 8.25E-12 | -0.01 | 9.12E-01  | 0.00  | 1.00E+00 |
| FBgn0030904 | upd2      | 26    | 0.21  | 1.41E-01 | 2.98  | 6.12E-04  | 0.00  | 1.00E+00 |
| FBgn0053542 | upd3      | 34    | 0.01  | 9.69E-01 | 2.77  | 2.35E-07  | 0.01  | 1.00E+00 |
| FBgn0034245 | UQCR-6.4  | 522   | 0.83  | 2.12E-05 | 0.02  | 8.90E-01  | 0.00  | 1.00E+00 |



|             |          |       |       |          |       |          |       |          |
|-------------|----------|-------|-------|----------|-------|----------|-------|----------|
| FBgn0038271 | UQCR-C1  | 4523  | 0.84  | 1.29E-13 | 0.03  | 7.62E-01 | 0.00  | 1.00E+00 |
| FBgn0036728 | UQCR-Q   | 1447  | 1.88  | 3.34E-40 | 0.00  | 9.79E-01 | 0.00  | 1.00E+00 |
| FBgn0033428 | Urod     | 1510  | 0.64  | 3.48E-06 | 0.02  | 8.25E-01 | 0.00  | 1.00E+00 |
| FBgn0260749 | Utx      | 1479  | -0.75 | 1.33E-17 | -0.06 | 4.40E-01 | 0.00  | 1.00E+00 |
| FBgn0050101 | Vajk4    | 36    | 1.18  | 5.97E-04 | 0.14  | 2.34E-01 | 0.00  | 1.00E+00 |
| FBgn0035942 | VaiRS-m  | 232   | 0.60  | 4.18E-04 | -0.01 | 9.18E-01 | 0.00  | 1.00E+00 |
| FBgn0029687 | Vap33    | 7747  | -0.78 | 2.49E-07 | 0.01  | 9.16E-01 | 0.00  | 1.00E+00 |
| FBgn0053200 | VepD     | 48    | -1.91 | 1.02E-06 | 0.11  | 3.01E-01 | 0.00  | 1.00E+00 |
| FBgn0262524 | ver      | 296   | -0.22 | 2.25E-01 | 2.11  | 4.76E-65 | 0.00  | 1.00E+00 |
| FBgn0261341 | verm     | 9505  | 0.62  | 9.38E-04 | -0.13 | 1.70E-01 | 0.00  | 1.00E+00 |
| FBgn0033911 | VGAT     | 134   | -0.09 | 7.49E-01 | 0.64  | 1.29E-03 | -0.63 | 6.34E-03 |
| FBgn0267975 | vib      | 1469  | -1.04 | 1.87E-26 | 0.04  | 6.69E-01 | -0.01 | 1.00E+00 |
| FBgn0024183 | vig      | 3544  | -0.78 | 1.04E-08 | 0.01  | 9.06E-01 | 0.00  | 1.00E+00 |
| FBgn0259078 | vic      | 2238  | -0.62 | 3.56E-08 | -0.03 | 7.54E-01 | 0.00  | 1.00E+00 |
| FBgn0052350 | Vps11    | 1027  | -0.65 | 2.49E-03 | 0.00  | 9.72E-01 | 0.00  | 1.00E+00 |
| FBgn0260987 | vid      | 2064  | -0.95 | 1.33E-21 | -0.06 | 4.50E-01 | -0.01 | 1.00E+00 |
| FBgn0266848 | wap      | 3147  | -0.66 | 1.92E-08 | -0.03 | 7.45E-01 | 0.00  | 1.00E+00 |
| FBgn0027492 | wdb      | 5970  | -0.84 | 1.30E-11 | 0.01  | 9.22E-01 | 0.00  | 1.00E+00 |
| FBgn0027499 | wde      | 2735  | -0.89 | 1.99E-07 | 0.02  | 8.39E-01 | 0.00  | 1.00E+00 |
| FBgn0011739 | wts      | 1411  | -0.66 | 9.62E-07 | 0.02  | 8.38E-01 | 0.00  | 1.00E+00 |
| FBgn0261113 | Xrp1     | 10923 | -0.55 | 6.59E-06 | 1.08  | 1.69E-26 | 0.11  | 1.21E-01 |
| FBgn0041711 | yellow-e | 215   | 0.87  | 5.43E-05 | -0.03 | 7.39E-01 | 0.00  | 1.00E+00 |
| FBgn0041710 | yellow-f | 83    | -0.23 | 3.71E-01 | -0.62 | 3.15E-02 | -0.05 | 5.27E-01 |
| FBgn0039896 | yellow-h | 56    | 0.51  | 4.40E-02 | 2.46  | 1.25E-10 | -0.01 | 1.00E+00 |
| FBgn0040060 | yip7     | 41    | -0.04 | 6.60E-01 | -0.97 | 3.20E-02 | -0.02 | 9.62E-01 |
| FBgn0039261 | Ythdf    | 2954  | -0.66 | 9.40E-09 | -0.04 | 6.25E-01 | 0.00  | 1.00E+00 |
| FBgn0004606 | zfh1     | 688   | -0.13 | 5.56E-01 | -0.63 | 2.67E-04 | 0.00  | 1.00E+00 |
| FBgn0266709 | Zmynd10  | 117   | -1.05 | 1.89E-06 | -0.13 | 2.22E-01 | 0.00  | 1.00E+00 |
| FBgn0011642 | Zyx      | 2299  | -1.25 | 1.45E-35 | 0.00  | 9.77E-01 | 0.00  | 1.00E+00 |
