# Supplementary material for: Single amino-acid mutation in a Drosoph ila melanogaster ribosomal protein: An insight in uL11 transcriptional activity
Source: PubMed Central journal article supplement (PMC9387862; doi:10.1371/journal.pone.0273198), 2022-08-18
Supplement: pone.0273198.s009.pdf [file pone.0273198.s009.pdf]

| <i>Expression in corto</i> <sup>L1/corto</sup> <sup>420</sup> | <i>GO term</i> | <i>Count</i>                                                    | <i>p-value</i> | <i>Benjamini</i> |          |
|---------------------------------------------------------------|----------------|-----------------------------------------------------------------|----------------|------------------|----------|
| up-regulated                                                  | BP-GO:0002181  | cytoplasmic translation                                         | 66             | 6.90E-72         | 4.20E-69 |
| up-regulated                                                  | CC-GO:0005840  | ribosome                                                        | 61             | 1.00E-61         | 2.00E-59 |
| up-regulated                                                  | MF-GO:0003735  | structural constituent of ribosome                              | 82             | 5.40E-47         | 1.70E-44 |
| up-regulated                                                  | CC-GO:0022625  | cytosolic large ribosomal subunit                               | 38             | 3.90E-39         | 3.90E-37 |
| up-regulated                                                  | CC-GO:0005840  | cytosolic small ribosomal subunit                               | 28             | 4.10E-28         | 2.70E-26 |
| up-regulated                                                  | CC-GO:0005840  | cytosolic ribosome                                              | 41             | 2.10E-23         | 1.00E-21 |
| up-regulated                                                  | BP-GO:0006412  | translation                                                     | 74             | 2.80E-22         | 8.50E-20 |
| up-regulated                                                  | CC-GO:0005840  | mitochondrial respiratory chain complex I                       | 15             | 6.40E-10         | 1.80E-08 |
| up-regulated                                                  | MF-GO:0003954  | NADH dehydrogenase activity                                     | 10             | 1.50E-06         | 1.60E-04 |
| up-regulated                                                  | BP-GO:0002181  | mitochondrial electron transport, NADH to ubiquinone            | 9              | 2.80E-05         | 2.90E-03 |
| up-regulated                                                  | MF-GO:0003954  | NADH dehydrogenase (ubiquinone) activity                        | 8              | 4.10E-04         | 1.80E-02 |
| up-regulated                                                  | CC-GO:0005751  | mitochondrial respiratory chain complex IV                      | 6              | 1.10E-04         | 1.70E-03 |
| up-regulated                                                  | MF-GO:0004129  | cytochrome-c oxidase activity                                   | 7              | 1.80E-04         | 1.20E-02 |
| up-regulated                                                  | BP-GO:0006123  | mitochondrial electron transport, cytochrome c to oxygen        | 5              | 5.40E-04         | 3.70E-02 |
| up-regulated                                                  | CC-GO:0005750  | mitochondrial respiratory chain complex III                     | 5              | 5.10E-04         | 7.20E-03 |
| up-regulated                                                  | MF-GO:0008121  | ubiquinol-cytochrome-c reductase activity                       | 5              | 7.10E-04         | 2.50E-02 |
| up-regulated                                                  | BP-GO:0006122  | mitochondrial electron transport, ubiquinol to cytochrome c     | 5              | 1.80E-03         | 9.00E-02 |
| up-regulated                                                  | BP-GO:0006465  | signal peptide processing                                       | 5              | 8.40E-05         | 7.40E-03 |
| up-regulated                                                  | CC-GO:0005787  | signal peptidase complex                                        | 3              | 7.90E-03         | 9.20E-02 |
| up-regulated                                                  | BP-GO:1902600  | proton transport                                                | 7              | 2.00E-04         | 1.50E-02 |
| up-regulated                                                  | MF-GO:0046933  | proton-transporting ATP synthase activity, rotational mechanism | 6              | 3.80E-04         | 1.80E-02 |
| up-regulated                                                  | BP-GO:0040003  | chitin-based cuticle development                                | 15             | 1.10E-03         | 6.70E-02 |
| up-regulated                                                  | MF-GO:0009055  | electron carrier activity                                       | 8              | 2.20E-03         | 7.00E-02 |
| down-regulated                                                | BP-GO:0006465  | protein phosphorylation                                         | 30             | 7.60E-09         | 9.30E-06 |
| down-regulated                                                | MF-GO:0004674  | protein serine/threonine kinase activity                        | 23             | 1.20E-08         | 2.10E-06 |
| down-regulated                                                | MF-GO:0004672  | protein kinase activity                                         | 19             | 4.00E-06         | 4.60E-04 |
| down-regulated                                                | MF-GO:0005524  | ATP binding                                                     | 45             | 2.30E-04         | 1.30E-02 |
| down-regulated                                                | BP-GO:0045475  | locomotor rhythm                                                | 9              | 9.60E-04         | 6.20E-02 |
| down-regulated                                                | CC-GO:0005834  | heterotrimeric G-protein complex                                | 5              | 7.10E-04         | 3.00E-02 |
| down-regulated                                                | MF-GO:0004871  | signal transducer activity                                      | 7              | 1.40E-03         | 5.30E-02 |
| down-regulated                                                | MF-GO:0031683  | G-protein beta/gamma-subunit complex binding                    | 4              | 1.90E-03         | 5.50E-02 |
| down-regulated                                                | BP-GO:0030307  | positive regulation of cell growth                              | 7              | 2.70E-04         | 2.40E-02 |

| <i>Expression in uL11</i> <sup>K3A</sup> | <i>GO term</i> | <i>Count</i>                                                 | <i>p-value</i> | <i>Benjamini</i> |          |
|------------------------------------------|----------------|--------------------------------------------------------------|----------------|------------------|----------|
| up-regulated                             | BP-GO:0006749  | glutathione metabolic process                                | 9              | 3.10E-07         | 1.30E-04 |
| up-regulated                             | MF-GO:0004364  | glutathione transferase activity                             | 8              | 5.00E-06         | 8.90E-04 |
| up-regulated                             | MF-GO:0004602  | glutathione peroxidase activity                              | 7              | 8.10E-06         | 8.90E-04 |
| up-regulated                             | BP-GO:0000723  | telomere maintenance                                         | 6              | 1.30E-05         | 2.60E-03 |
| up-regulated                             | BP-GO:0006310  | DNA recombination                                            | 5              | 6.70E-04         | 7.60E-02 |
| down-regulated                           | MF-GO:0043565  | sequence-specific DNA binding                                | 13             | 2.90E-05         | 4.10E-03 |
| down-regulated                           | BP-GO:0006355  | regulation of transcription, DNA-templated                   | 14             | 1.20E-04         | 9.30E-03 |
| down-regulated                           | BP-GO:0006351  | transcription, DNA-templated                                 | 13             | 2.60E-04         | 1.50E-02 |
| down-regulated                           | MF-GO:0003700  | transcription factor activity, sequence-specific DNA binding | 11             | 8.50E-04         | 4.40E-02 |
| down-regulated                           | MF-GO:0004035  | alkaline phosphatase activity                                | 4              | 9.30E-04         | 4.40E-02 |
